Feregrino et al.

# 1 **A Single-cell Transcriptomic Atlas of the Developing Chicken Limb**

2

3 Christian Feregrino<sup>1</sup>, Fabio Sacher<sup>1</sup>, Oren Parnas<sup>2, §</sup>, Patrick Tschopp<sup>1\*</sup>

4

5 <sup>1</sup>DUW Zoology, University of Basel, Vesalgasse 1, CH-4051, Basel, Switzerland; <sup>2</sup>Klarman  
6 Cell Observatory, Broad Institute of MIT and Harvard, Cambridge, MA 02142, USA

7 <sup>§</sup>Present address: The Concern Foundation Laboratories at the Lautenberg Centre for  
8 Immunology and Cancer Research, IMRIC, Hebrew University Faculty of Medicine,  
9 Jerusalem, 91120, Israel

10

11 Email addresses: [christian.feregrino@unibas.ch](mailto:christian.feregrino@unibas.ch), [fabio.sacher@stud.unibas.ch](mailto:fabio.sacher@stud.unibas.ch),  
12 [oren@ekmd.huji.ac.il](mailto:oren@ekmd.huji.ac.il), [patrick.tschopp@unibas.ch](mailto:patrick.tschopp@unibas.ch)

13

14 \*Corresponding author: Patrick Tschopp  
15 Tel.: +41 61 207 56 49  
16 [patrick.tschopp@unibas.ch](mailto:patrick.tschopp@unibas.ch)

Feregrino et al.

## 17 **Abstract**

18 **Background.** Through precise implementation of distinct cell type specification programs,  
19 differentially regulated in both space and time, complex patterns emerge during  
20 organogenesis. Thanks to its easy experimental accessibility, the developing chicken limb has  
21 long served as a paradigm to study vertebrate pattern formation. Through decades' worth of  
22 research, we now have a firm grasp on the molecular mechanisms driving limb formation at  
23 the tissue-level. However, to elucidate the dynamic interplay between transcriptional cell type  
24 specification programs and pattern formation at its relevant cellular scale, we lack  
25 appropriately resolved molecular data at the genome-wide level. Here, making use of droplet-  
26 based single-cell RNA-sequencing, we catalogue the developmental emergence of distinct  
27 tissue types and their transcriptome dynamics in the distal chicken limb, the so-called  
28 autopod, at cellular resolution.

29 **Results.** Using single-cell RNA-sequencing technology, we sequenced a total of 17,628 cells  
30 coming from three key developmental stages of chicken autopod patterning. Overall, we  
31 identified 23 cell populations with distinct transcriptional profiles. Amongst them were small,  
32 albeit essential populations like the apical ectodermal ridge, demonstrating the ability to  
33 detect even rare cell types. Moreover, we uncovered the existence of molecularly distinct sub-  
34 populations within previously defined compartments of the developing limb, some of which  
35 have important signaling functions during autopod pattern formation. Finally, we inferred  
36 gene co-expression modules that coincide with distinct tissue types across developmental  
37 time, and used them to track patterning-relevant cell populations of the forming digits.

38 **Conclusions.** We provide a comprehensive functional genomics resource to study the  
39 molecular effectors of chicken limb patterning at cellular resolution. Our single-cell  
40 transcriptomic atlas captures all major cell populations of the developing autopod, and  
41 highlights the transcriptional complexity in many of its components. Finally, integrating our  
42 data-set with other single-cell transcriptomics resources will enable researchers to assess  
43 molecular similarities in orthologous cell types across the major tetrapod clades, and provide  
44 an extensive candidate gene list to functionally test cell-type-specific drivers of limb  
45 morphological diversification.

## 46 **Keywords**

47 scRNA-seq, Gene Expression, Cellular Transcriptomics, Autopod Patterning,  
48 Digits, Interdigit, Perichondrium, Phalanges  
49

## 50 **Background**

51 Embryonic pattern formation relies on the tight coordination of numerous developmental  
52 processes, across multiple scales of complexity. From seemingly homogenous progenitor  
53 populations, different cell types get specified and arranged in intricate patterns, to give rise to  
54 functional tissues and organs. As progenitors mostly share a common genome, this  
55 phenotypic specialization relies on the precise execution of distinct gene regulatory networks,  
56 to enable cell type specification and ensuing pattern formation [1–3]. Slight deviations in  
57 these processes contribute to morphological variations within natural populations. More  
58 profound aberrations, however, can cause malformations and ultimately result in death of the  
59 embryo. To buffer such fragile balance, many cell type specification and patterning processes  
60 rely on complex feedback mechanisms, through tightly interconnected molecular loops  
61 between spatially distinct signaling centers [4–6] Hence, integration of multiple signaling  
62 pathways across space and time define a molecular coordinate grid to instruct organogenesis  
63 at the tissue level. Ultimately, however, these multifaceted signaling inputs have to be  
64 incorporated at the cellular level, *via* cell type-specifying gene regulatory networks, as  
65 progenitor cells undergo spatially and temporally defined cell fate decisions to contribute to  
66 proper pattern formation.

67 Tetrapod limb development has long served as a model to study the genetic and molecular  
68 underpinnings of vertebrate pattern formation. Due to its non-essentiality for embryo survival,  
69 many fetuses carrying mutations that affect limb development make it to full term.  
70 Accordingly, human geneticists have been able to accumulate an impressive catalogue of  
71 candidate genes for limb patterning [7–9]. Combined with the easy accessibility of the limb in  
72 chicken embryos, and molecular genetic tools in the mouse, decades of experimental work  
73 have resulted in an in-depth understanding of many of the molecular mechanisms driving limb  
74 formation at the tissue scale [5]. Moreover, given the profound morphological diversifications  
75 the basic limb structure has experienced in numerous tetrapod clades, limb development has  
76 long attracted the interests of comparative developmental biologists using ‘EvoDevo’  
77 approaches [10]. This holds especially true for the most distal portion of the limb, the  
78 autopod, i.e. hands and feet. There, species-specific adaptations to distinct modes of  
79 locomotion have resulted in a diverse array of digit number formulas and individualized digit  
80 patterns [11–14].

81 Early in development, proliferation of a lateral plate mesoderm (LPM)-derived mesenchymal  
82 progenitor population drives overall limb bud outgrowth. Signaling crosstalk with a  
83 specialized structure of the distal overlaying ectoderm, the apical ectodermal ridge (AER),

Feregrino et al.

84 controls these dynamics. Concurrently, the major embryonic axes of the limb are defined by  
85 the coordinated action of multiple signaling centers [reviewed in 5]. As development  
86 progresses, LPM-derived progenitors start to differentiate into skeletal and other connective  
87 tissue types [15–17], while muscles cells originating from the somites migrate into the limb  
88 bud to complement formation of the musculoskeletal apparatus [18, 19]. For autopod pattern  
89 formation, digit numbers and identities are first defined by posteriorly restricted sonic  
90 hedgehog (SHH) activity, and altered by modulations therein [10, 14, 20, reviewed in 21].  
91 Digit elongation then relies on a specialized distal progenitor population, which supports  
92 outgrowth of individual digit bones, the phalanges [22, 23]. Digit-specific phalanx-formulas,  
93 and their stereotypic connection patterns *via* synovial joints, are established by signals  
94 emanating from the posterior interdigit mesenchyme [24, 25].

95 In this study, capitalizing on the power of droplet-based single-cell RNA-sequencing, we  
96 resolve the underlying transcriptional dynamics of autopod tissue formation and pattern  
97 emergence at single-cell resolution, across three stages of chicken hindlimb development. In  
98 total, we present transcriptomic data for 17,628 cells, allowing us to identify all major tissue  
99 types of the developing limb, as well as a substantial amount of molecular heterogeneity  
100 therein. Through weighted correlation network analysis, we define distinct gene co-expression  
101 modules that track corresponding tissue types across developmental time. Finally, we focus  
102 on the molecular make-up of cell populations involved in digit pattern formation and, hence,  
103 putative drivers of morphological diversification in the autopod.

104 Collectively, we present a comprehensive genomics resource that for the first time reveals the  
105 transcriptome dynamics of the developing chicken foot at cellular level. Our study identifies  
106 novel and known marker genes in co-expression modules of patterning-relevant cell  
107 populations, thereby providing an extensive catalogue of candidate genes for functional  
108 follow-up studies, to elucidate the molecular mechanisms of autopod pattern formation and  
109 diversification.

## 110 **Results**

### 111 **Single-cell sampling of the developing distal chicken limb**

112 To follow the appearance of patterning-relevant cell populations and their associated  
113 transcriptome dynamics, we sampled three developmental stages of the embryonic chicken  
114 foot: stage Hamburger-Hamilton 25 (HH25, ~4.5 days of development), stage HH29 (~6 days  
115 of development) and stage HH31 (~7 days of development). This time window spans key  
116 morphogenetic events that drive species-specific patterns in the developing autopod,  
117 particularly for the skeletal apparatus and its associated tissues. Namely, stage HH25 is  
118 dominated by overall autopod outgrowth and delineation of the main embryonic axes, at  
119 HH29 digit-specific patterns differentiate, and at HH31 digit elongation is phasing out. We  
120 designed our tissue sampling strategies accordingly. At HH25, we captured the entire distal  
121 part of the growing limb (Fig. 1a), at HH29 we dissected two digits with distinct skeletal  
122 formulas, digit 3 and 4, as well as their adjacent interdigit mesenchyme (Fig. 1b), and at  
123 HH31 we focused on the tip of digit 4 with its growth-relevant progenitor population (Fig.  
124 1c). We dissociated the micro-dissected tissue pieces using enzymatic digest combined with  
125 mechanical shearing and prepared single-cell suspensions for droplet-based high-throughput  
126 single-cell RNA-sequencing (*10X Genomics* and *Drop-Seq* [26, 27]). Using the corresponding  
127 bioinformatics pipelines, the resulting Next-Generation Sequencing libraries were mapped to  
128 the chicken genome, de-multiplexed according to their cellular barcodes and quantified to  
129 generate gene/cell read count tables. In total, we sampled over 17,000 cells and obtained  
130 single-cell transcriptomic profiles for 5,982 (HH25), 6,823 (HH29) and 4,823 (HH31)  
131 individual cells, respectively (Additional file 1: Fig. S1a). Quality-based exclusion of single-  
132 cell transcriptomes was implemented based on mean library size, percentage of mitochondrial  
133 reads and number of genes detected per cell. Additionally, data normalization as well as batch  
134 and cell cycle corrections were performed (for details, please refer to the *Methods* section).  
135 On average, we detected 2,879 unique molecular identifiers (UMIs) and 1,081 genes per cell  
136 (Additional file 1: Fig. S1b,c).

### 137 **Autopod tissue composition at cellular resolution**

138 Using unsupervised graph-based clustering, we identified 5, 10 and 5 clusters at stages HH25,  
139 HH29 and HH31, respectively. Projecting these clusters onto stage-specific tSNE (t-  
140 Distributed Stochastic Neighbor Embedding [28]), plots of our cellular transcriptomes  
141 revealed the presence of a dominant bulk of cells, with varying degrees of sub-structure, as  
142 well as distinct outlier groups (Fig. 1 d-f). Based on the expression of known marker genes  
143 and gene ontology (GO)-term enrichment analyses, we were able to attribute these broadly

Feregrino et al.

144 defined cell populations to distinct tissue types (Fig. 1g-f, Additional file 1: Fig. S1a and Fig.  
145 S2a-c). At stage HH25, they comprise a largely undifferentiated and proliferating  
146 mesenchymal population (red), early skeletal progenitors (blue), muscle cells invading the  
147 limb (black), as well as skin (purple) and blood cells (grey) (Fig. 1d,g). We recovered cell  
148 populations corresponding to those same five tissue types in our HH29 sample, with the  
149 exception that the “blood cluster” was now dominated by white blood cells and not  
150 erythrocytes. Additionally, we identified cell populations matching the interdigit mesenchyme  
151 (green), non-skeletal connective tissue (nsCT, maroon), cells enriched for markers of the very  
152 distal margin of the autopod mesoderm (“distal mesenchyme”, yellow), as well as endothelial  
153 (brown) and smooth muscle (orange) cells of the forming blood vessels (Fig. 1e,h). At stage  
154 HH31, we again find a largely undifferentiated mesenchymal population, the interdigit and  
155 distal margin mesenchyme, skeletal and skin cells (Fig. 1f,i). As expected according to our  
156 sampling strategy, for spatial and/or temporal context, we did not find all cell populations in  
157 every dataset. For example, while sample HH25 is biggest in relative size to the autopod, it is  
158 the earliest stage and thus predictably displayed the lowest cellular complexity. We observed  
159 the opposite trend in HH31, where the relative size is smallest but development more  
160 advanced. Our most complex dataset, in terms of cell number and tissue types identified, is  
161 from stage HH29. Collectively, using broad graph-based clustering and molecular profiling on  
162 our single-cell transcriptomics data, we catalogued the tissue composition of the developing  
163 autopod with cellular resolution, across three developmental stages.

#### 164 **Fine-scale clustering and marker gene expression across developmental time**

165 Although all expected major tissue types were recovered in our primary analyses, smaller cell  
166 populations, some well known to be essential for limb outgrowth and patterning, remained  
167 elusive. Hence, given our sampling depth, we next examined our data for additional sub-  
168 structure. Indeed, upon closer inspection using finer-tuned clustering parameters, we did find  
169 additional sub-populations with distinct transcriptional signatures (Fig. 2a-c, Additional file 1:  
170 Fig. S1a). Based on differential expression analyses, we identified marker genes for each of  
171 these sub-populations (Additional files 2-4). Certain sub-population/marker gene-  
172 combinations appeared to be conserved in all three samples, thereby allowing us to assign  
173 cellular equivalencies across developmental time (Fig. 2d-f). A subset of marker genes only  
174 showed loosely restricted expression patterns, likely a reflection of the largely  
175 undifferentiated state of the corresponding sub-population. For example, *PRRX1*, a well-  
176 established marker of the limb mesenchyme [16, 29, 30], and *PCNA*, active during DNA  
177 replication in proliferating cells [31], showed varying levels of expression beyond the

Feregrino et al.

178 proliferating mesenchyme sub-clusters. Such transcriptional ambiguities, however, seemed  
179 progressively lost, as mesenchymal progenitors committed to the different skeletal and non-  
180 skeletal lineages that define the emerging autopod patterns (Fig. 2d-f). As expected, cell sub-  
181 populations residing outside the LPM-lineage showed more pronounced transcriptome  
182 individualizations. For example, at HH25 the ectodermal ‘skin’ population got split into two  
183 distinct sub-clusters, one representing the bulk amount of the embryonic skin covering the  
184 autopod (sub-cluster 8), and the other corresponding to the apical ectodermal ridge (sub-  
185 cluster 7). Expression of its canonical marker *FGF8* and other highly enriched genes clearly  
186 established AER identity, demonstrating that even small cell populations can be successfully  
187 captured (Fig. 2d).

### 188 **Gene co-expression modules and corresponding tissue types**

189 To gain further insights into the regulatory programs that maintain these transcriptional  
190 signatures, and explore their potential biological significance, we tested for the occurrence of  
191 transcriptome-wide gene co-expression patterns using weighted correlation network analysis  
192 (WGCNA) [32]. This approach consists of an unsupervised clustering of genes based on their  
193 expression pattern across all cells, irrespective of the assigned cell or tissue type. In order to  
194 comprehensively screen for relevant gene co-expression modules, we conducted the analysis  
195 in our transcriptionally most complex sample at stage HH29. Starting with genes that showed  
196 high levels and variation of expression, we calculated an adjacency matrix and its topological  
197 overlap to construct a hierarchical tree. The resulting tree was cut to obtain a first set of gene  
198 co-expression modules. We then computed the first principal component of each module, to  
199 define so-called ‘module eigengenes’. For each individual gene, correlation to the respective  
200 eigengenes was used to assess module membership. Genes not significantly correlated with  
201 any eigengene were discarded, after which the entire process was repeated iteratively with a  
202 reduced gene set. Eventually, we identified a total of 836 genes grouped in 16 distinct gene  
203 co-expression modules, each designated by a color (Fig. 3a). Final module sizes ranged from  
204 15 to 215 genes (Additional file 5).

205 On a cell-by-cell basis, we calculated the average expression for each of the co-expression  
206 modules and visualized their distribution on our stage HH29 tSNE plot (Additional file 1: Fig.  
207 S3). Compared to our initial clustering of sample HH29, we found co-expression modules  
208 specifically enriched in the following cell populations: blood cells (module Black), skin  
209 (Blue), blood vessel endothelium (Brown), nsCT (Darkgrey), distal mesenchyme (Magenta),  
210 chondrocytes (Red and Turquoise) and muscle (Yellow). Interestingly, GO-terms associated  
211 with more broadly distributed modules enabled us to attribute the sub-clustering structure of

Feregrino et al.

212 certain tissues to particular biological processes. For example, HH29 mesenchyme sub-cluster  
213 5 showed higher activity for module Green, associated with GO-terms connected to mitosis,  
214 whereas sub-cluster 16 was enriched for module Pink, linked to G2/M-transition-related genes  
215 (Additional file 1: Fig. Fig. S3). Hence, we reasoned that distinct cell-cycle states underlie the  
216 subdivision of the proliferating mesenchyme cluster. Likewise, HH29 interdigit sub-clusters  
217 2, 6 and 12 were closely matched by the activities of modules Tan, Olivegreen, Orange and  
218 Midnightblue (see below, Fig. 4a-h).

219 To follow the developmental dynamics of the identified modules, we calculated their  
220 averaged activities across all the three sampled time points, and visualized similarities across  
221 time and tissue types using unsupervised hierarchical clustering (Fig. 3b). Indeed, despite  
222 differences in embryonic stages and experimental platforms, we were able to confirm  
223 corresponding cell and tissue types between our samples. For example, what we refer to as the  
224 “distal mesenchyme” is a population of cells characterized by high activity of the co-  
225 expression module Magenta at all time points (Fig. 3c-f). Comparisons to published  
226 expression patterns for *TFAP2B*, *WNT5A*, *MSX1* and *MSX2* confirmed its distal location and,  
227 based on those genes’ functions, suggested a role for this cell population in controlling distal  
228 autopod outgrowth. Using WGCNA thus enabled us to define equivalent cell populations  
229 across developmental time, and helped attribute biological functions at the sub-cluster level.

### 230 **Transcriptionally and spatially distinct sub-populations in the interdigit mesenchyme**

231 As expected by developmental stage, interdigit populations were only recovered in samples  
232 HH29 and HH31. In total, we identified four associated co-expression modules (Fig. 4a-d).  
233 High Orange and Olivegreen module activities were coinciding with the same interdigit sub-  
234 population (Fig. 4e,f), which was recognizable in both HH29 and HH31 samples and marked  
235 by *RDH10* expression (Fig. 2e,f). Noticeably, all genes with high membership in module  
236 Olivegreen were transcription factors (TFs), while module Orange was enriched for  
237 enzymatic activities (Fig. 4a,b). Both, however, scored high for GO-terms related to retinoic  
238 acid signaling, an important mediator of interdigit cell death [33]. Module Tan was enriched  
239 for skeletogenic and morphogenetic GO-terms, suggesting it might mediate some of the  
240 patterning information contained in the interdigit mesenchyme to the adjacently forming  
241 digits (Fig. 4c,g). Lastly, module Midnightblue showed multiple TFs and its activity was  
242 restricted to HH29 sub-cluster 2 (Fig. 4d,h).

243 Since relevant patterning information is contained in the interdigit, posteriorly adjacent to  
244 each forming digit, we next wondered whether some of the sub-clustering structure  
245 corresponded to spatially distinct interdigit populations along the anterior-posterior axis of the



Feregrino et al.

246 autopod. At HH29, we detected three interdigit sub-clusters (Fig. 4i). Using differential  
247 expression analyses, we defined marker genes that distinguish the three sub-clusters from  
248 each other (Fig. 4j). To assign putative spatial information to our single-cell interdigit  
249 transcriptomes, we reanalyzed a bulk RNA-seq dataset covering stages HH29 and HH31 of  
250 the developing chicken hindlimb autopod [34]. This dataset is based on dissections of  
251 individual digits, together with their posteriorly associated interdigit mesenchyme, and thus  
252 provided an opportunity to identify spatially resolved marker genes. We contrasted their  
253 transcriptomic data of digit/interdigit III against digit/interdigit IV and found a total of 54  
254 genes to be significantly differentially expressed at both developmental time points (Fig. 4k).  
255 Comparing the digit/interdigit IV-specific subset of these genes to our differential expression  
256 analysis of sub-cluster 2, and its affiliated module Midnightblue, we found an overlap of  
257 seven up-regulated genes (Fig. 4d,j, underlined). In contrast, we couldn't find any other  
258 digit/interdigit IV gene in the rest of the interdigit sub-cluster signatures or co-expression  
259 modules. We therefore concluded that HH29 sub-cluster 2 consisted of cells of the interdigit  
260 mesenchyme posterior to digit 4.

#### 261 **Developing digits and their associated tissues**

262 Of the cell populations directly contributing to the making of digits, a cluster reminiscent of  
263 the non-skeletal connective tissue, the nsCT, appeared in all of the samples. In our WGCNA  
264 analyses, we identified three modules, Darkgrey, Purple, and Darkgreen, which mapped to the  
265 nsCT sub-clusters (Fig. 5a-f). The Darkgrey module was most restricted, in both time and cell  
266 numbers, and its activity pattern closely matched the HH29 sub-cluster 4 (Fig. 5d). Cellular  
267 retinoic acid binding protein I *CRABP-I*, Aquaporin *AQP1*, *DKK2* and *GLT8D2* were the  
268 genes most strongly associated with this module. Modules Purple and Darkgreen showed  
269 more widespread activities (Fig. 5e,f), and centered on *COLIA2*, *DCN*, *KCNJ2*, *SALL1*, and  
270 *AKR1D1*, *PRRX1*, *TCF12*, *ZFHX3*. Comparing our differential expression analyses between  
271 the respective cell populations, only six genes appeared significantly enriched across all  
272 stages (Fig. 5g), five of which also appeared in our nsCT modules. Using *in situ* hybridization  
273 for the top-three of these genes, both differential expression- and module membership-wise,  
274 allowed us to attribute module activities to discrete nsCT domains along the developing  
275 skeletal elements. *CRABP-I* showed highest expression near and around the forming  
276 epiphysis, where synovial joints and ligament attachment sites develop (Fig. 5h). *COLIA2*-  
277 and *ZFHX3*-positive populations showed a graded distribution along the periskeletal tissue  
278 layer, predominantly marking the prospective periosteum and perichondrium domains,  
279 respectively (Fig. 5i,j).

Feregrino et al.

280 Finally, we identified skeletal progenitor populations at all three time points (Fig. 6a-c).  
281 According to the developmental stages we sampled, only cartilage-producing skeletal cells  
282 were recovered. In all three samples, we found a cell population resembling early  
283 chondrocytes (sub-clusters HH25-4, HH29-15 and HH31-2). At stages HH29 and HH31, a  
284 seemingly more mature chondrocyte type emerged (HH29-3, HH31-1), and an additional  
285 cartilaginous cluster was evident in the HH29 sample (HH29-17). Concomitantly, we  
286 identified two co-expression modules associated with these cell populations, Turquoise and  
287 Red (Fig 6d,e). Turquoise is centered on *CD24*, *CHGB* and *SULF1*, whereas module Red  
288 displays a core of collagens *COL9A1* and *COL9A3*, *MATN4*, *C9H2ORF82* (also known as  
289 *SNORC* in mammals), and *ACAN*. Based on additional marker genes and GO-term enrichment  
290 analyses, we inferred the Turquoise module to be related to early chondrocyte proliferation  
291 and growth, whereas the Red module reflected chondrocyte maturation and extracellular  
292 matrix deposition (Fig. 6f). Interestingly, compared to module Turquoise, the activity of  
293 module Red was generally more restricted and specifically excluded from sub-cluster HH29-  
294 17 (Fig. 6g,h). Upon closer inspection, we identified high expression of several known  
295 synovial joint markers genes in this population, thus identifying it as the forming  
296 interphalangeal joints (Fig. 6i, Additional file 3).  
297 Hence, through a combination of differential gene expression and GO-term enrichment  
298 analyses, as well as gene co-expression modules, we identified spatially and/or temporally  
299 distinct sub-populations and transcriptome dynamics in the skeletal and peri-skeletal tissues of  
300 the forming digits.

## 301 **Discussion**

### 302 **Single-cell tissue decomposition of the developing chicken autopod**

303 Here, using single-cell RNA-sequencing, we present a transcriptomic atlas of the developing  
304 chicken limb at cellular resolution. Focusing on the distal and morphologically diverse portion  
305 of the limb, the autopod, we sampled over 17,000 single-cell transcriptomes with an average  
306 of over 1,000 genes detected in each cell. Within our atlas, we identify all major tissue types  
307 that constitute and pattern the embryonic appendage across three developmental time points.  
308 Additionally, taking advantage of our cellular and transcriptomic sampling depth, we manage  
309 to isolate even minute cell populations like the AER and identify novel marker genes in it. We  
310 also distinguish transcriptionally discrete sub-populations within known major tissue types,  
311 reflecting distinct spatial locations or cellular states. As such, it demonstrates the power of  
312 scRNA-seq to molecularly disentangle cell populations of the developing limb that occur in  
313 close spatial or ‘lineage’ proximity. Historically, such populations have proven notoriously  
314 difficult to separate and characterize transcriptionally, using either manual tissue dissection or  
315 reporter-gene based cell lineage isolation. To what extent all of our tissue sub-clusters indeed  
316 correspond to distinct lineage separations [35], or rather represent the extremes of a molecular  
317 continuum that follows the inherently stochastic nature of transcription [36, 37], remains to be  
318 addressed in future studies. Regardless, however, our results provide a toolbox of candidate  
319 genes to tackle this question in a molecularly comprehensive manner. Furthermore, our data  
320 enables a characterization of emerging embryonic cell types based on transcriptional  
321 signatures, rather than relying on the definitive morphological and/or functional features of  
322 their mature counterparts.

### 323 **Cell type equivalencies across developmental and evolutionary time**

324 Such molecular classification schemes echo recent conceptual frameworks that aim to  
325 categorize ‘cell types’ across developmental and evolutionary time scales, irrespective of  
326 morphology or function [2]. If, however, we consider a ‘cell type’ to be primarily defined by  
327 the expression of distinct regulatory programs, then detection of program activities can  
328 substantially precede our ability to distinguish morphological or functional specializations.  
329 Indeed, our sub-clustering and module analyses across developmental time reveal the  
330 appearance of certain prospective cell types long before they become morphologically  
331 distinct. For example, already at stage HH25 we recover clear gene expression signatures  
332 reminiscent of the future periskeletal nsCT, even though prominent cartilage anlagen have yet  
333 to form (Fig. 2d, Fig. 3b). As such, it suggests an early lineage priming, without necessarily  
334 implying a definite switch in cell fate or clear morphological distinctions. In agreement with

Feregrino et al.

335 this, our *ZFH3*-containing module Darkgreen appears to be the most basic and least specific  
336 of the co-expression modules that coincide with the nsCT population. We detect its activity at  
337 all three time points, marking the prospective nsCT as well as parts of the *PRRX1*-positive  
338 mesenchymal progenitor population (Fig. 5c,f). Only later do more mature and restricted  
339 nsCT sub-divisions and their corresponding co-expression modules occur, as exemplified by  
340 the activity of module Darkgrey and some of its members known to be involved in the  
341 formation of periskeletal tissues and tendon attachment sites (Fig. 5a,d) [38, 39].

342 Moreover, combining such transcriptome-based ‘cell type’ classification schemes with  
343 comparative scRNA-seq datasets allows for a molecular assessment of homologous cell types  
344 between species, across evolutionary time scales [40, 41]. This has important implications  
345 when trying to elucidate the impact of cell type-specifying gene regulatory networks on  
346 pattern formation and diversification at its relevant cellular scale. Namely, how progenitor  
347 populations exactly perceive and process patterning-relevant cues can be modulated by  
348 species-specific alterations in the respective cell type-specifying networks. In this context, it  
349 is worth noting that we detect *RSPO3* as one of the main markers of the chicken AER (Fig.  
350 2d, Additional file 2). R-spondins, a family of secreted ligands involved in WNT-signaling,  
351 have previously been implicated in AER maintenance and control of limb outgrowth.  
352 However, in mammals only *RSPO2*, and not *RSPO3*, seems to be implicated in AER function  
353 [42–44]. Similarly, species-specific modifications in the gene regulatory networks driving  
354 skeletal cell type maturation have been reported [45, 46]. Together with recent scRNA-seq  
355 studies in other vertebrate model organisms [30, 47, 48], our dataset now opens new avenues  
356 for a comprehensive assessment of molecular similarities and divergences in patterning-  
357 relevant cell populations of the developing limb, across all major tetrapod clades.

### 358 **Digit growth and patterning at cellular resolution**

359 Variations in digit number, size and individual digit patterns in the autopod skeletal structure  
360 reflect functional specialization of tetrapod hands and feet. During development,  
361 condensations of mesenchymal cells first give rise to early skeletogenic progenitors, to then  
362 differentiate into distinct skeletal lineages such as chondrocytes, osteocytes or synovial joint  
363 cells [49–51]. However, unlike for skeletal elements at more proximal locations of the limb,  
364 individual phalanx condensations are sequentially added and expanded at the distal tip of each  
365 forming digit, through proliferation of an evolutionary conserved progenitor population [22,  
366 23, 52]. Hence, identifying regulators of growth rates, as well as for the relative temporal  
367 sequence at which the different skeletal cell types are specified, becomes paramount when  
368 trying to understand digit-specific phalanx patterns [25, 53].

Feregrino et al.

369 Early autopod outgrowth, and later digit elongation, is controlled through complex signaling  
370 interactions at the distal margin of the limb, involving the concerted action of FGFs, BMPs  
371 and WNTs [reviewed 5]. Coinciding with this distal domain, we identify a distinct sub-  
372 population of mesenchymal cell types in all of our samples, marked by elevated activity of  
373 module Magenta with *TFAP2B*, *WNT5A* and high BMP signaling (Fig. 3c-f). Certain module  
374 members have been functionally implied in regulating autopod growth and digit elongation  
375 [24, 54–56], yet others remain completely unexplored in this context.

376 Moreover, we identify distinct sub-populations of interdigit mesenchyme cells in our HH29  
377 and HH31 samples, with four associated gene co-expression modules (Fig. 4a-h). Module  
378 Olivegreen contains *SNAI* and *ID* genes, known to be expressed in interdigits, and likely  
379 relates to the various BMP-driven processes in this tissue [57–62]. On the other hand, module  
380 Orange is dominated by *RDH10*, implicated in mouse interdigital apoptosis [63]. Before its  
381 apoptotic disappearance at later stages of development, interdigit mesenchyme is known to  
382 instruct the specific phalanx-formulas of its anteriorly adjacent digit [24, 25]. Moreover, we  
383 manage to spatially attribute a distinct co-expression module (Midnightblue) to interdigit 4,  
384 i.e. posterior to a digit with known regulatory individualization in tetrapods [64].

385 Finally, across all developmental time points we sampled, we identify skeletogenic cell  
386 populations. At those stages, the forming skeletal elements still consist exclusively of early  
387 progenitors, maturing chondrocytes, and developing synovial joints. Accordingly, we only  
388 find three distinct sub-populations, associated with two co-expression modules. Module Red  
389 shows enrichment for many canonical markers of chondrocyte maturation (Fig. 6e) [45, 51].  
390 On the other hand, genes in module Turquoise do not, for the most part, evoke a classical  
391 chondrogenic transcriptional profile (Fig. 6d). Again, this module might rather reflect an early  
392 transcriptional priming, only this time towards the skeletogenic lineage. In agreement with  
393 this, we only detect low expression levels for the canonical early skeletogenic marker *SOX9* in  
394 HH25 sub-cluster 4 (Fig. 2d), which itself is specifically enriched for Turquoise activity.  
395 Likewise, our synovial joint-like HH29 sub-cluster 17 shows high activity for Turquoise,  
396 while excluding the more mature chondrocyte module Red (Fig. 6g-i).

## 397 **Conclusion**

398 Our single-cell transcriptomic atlas provides a comprehensive genomics resource to study  
399 chicken limb development in unprecedented detail. Thereby, it complements a classical  
400 experimental model of vertebrate pattern formation with molecular data at cellular resolution.  
401 We curate molecular catalogues to provide an in-depth description of the embryonic autopod,  
402 through the assembly of cell population-specific lists of candidate marker genes. Combined

Feregrino et al.

403 with the power of viral overexpression screens and recent CRISPR/*Cas9* genome  
404 modifications technologies, this resource will provide a roadmap for the functional  
405 elucidation of cell type specification programs in patterning-relevant populations. Moreover,  
406 by constructing cell population-specific gene co-expression modules, we provide a tool to  
407 follow tissue dynamics across developmental and evolutionary time scales. Thereby, it will  
408 enable insights into the molecular underpinnings of homologous cell types across all major  
409 tetrapod clades, and their ensuing developmental impact on pattern formation and  
410 diversification in the vertebrate autopod.

## 411 **Methods**

### 412 **Tissue sampling**

413 We collected tissue samples from embryonic hind limbs at different developmental stages  
414 (Fig. 1,a-c). Limbs were dissected in cold PBS, and chopped coarsely with a razorblade.  
415 Dissociation into single cells was done using 2.5% trypsin in DMEM and incubation for 15  
416 minutes at 37°. Occasional mechanical shearing by careful pipetting was applied during the  
417 incubation time.

### 418 **scRNA-seq library preparation**

419 Single-cell suspensions of samples HH25 and HH31 were fed into a *10X Genomics*  
420 *Chromium* Single Cell System (*10X Genomics*, Pleasanton, CA, USA) aiming for a  
421 concentration of 4000 cells per microliter. Cell capture, cDNA generation, preamplification  
422 and library preparation were done using *Chromium Single Cell 3' v2* Reagent Kit according to  
423 the manufacturer instructions. For stage HH29 the cells were processed with the *DropSeq*  
424 method according to the original protocol [26]. Once the cDNA was obtained from all the  
425 samples, the sequencing proceeded on Illumina *NextSeq 500* platforms as recommended by  
426 the developers at 75bp and an average depth of 400 million reads per sample.

### 427 **Data processing**

428 Using either the *Cell Ranger* software v2 (*10X Genomics*) or the *DropSeq* pipeline v1  
429 (<https://github.com/broadinstitute/Drop-seq/releases>) we performed base calling, adaptor  
430 trimming, mapping to the chicken ENSEMBL genome assembly and annotation  
431 *Gallus\_gallus-5.0* [65], de-multiplexing of the sequences and generation of the gene / cell  
432 count matrices.

433 Filtering thresholds for mapped data were adapted for each sample, depending on the different  
434 library complexities. Cells with an UMI count of more than 4 times the sample mean or less  
435 than 20% of the sample median were filtered out, cells with a mitochondrial or ribosomal  
436 contribution to UMI count of more than 10% were also filtered out. Using the R package  
437 *Seurat* v2.3.2 [66] the UMI counts were then Log-normalized and any variation due to the  
438 library size or mitochondrial UMI counts percentage was then regressed via a variance  
439 correction using the function *ScaleData*.

440 The cell cycle stage of each cell was inferred using the R package *SCRAN* [67] and gene  
441 pairs that covariate with cell cycle stages in mouse [68]. The gene pairs were translated to  
442 orthologous chicken genes [69] and a cell cycle stage score was obtained cell-wise for stages  
443 S, G1 and G2/M, the difference between the G2/M and S scores ( $\delta G2M/S$ ) was calculated to  
444 be accounted for in later steps.

Feregrino et al.

#### 445 **Dimensionality reduction and visualization**

446 Significant principal components were determined for each sample as those falling outside of  
447 a Marchenko-Pastur distribution [35]. A dimensionality reduction step was carried out, using  
448 the t-SNE algorithm [28] to visualize the data and clustering of the cells based on  
449 transcriptomic similarities. The cells were clustered using the Louvain method for community  
450 detection from large networks and the Jaccard similarity coefficient to compare similarity and  
451 diversity of the sets, implemented in the FindClusters function in Seurat using data which was  
452 additionally variance-corrected for  $\delta G2M/S$ . A first, broad, clustering step was done using a  
453 resolution of 0.4 for samples HH31 and HH29 and 0.5 for HH25; a second clustering was  
454 done to find sub-clusters within the data, this time using resolutions of 1.4 and 1.1 for the  
455 corresponding samples. All clustering steps were done using a k number of 20 and the  
456 significant principal components of the sample.

#### 457 **Differential expression analysis**

458 Differential expression analyses based on the negative binomial distribution were performed  
459 with Seurat, using the  $\delta G2M/S$  as a covariate and only genes expressed in at least 15% of any  
460 compared population (Additional files 2-4); genes expressed in at least 25% of the cells and  
461 showing differences with a log fold-change  $> 0.5$  and an adjusted p value  $< 0.05$  were used  
462 for GO analyses. To find expression signatures for every cell cluster, in a first step, a  
463 phylogenetic tree was obtained for the cell clusters in each sample; all directly paired clusters  
464 were tested for differential expression. Any pair of clusters with less than 15 differentially  
465 expressed genes were collapsed recursively. In a second step, specific genes for each cluster  
466 were obtained contrasting each cluster against the rest of the cells in their sample. To find  
467 genes differentially expressed genes between the interdigit clusters (Fig. 4j), we compared  
468 each of the sub-clusters against the rest of the cells in the other two clusters.

469 Marker genes for digit/interdigit 3 and 4 were defined using the DESeq2 R package v1.20.0  
470 [70]. We analyzed bulk RNA data sets of digit/interdigit 3 and 4 from stage HH28/29 and  
471 HH31 of a previous study [34]. After normalization based on size factors and dispersion, we  
472 performed the differential expression analysis using a Wald test and the contrast design  
473  $\sim \text{Stage} + \text{Digit}$  to use the different stages as pseudo-replicates of the digit. We filtered for  
474 differential expression with a p-value  $< 0.05$ . For visualization, we subtracted the fold  
475 changes of early and late stages and plotted a heatmap using heatmap3 R package v1.1.1 [71]  
476 using hierarchical clustering of the genes.

#### 477 **Weighted co-expression analyses**



Feregrino et al.

478 A weighted correlation network analysis was done using the WGCNA R package v1.6.6 [32].  
479 Using the function FindVariableGenes from Seurat, we calculated the genes with high  
480 variation (dispersion > 0.5) across all the cells in sample HH29, and were subsequently used  
481 in WGCNA. Adjacencies and signed topological overlaps were calculated with an inferred  
482 soft-thresholding power of 8. A hierarchical tree was constructed using the “average” method  
483 and then cut using the “tree” method at height 0.9957 and minimum module size of 15. The  
484 eigengenes of the resulting modules, as well as the membership and a Correlation Student p  
485 value of the membership of each gene to its module were calculated. All genes not  
486 significantly (p value >0.01) correlated with any module were discarded. The process was  
487 repeated recursively, until all genes were significantly associated with a module; the only  
488 change made in every iteration was the module minimum size, set to the smallest that would  
489 yield at least the same number of modules as the first analysis.

490 The output of WGCNA was exported to the Cytoscape v3.7.0 software [72] where the node  
491 size was coded to represent the membership, and the edge thickness and color intensity to  
492 represent the weights of each gene-pair coexpression. For visualization purposes, the scales of  
493 thickness, color and size were made relative to the minima and maxima found in each  
494 network. Furthermore, a transparency gradient was added to the edges, which was scaled to  
495 hide unimportant edges and avoid edge saturation, the threshold was always adjusted to make  
496 visible at least one edge per node. In only one case (module midnightblue), an edge with an  
497 outlier weight was coded to be red and thicker than any other edge, and the color/size re-  
498 scaled to the second highest weight.

#### 499 **Gene Ontology**

500 Gene Ontology analyses were conducted with the R package *limma* [73]. We used the list of  
501 genes in the expression signature of each computed cell cluster, and the genes members of  
502 each co-expression module as input. For each case we used all the genes detected in the  
503 corresponding sample as the contrast universe.

#### 504 ***In situ* hybridization**

505 Probes for *CRABP-I* and *COLIA2* were described previously [38]. Primers for the *ZFH3*  
506 probe were designed using primer3 [74]. An AA overhang and an *EcoRI* restriction site were  
507 added to each of the primers at the 5' end. *ZFH3* (fw: [5'-  
508 AAGAATTCAGCCGTACCGGGTGCAATGAGC-3'], rev: [5'-  
509 AAGAATTCAGCGCTTCCTCTTCCCGTAGAGC-3']). *In situ* hybridization was  
510 performed using standard protocols [75]

#### 511 **Abbreviations**

Feregrino et al.

- 512 **EvoDevo:** Evolutionary developmental biology
- 513 **LPM:** Lateral plate mesoderm
- 514 **AER:** Apical ectodermal ridge
- 515 **HH:** Hamburger-Hamilton stages
- 516 **UMIs:** Unique molecular identifiers
- 517 **tSNE:** t-distributed stochastic neighbor embedding
- 518 **GO:** Gene ontology
- 519 **nsCT:** Non-skeletal connective tissue
- 520 **TFs:** Transcription factors
- 521 **scRNA-seq:** Single-cell RNA sequencing

Feregrino et al.

522 **Declarations**

523 **Funding**

524 Work in the Tschopp laboratory is supported by the Swiss National Science Foundation  
525 (SNSF project grant 31003A\_170022), the University of Basel and the *Forschungsfonds* of  
526 the University of Basel. These funding bodies had no role in the design of the study,  
527 collection, analysis, and interpretation of data, and in writing the manuscript.

528 **Availability of data and materials**

529 All data generated or analyzed during this study are included in this published article and its  
530 supplementary information files. Raw sequencing data has been deposited in the SRA  
531 (accession numbers: TBD)

532 **Authors' contributions**

533 PT conceived and designed the study. CF, OP and PT conducted the scRNA-seq experiments.  
534 CF conducted data analyses and *in situ* experiments. CF and FS conducted the bulk RNA-seq  
535 re-analysis. CF and PT drafted the manuscript. All of the authors read and approved the final  
536 manuscript.

537 **Ethics approval and consent to participate**

538 In accordance with Swiss national guidelines (Swiss Animal Protection Ordinance; TSchV,  
539 chapter 6, Art. 112), no formal ethics approval was required, as all experiments were carried  
540 out prior to the third trimester of incubation.

541 **Consent for publication**

542 Not applicable.

543 **Competing interests**

544 The authors declare they have no competing interests.

545 **Acknowledgements**

546 Calculations were performed at sciCORE (<http://scicore.unibas.ch/>) scientific computing  
547 center at University of Basel. CF and PT wish to acknowledge Katja Eschbach and Christian  
548 Beisel for help with *10X Genomics Chromium* and sequencing. OP and PT thank Tyler Burks  
549 for help with *DropSeq* experiments. PT and OP would like to acknowledge the generous  
550 support of Cliff Tabin and Aviv Regev, in whose labs this project was initiated (with help of  
551 NIH grant HD03443 to Cliff Tabin).

552

## 553 **Bibliography**

- 554 1. Stathopoulos A, Levine M. Genomic regulatory networks and animal development.  
555 *Developmental Cell*. 2005.
- 556 2. Arendt D, Musser JM, Baker CVH, Bergman A, Cepko C, Erwin DH, Pavlicev M,  
557 Schlosser G, Widder S, Laubichler MD, Wagner GP. The origin and evolution of cell types.  
558 *Nat Rev Genet*. 2016;17:744–57.
- 559 3. Moris N, Pina C, Arias AM. Transition states and cell fate decisions in epigenetic  
560 landscapes. *Nature Reviews Genetics*. 2016.
- 561 4. Eldar A, Dorfman R, Weiss D, Ashe H, Shilo DZ, Barkal N. Robustness of the BMP  
562 morphogen gradient in *Drosophila* embryonic patterning. *Nature*. 2002.
- 563 5. Zeller R, Ríos JL, Zuniga A. Vertebrate limb bud development : moving towards  
564 integrative analysis of organogenesis. *Nat Rev Genet*. 2009;10:845–58.
- 565 6. Perrimon N, Pitsouli C, Shilo B-Z. Signaling Mechanisms Controlling Cell Fate and  
566 Embryonic Patterning. *Cold Spring Harb Perspect Biol*. 2012;4:a005975–a005975.
- 567 7. Biesecker LG. Polydactyly: How many disorders and how many genes? 2010 update.  
568 *Developmental Dynamics*. 2011.
- 569 8. Stricker S, Mundlos S. Mechanisms of digit formation: Human malformation syndromes  
570 tell the story. *Developmental Dynamics*. 2011.
- 571 9. Zuniga A, Zeller R, Probst S. The molecular basis of human congenital limb  
572 malformations. *Wiley Interdisciplinary Reviews: Developmental Biology*. 2012.
- 573 10. Petit F, Sears KE, Ahituv N. Limb development: A paradigm of gene regulation. *Nat Rev*  
574 *Genet*. 2017;18:245–58.
- 575 11. Fedak TJ, Hall BK. Perspectives on hyperphalangy: Patterns and processes. *Journal of*  
576 *Anatomy*. 2004.
- 577 12. Sears KE, Behringer RR, Rasweiler JJ, Niswander LA. Development of bat flight:  
578 Morphologic and molecular evolution of bat wing digits. *Proc Natl Acad Sci*. 2006.
- 579 13. De Bakker MAG, Fowler DA, Oude K Den, Dondorp EM, Carmen Garrido Navas M,  
580 Horbanczuk JO, Sire JY, Szczerbińska D, Richardson MK. Digit loss in archosaur evolution  
581 and the interplay between selection and constraints. *Nature*. 2013.
- 582 14. Cooper KL, Sears KE, Uygur A, Maier J, Baczkowski KS, Brosnahan M, Antczak D,  
583 Skidmore JA, Tabin CJ. Patterning and post-patterning modes of evolutionary digit loss in  
584 mammals. *Nature*. 2014.
- 585 15. Wachtler F, Christ B, Jacob HJ. On the determination of mesodermal tissues in the avian  
586 embryonic wing bud. *Anat Embryol (Berl)*. 1981.

Feregrino et al.

- 587 16. Logan M, Martin JF, Nagy A, Lobe C, Olson EN, Tabin CJ. Expression of Cre  
588 Recombinase in the developing mouse limb bud driven by a Prxl enhancer. *Genesis*. 2002.
- 589 17. Pearse R V., Scherz PJ, Campbell JK, Tabin CJ. A cellular lineage analysis of the chick  
590 limb bud. *Dev Biol*. 2007.
- 591 18. Chevallier A, Kieny M, Mauger A. Limb-somite relationship: origin of the limb  
592 musculature. *J Embryol Exp Morphol*. 1977.
- 593 19. Christ B, Jacob HJ, Jacob M. Experimental analysis of the origin of the wing musculature  
594 in avian embryos. *Anat Embryol (Berl)*. 1977.
- 595 20. Riddle RD, Johnson RL, Laufer E, Tabin C. Sonic hedgehog mediates the polarizing  
596 activity of the ZPA. *Cell*. 1993.
- 597 21. Lopez-Rios J, Duchesne A, Speziale D, Andrey G, Peterson KA, Germann P, et al.  
598 Attenuated sensing of SHH by Ptch1 underlies evolution of bovine limbs. *Nature*. 2014.
- 599 22. Montero JA, Lorda-Diez CI, Gañan Y, Macias D, Hurlle JM. Activin/TGF $\beta$  and BMP  
600 crosstalk determines digit chondrogenesis. *Dev Biol*. 2008.
- 601 23. Suzuki T, Hasso SM, Fallon JF. Unique SMAD1/5/8 activity at the phalanx-forming  
602 region determines digit identity. *Proc Natl Acad Sci U S A*. 2008;105:4185–90.
- 603 24. Dahn RD, Fallon JF. Interdigital regulation of digit identity and homeotic transformation  
604 by modulated BMP signaling. *Science (80- )*. 2000.
- 605 25. Huang BL, Trofka A, Furusawa A, Norrie JL, Rabinowitz AH, Vokes SA, Taketo MM,  
606 Zakany J, Mackem S. An interdigit signalling centre instructs coordinate phalanx-joint  
607 formation governed by 5'Hoxd-Gli3 antagonism. *Nat Commun*. 2016;7:1–10.
- 608 26. Macosko EZ, Basu A, Satija R, Nemesh J, Shekhar K, Goldman M, Tirosh I, Bialas AR,  
609 Kamitaki N, Martersteck EM, Trombetta JJ, Weitz DA, Sanes JR, Shalek AK, Regev A,  
610 McCarroll SA. Highly Parallel Genome-wide Expression Profiling of Individual Cells Using  
611 Nanoliter Droplets. *Cell*. 2015;161:1202–14.
- 612 27. Zheng GXY, Terry JM, Belgrader P, Ryvkin P, Bent ZW, Wilson R, et al. Massively  
613 parallel digital transcriptional profiling of single cells. *Nat Commun*. 2017;8:1–12.
- 614 28. Van Der Maaten LJP, Hinton GE. Visualizing high-dimensional data using t-sne. *J Mach*  
615 *Learn Res*. 2008;9:2579–605.
- 616 29. Cserjesi P, Lilly B, Bryson L, Wang Y, Sassoon DA, Olson EN. MHox: a mesodermally  
617 restricted homeodomain protein that binds an essential site in the muscle creatine kinase  
618 enhancer. *Development*. 1992.
- 619 30. Gerber T, Murawala P, Knapp D, Masselink W, Schuez M, Hermann S, Gac-Santel M,  
620 Nowoshilow S, Kageyama J, Khattak S, Currie JD, Camp JG, Tanaka EM, Treutlein B.

Feregrino et al.

- 621 Single-cell analysis uncovers convergence of cell identities during axolotl limb regeneration.  
622 *Science* (80- ). 2018;362.
- 623 31. Bravo R, Frank R, Blundell PA, Macdonald-Bravo H. Cyclin/PCNA is the auxiliary  
624 protein of DNA polymerase- $\delta$ . *Nature*. 1987.
- 625 32. Langfelder P, Horvath S. WGCNA: An R package for weighted correlation network  
626 analysis. *BMC Bioinformatics*. 2008;9.
- 627 33. Dupé V, Ghyselinck NB, Thomazy V, Nagy L, Davies PJA, Chambon P, Mark M.  
628 Essential roles of retinoic acid signaling in interdigital apoptosis and control of BMP-7  
629 expression in mouse autopods. *Dev Biol*. 1999.
- 630 34. Wang Z, Young RL, Xue H, Wagner GP. Transcriptomic analysis of avian digits reveals  
631 conserved and derived digit identities in birds. *Nature*. 2011;477:583–7.
- 632 35. Shekhar K, Lapan SW, Whitney IE, Tran NM, Macosko EZ, Kowalczyk M, Adiconis X,  
633 Levin JZ, Nemesh J, Goldman M, McCarroll SA, Cepko CL, Regev A, Sanes JR.  
634 Comprehensive Classification of Retinal Bipolar Neurons by Single-Cell Transcriptomics.  
635 *Cell*. 2016;166:1308–1323.e30.
- 636 36. Nicolas D, Phillips NE, Naef F. What shapes eukaryotic transcriptional bursting?  
637 *Molecular BioSystems*. 2017.
- 638 37. Urban EA, Johnston RJ. Buffering and Amplifying Transcriptional Noise During Cell  
639 Fate Specification. *Front Genet*. 2018;9 November:1–14.
- 640 38. Bandyopadhyay A, Kubilus JK, Crochiere ML, Linsenmayer TF, Tabin CJ. Identification  
641 of unique molecular subdomains in the perichondrium and periosteum and their role in  
642 regulating gene expression in the underlying chondrocytes. *Dev Biol*. 2008.
- 643 39. Witte F, Dokas J, Neuendorf F, Mundlos S, Stricker S. Comprehensive expression  
644 analysis of all Wnt genes and their major secreted antagonists during mouse limb  
645 development and cartilage differentiation. *Gene Expr Patterns*. 2009.
- 646 40. Marioni JC, Arendt D. How Single-Cell Genomics Is Changing Evolutionary and  
647 Developmental Biology. *Annu Rev Cell Dev Biol*. 2017;33:537–53.
- 648 41. Tschopp P, Tabin CJ. Deep homology in the age of next-generation sequencing.  
649 *Philosophical Transactions of the Royal Society B: Biological Sciences*. 2017.
- 650 42. Nam JS, Park E, Turcotte TJ, Palencia S, Zhan X, Lee J, Yun K, Funk WD, Yoon JK.  
651 Mouse R-spondin2 is required for apical ectodermal ridge maintenance in the hindlimb. *Dev*  
652 *Biol*. 2007.
- 653 43. Neufeld S, Rosin JM, Ambasta A, Hui K, Shaneman V, Crowder R, Vickerman L, Cobb J.  
654 A conditional allele of Rspo3 reveals redundant function of R-spondins during mouse limb

Feregrino et al.

- 655 development. *Genesis*. 2012.
- 656 44. Szenker-Ravi E, Altunoglu U, Leushacke M, Bosso-Lefèvre C, Khatoor M, Thi Tran H, et  
657 al. RSPO2 inhibition of RNF43 and ZNRF3 governs limb development independently of  
658 LGR4/5/6. *Nature*. 2018.
- 659 45. Gómez-Picos P, Eames BF. On the evolutionary relationship between chondrocytes and  
660 osteoblasts. *Frontiers in Genetics*. 2015.
- 661 46. Ferguson GB, Van Handel B, Bay M, Fiziev P, Org T, Lee S, et al. Mapping molecular  
662 landmarks of human skeletal ontogeny and pluripotent stem cell-derived articular  
663 chondrocytes. *Nat Commun*. 2018.
- 664 47. Fabre PJ, Leleu M, Mascrez B, Giudice Q Lo, Cobb J, Duboule D. Single-cell mRNA  
665 profiling reveals heterogeneous combinatorial expression of Hoxd genes during limb  
666 development. *BMC Biol*. 2018;:327619.
- 667 48. Cao J, Spielmann M, Qiu X, Huang X, Ibrahim DM, Hill AJ, Zhang F, Mundlos S,  
668 Christiansen L, Steemers FJ, Trapnell C, Shendure J. The single-cell transcriptional landscape  
669 of mammalian organogenesis. *Nature*. 2019.
- 670 49. Hartmann C, Tabin CJ. Wnt-14 plays a pivotal role in inducing synovial joint formation in  
671 the developing appendicular skeleton. *Cell*. 2001.
- 672 50. Akiyama H, Kim J-E, Nakashima K, Balmes G, Iwai N, Deng JM, Zhang Z, Martin JF,  
673 Behringer RR, Nakamura T, de Crombrughe B. Osteo-chondroprogenitor cells are derived  
674 from Sox9 expressing precursors. *Proc Natl Acad Sci*. 2005.
- 675 51. Kozhemyakina E, Lassar AB, Zelzer E. A pathway to bone: signaling molecules and  
676 transcription factors involved in chondrocyte development and maturation. *Development*.  
677 2015.
- 678 52. Witte F, Chan D, Economides AN, Mundlos S, Stricker S. Receptor tyrosine kinase-like  
679 orphan receptor 2 (ROR2) and Indian hedgehog regulate digit outgrowth mediated by the  
680 phalanx-forming region. *Proc Natl Acad Sci*. 2010.
- 681 53. Hiscock TW, Tschopp P, Tabin CJ. On the Formation of Digits and Joints during Limb  
682 Development. *Developmental Cell*. 2017.
- 683 54. Sanz-Ezquerro JJ, Tickle C. Fgf Signaling Controls the Number of Phalanges and Tip  
684 Formation in Developing Digits. *Curr Biol*. 2003.
- 685 55. Gros J, Hu JKH, Vinegoni C, Feruglio PF, Weissleder R, Tabin CJ. WNT5A/JNK and  
686 FGF/MAPK pathways regulate the cellular events shaping the vertebrate limb bud. *Curr Biol*.  
687 2010.
- 688 56. Seki R, Kitajima K, Matsubara H, Suzuki T, Saito D, Yokoyama H, Tamura K. AP-2 $\beta$  is a

Feregrino et al.

- 689 transcriptional regulator for determination of digit length in tetrapods. *Dev Biol.* 2015.
- 690 57. Jen Y, Manova K, Benezra R. Expression patterns of Id1, Id2, and Id3 are highly related  
691 but distinct from that of Id4 during mouse embryogenesis. *Dev Dyn.* 1996.
- 692 58. Ros MA, Sefton M, Nieto MA. Slug, a zinc finger gene previously implicated in the early  
693 patterning of the mesoderm and the neural crest, is also involved in chick limb development.  
694 *Development.* 1997.
- 695 59. Nieto MA. The snail superfamily of zinc-finger transcription factors. *Nature Reviews*  
696 *Molecular Cell Biology.* 2002.
- 697 60. Zuzarte-Luís V, Hurlé JM. Programmed cell death in the developing limb. *Int J Dev Biol.*  
698 2002.
- 699 61. Lorda-Diez CI, Torre-Pérez N, García-Porrero JA, Hurlé JM, Montero JA. Expression of  
700 Id2 in the developing limb is associated with zones of active BMP signaling and marks the  
701 regions of growth and differentiation of the developing digits. *Int J Dev Biol.* 2009.
- 702 62. Pignatti E, Zeller R, Zuniga A. To BMP or not to BMP during vertebrate limb bud  
703 development. *Seminars in Cell and Developmental Biology.* 2014.
- 704 63. Cunningham TJ, Chatzi C, Sandell LL, Trainor PA, Duester G. Rdh10 mutants deficient  
705 in limb field retinoic acid signaling exhibit normal limb patterning but display interdigital  
706 webbing. *Dev Dyn.* 2011.
- 707 64. Stewart TA, Liang C, Cotney J, Noonan JP, Sanger T, Wagner G. Evidence against  
708 tetrapod-wide digit identities and for a limited frame shift in bird wings. *bioRxiv.*  
709 2018;:224147.
- 710 65. Zerbino DR, Achuthan P, Akanni W, Amode MR, Barrell D, Bhai J, et al. Ensembl 2018.  
711 *Nucleic Acids Res.* 2017; December 2017:1–8.
- 712 66. Butler A, Hoffman P, Smibert P, Papalexi E, Satija R. Integrating single-cell  
713 transcriptomic data across different conditions, technologies, and species. *Nat Biotechnol.*  
714 2018.
- 715 67. Lun ATL, McCarthy DJ, Marioni JC. A step-by-step workflow for low-level analysis of  
716 single-cell RNA-seq data with Bioconductor. *F1000Research.* 2016;5:2122.
- 717 68. Scialdone A, Natarajan KN, Saraiva LR, Proserpio V, Teichmann SA, Stegle O, Marioni  
718 JC, Buettner F. Computational assignment of cell-cycle stage from single-cell transcriptome  
719 data. *Methods.* 2015;85:54–61.
- 720 69. Durinck S, Spellman PT, Birney E, Huber W. Mapping identifiers for the integration of  
721 genomic datasets with the R/ Bioconductor package biomaRt. *Nat Protoc.* 2009;4:1184–91.
- 722 70. Love MI, Huber W, Anders S. Moderated estimation of fold change and dispersion for



Feregrino et al.

- 723 RNA-seq data with DESeq2. *Genome Biol.* 2014.
- 724 71. Zhao S, Guo Y, Sheng Q, Shyr Y. Heatmap3: an improved heatmap package with more  
725 powerful and convenient features. *BMC Bioinformatics.* 2014.
- 726 72. Shannon P, Markiel A, Ozier O, Baliga NS, Wang JT, Ramage D, Amin N, Schwikowski  
727 B, Ideker T. Cytoscape: A software Environment for integrated models of biomolecular  
728 interaction networks. *Genome Res.* 2003.
- 729 73. Ritchie ME, Phipson B, Wu D, Hu Y, Law CW, Shi W, Smyth GK. limma powers  
730 differential expression analyses for RNA-sequencing and microarray studies. *Nucleic Acids*  
731 *Res.* 2015;43:e47.
- 732 74. Rozen S, Skaletsky H. Primer3 on the WWW for General Users and for Biologist  
733 Programmers In: Krawetz S, Misener S (eds) *Methods and protocols: methods in molecular*  
734 *biology.* Totowa, NJ Humana Press. 2000.
- 735 75. McGlenn E, Mansfield JH. Detection of Gene Expression in Mouse Embryos and Tissue  
736 Sections. In: Pelegri FJ, editor. *Vertebrate Embryogenesis: Embryological, Cellular, and*  
737 *Genetic Methods.* Totowa, NJ: Humana Press; 2011. p. 259–92.

738 **Figures**

739

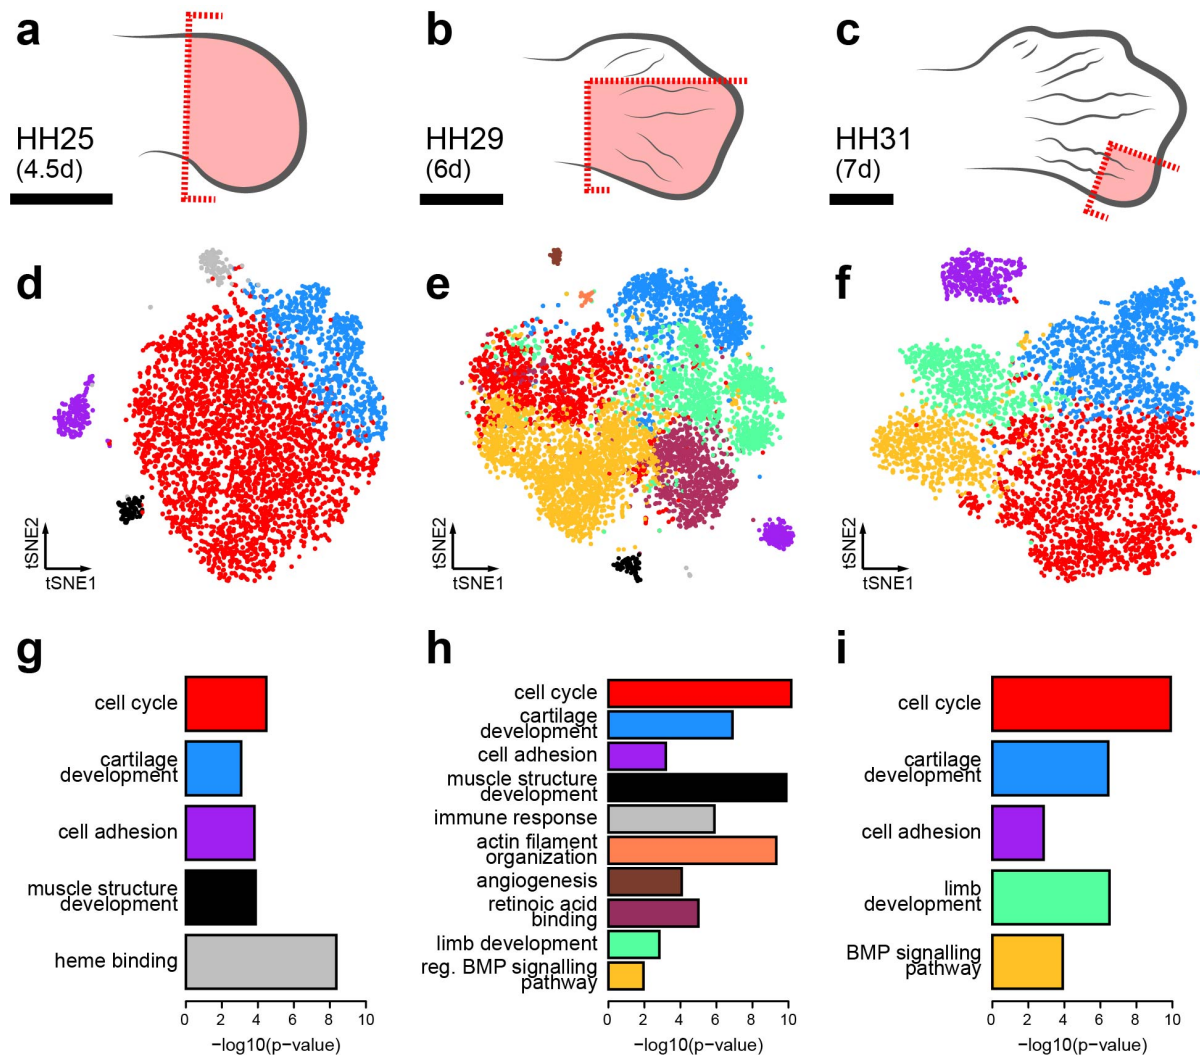

740

741 **Fig. 1**

742 **Sampling strategy and tissue composition of the developing chicken autopod. (a-c)**

743 Dissection schemes, highlighted in red, for sampling the different stages of hindlimb

744 development (scale bar ~1mm). **(d-f)** tSNE representation of the three datasets, representing

745 5,982 (HH25), 6,823 (HH29) and 4,823 (HH31) according to their transcriptome similarities.

746 Cellular color codes reflect unsupervised graph-based clustering results. Comparable cell

747 populations identified in multiple samples are visualized using the same color. **(g-i)** Select

748 overrepresented GO-terms, from analysis of the overexpressed genes, for each cluster at

749 stages **(g)** HH25, **(h)** HH29 and **(i)** HH31.

Feregino et al.

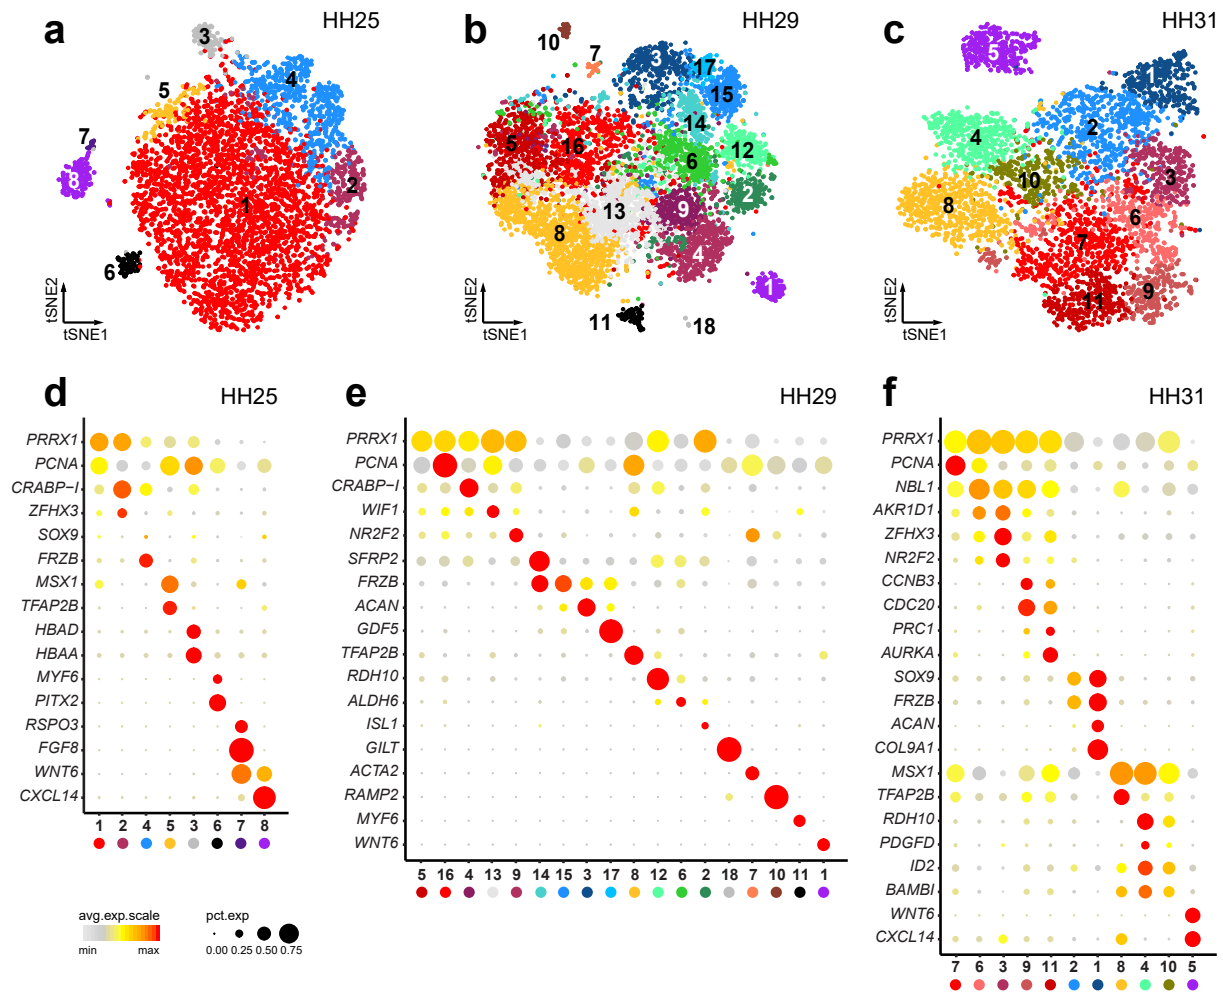

750  
751

**Fig. 2**

752 **Cell population sub-structure and marker gene expression (a-c)** tSNE plots of the three  
753 datasets. Colors now represent fine-tuned unsupervised graph-based clustering, with similar  
754 colorations relating to the results of the first clustering step. Comparable cell populations  
755 identified in multiple samples are visualized using the same color. For reference, sub-cluster  
756 numbers are added. **(d-f)** Dot plots of sub-cluster marker gene expression. Averaged  
757 expression level (heatmaps) and percentage of cells showing >0 expression (dot size) is  
758 visualized across all samples, for all identified sub-clusters. Same color-coding for sub-  
759 clusters identification is used as in **(a-c)**.

Feregrino et al.

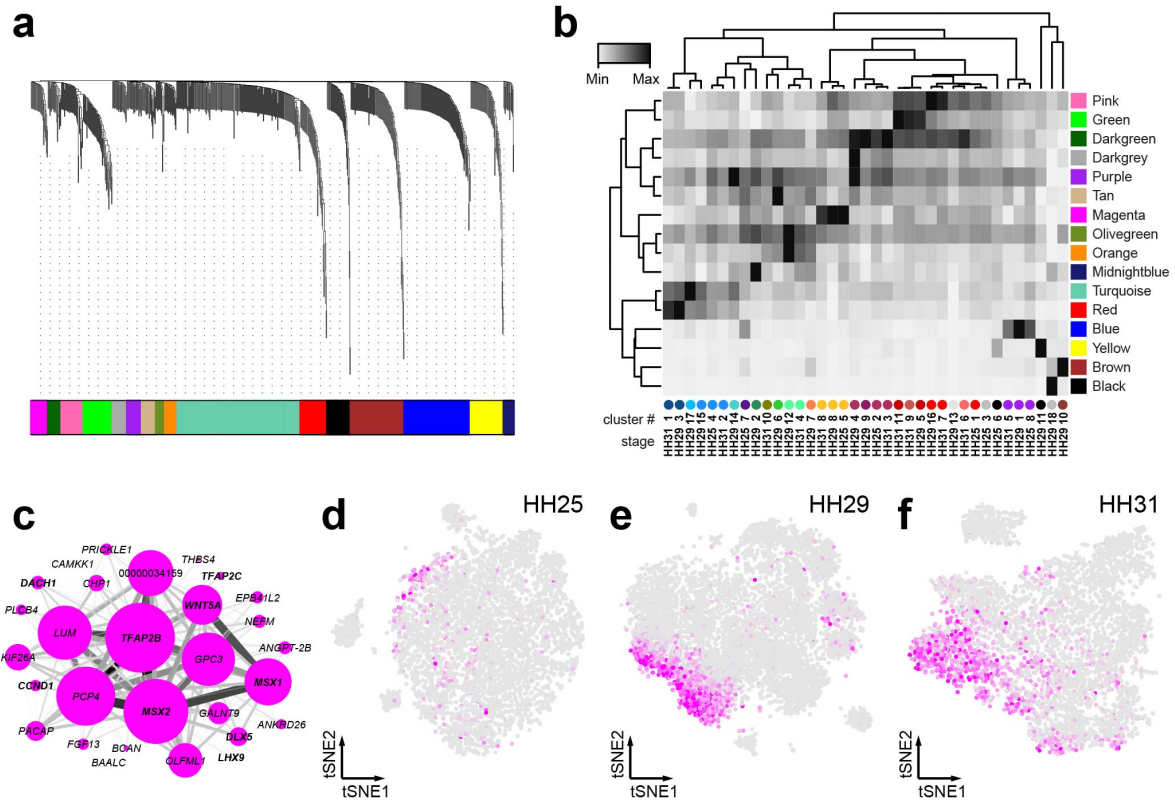

760

761 **Fig. 3**

762 **Weighted correlation network analysis and gene co-expression modules. (a)** WGCNA  
 763 gene hierarchical clustering dendrogram and modules of co-expression. A total of 16 distinct  
 764 co-expression modules are identified, visualized by colored bars at the bottom of the  
 765 dendrogram (color scheme unrelated to previous cell clustering). **(b)** Heatmap of mean  
 766 expression values per co-expression module, calculated across distinct cell sub-clusters and  
 767 developmental stages. Ordering based on hierarchical clustering of averaged co-expression  
 768 module activities and sub-clusters. Sub-clusters identification at bottom (number and color  
 769 code) corresponds to Fig. 2a-c. **(c)** *Cytoscape* visualization of co-expression module Magenta.  
 770 Node size is proportional to module membership of each gene, edge thickness represents  
 771 correlation of pair-wise gene co-expression. **(d-f)** Heatmap representing the averaged cellular  
 772 activity of the Magenta module, plotted on tSNE representations of the different samples.  
 773 Color intensity is proportional to the mean expression of the module in each cell.

Feregrino et al.

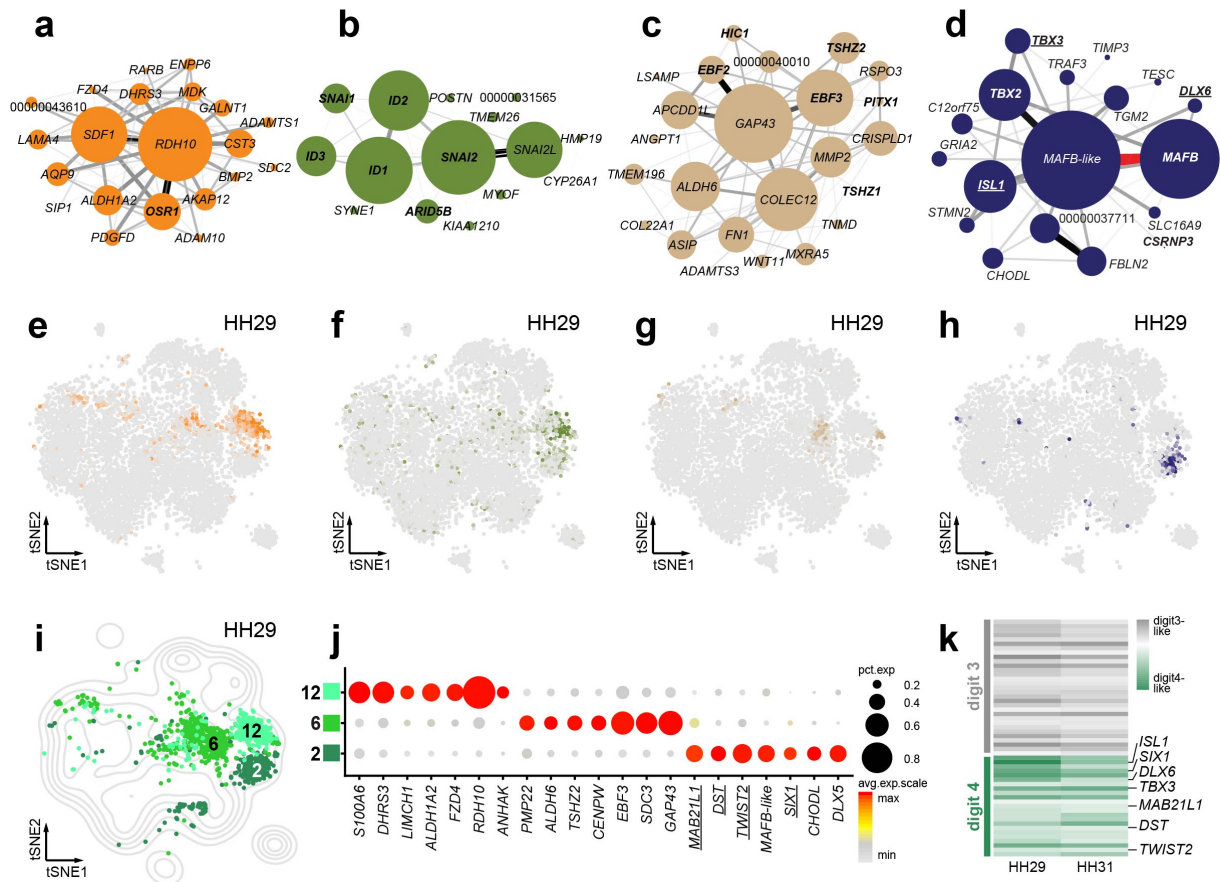

774

775 **Fig. 4**

776 **Molecular and spatial heterogeneity in the interdigit mesenchyme. (a-g)** Interdigit-  
 777 associated co-expression modules **(a)** Orange, **(b)** Olivegreen, **(c)** Tan, and **(d)** Midnightblue.  
 778 Node size represents gene module membership, edge thickness gene pair-wise correlation.  
 779 Gene names in bold are classified as transcription factors, uncharacterized genes show only  
 780 Ensembl numbers following the “ENSGALG” gene code. **(e-h)** Heatmaps of averaged  
 781 activity levels of the corresponding modules, visualized on top of a tSNE plot for sample  
 782 HH29. **(i)** Contour density plot of the tSNE projection for sample HH29, to delineate overall  
 783 cell distribution. Partial tSNE plot on top, to visualize only cells belonging to interdigit-like  
 784 sub-clusters (Color-coding and numbering according to Fig. 2b). **(j)** Expression dot plot of  
 785 differentially expressed genes between the three interdigit sub-clusters at stage HH29. **(k)**  
 786 Heatmap visualization of “digit3-like” and “digit4-like” gene sets at stages HH29 and HH31,  
 787 based on differential expression analysis of digit-specific bulk RNA-seq data by Wang et al.,  
 788 2011. Underlined gene names in **(d,j)** denote membership to the “digit IV-like” gene set.

Feregrino et al.

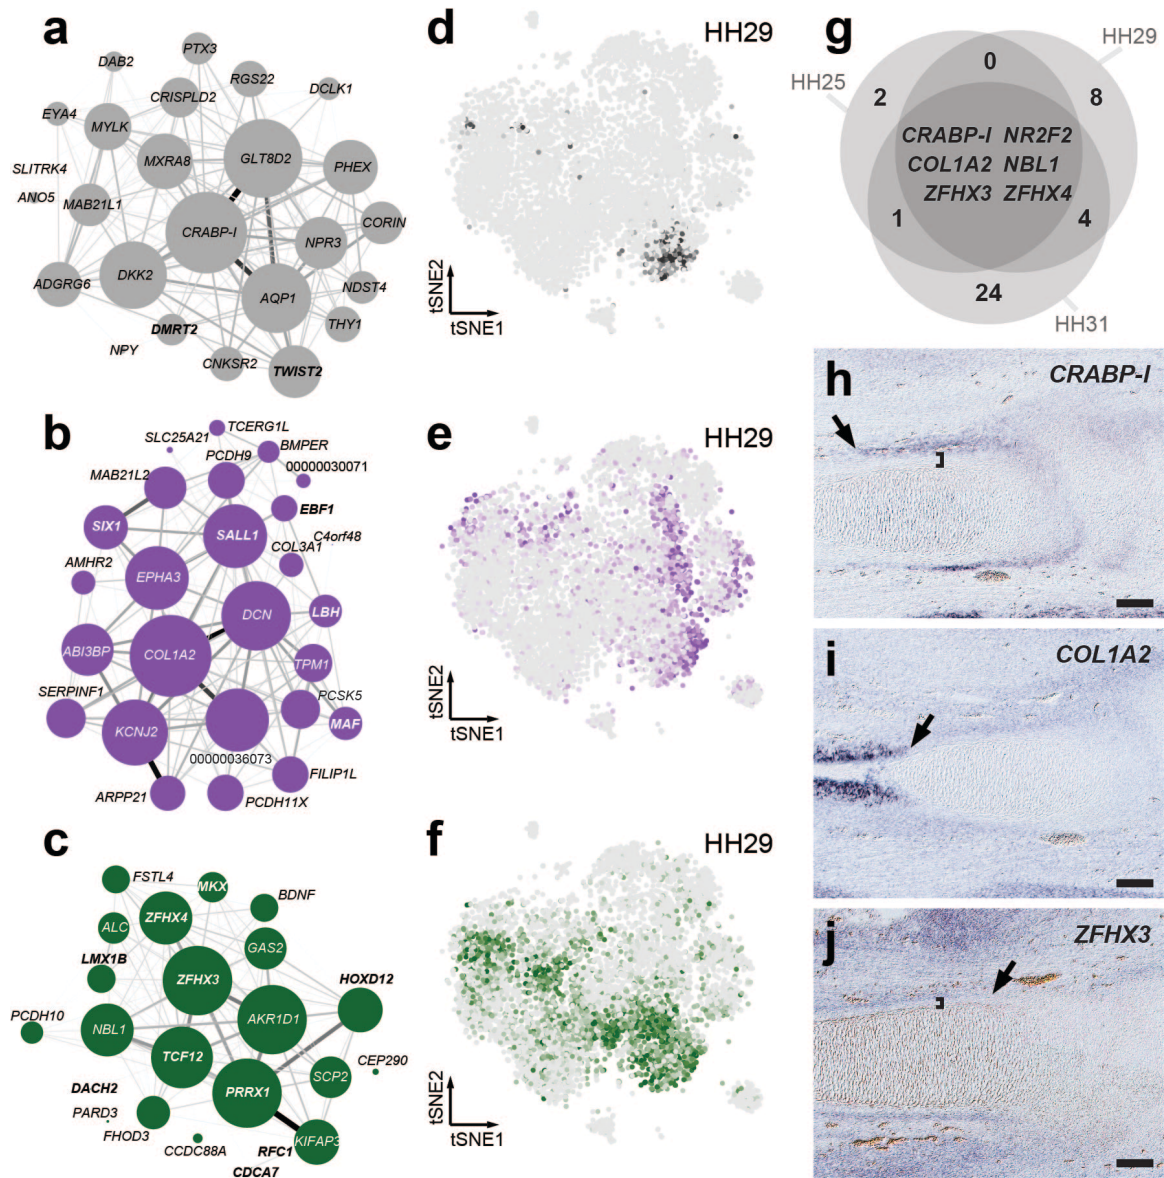

789

790 **Fig. 5**

791 **Transcriptional modules in the non-skeletal connective tissue (nsCT).** (a-c) Gene co-  
 792 expression modules (a) Darkgray, (b) Purple and (c) Darkgreen enriched for peri-skeletal  
 793 genes. Gene names in bold are classified as transcription factors, uncharacterized genes show  
 794 only Ensembl numbers following the “ENSGALG” gene code. (d-f) Corresponding averaged  
 795 module activities visualized as heatmaps on stage HH29 tSNE plots. (d) Venn diagram of  
 796 shared overexpressed genes in the nsCT populations of the three samples. (h-i) Section *in situ*  
 797 hybridization on stage HH31 chicken hindlimbs for three shared nsCT marker genes, *CRABP-*  
 798 *I*, *COL1A2* and *ZFHX3*. Arrows denote extent of expression along the long bone axis, while  
 799 brackets indicate separation from the forming skeletal element (scale bar=100mm).

Feregrino et al.

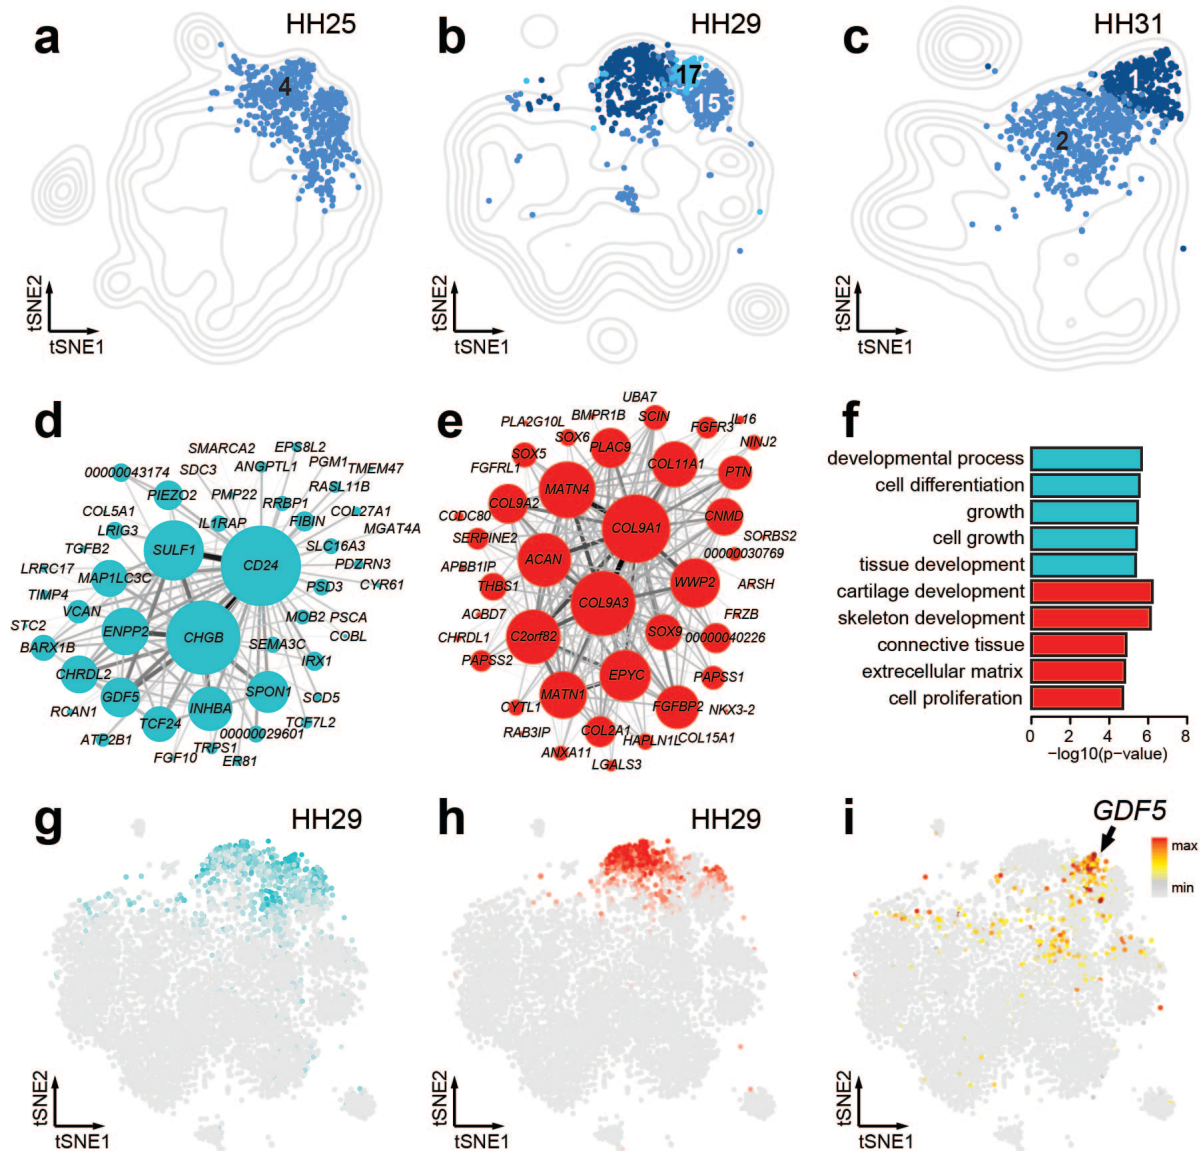

800

801 **Fig. 6**

802 **Transcriptional modules and sub-populations in skeletogenic cells (a-c)** Contour density  
 803 plot of tSNE projection for each sample. Partial tSNE plot on top, to visualize only cells  
 804 belonging to skeletogenic sub-clusters (Color-coding and numbering according to Fig. 2b).  
 805 Same color / shade across samples indicates comparable cell populations. **(d-e)** Gene co-  
 806 expression modules **(d)** Turquoise and **(e)** Red. Representation of the Turquoise module only  
 807 shows the 50 genes with the top membership, of a total of 215. **(f)** Top 5 GO-terms, from  
 808 analysis of the genes member of modules Turquoise and Red. **(g-h)** Averaged activities  
 809 visualized as heatmaps on stage HH29 tSNE plots corresponding to the modules  
 810 Turquoise and Red. **(i)** Expression heatmap of *GDF5* visualized on stage HH29 tSNE.

811 **Additional figures**

812

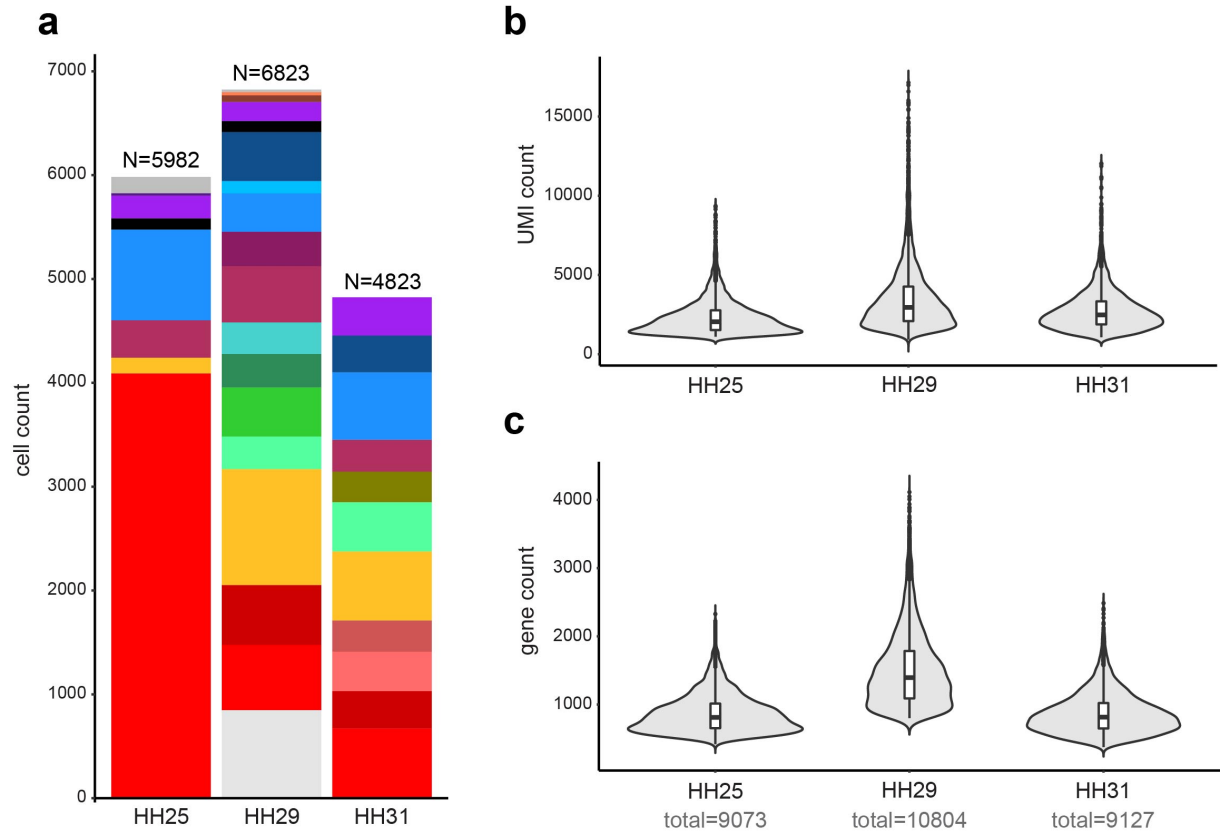

813

814 **Fig. S1 Sample compositions and data statistics. (a)** Cellular composition of the samples  
815 and datasets, color code corresponds to Fig. 2a-c. **(b)** UMI count distributions across the  
816 samples. **(c)** Gene count distributions across the samples.



Feregrino et al.

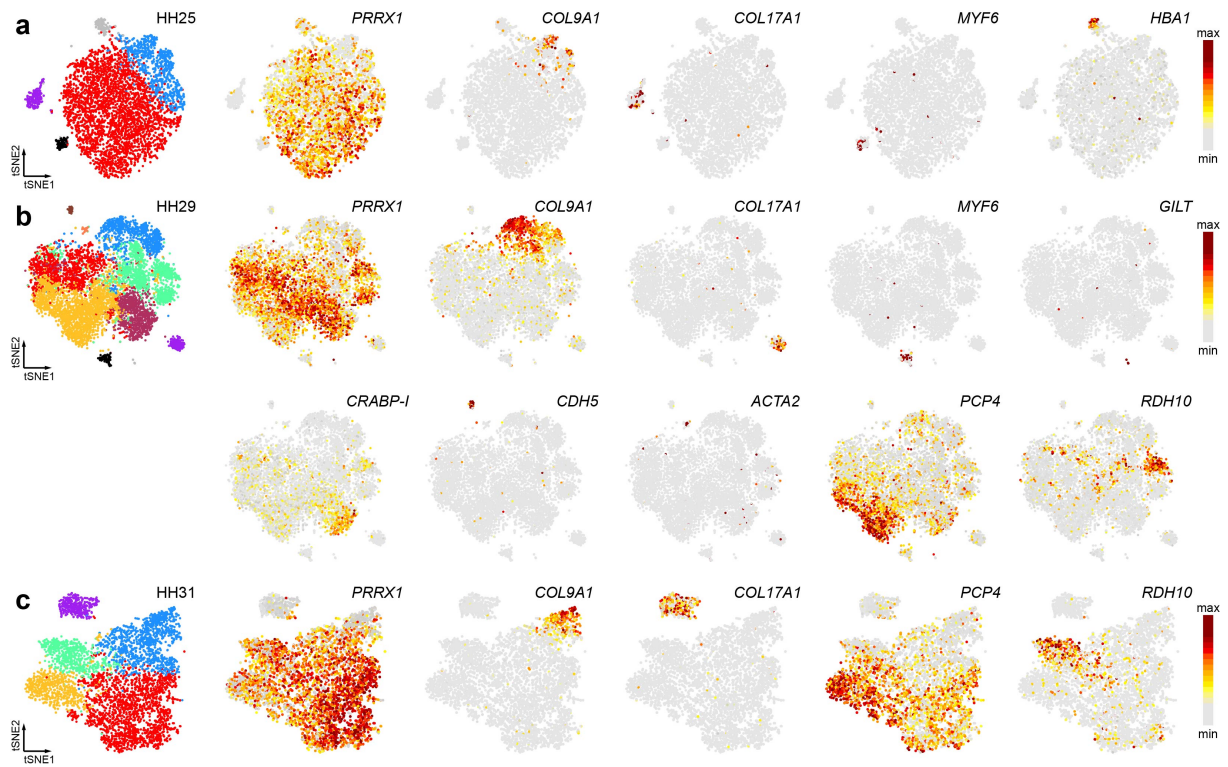

817

818 **Fig. S2 Expression patterns of marker genes.** Related to Fig. 1. Normalized expression  
819 patterns of selected genes to identify the different cell populations in our broad clustering,  
820 plotted on the tSNEs from sample (a) HH25, (b) HH29 and (c) HH31.

Feregrino et al.

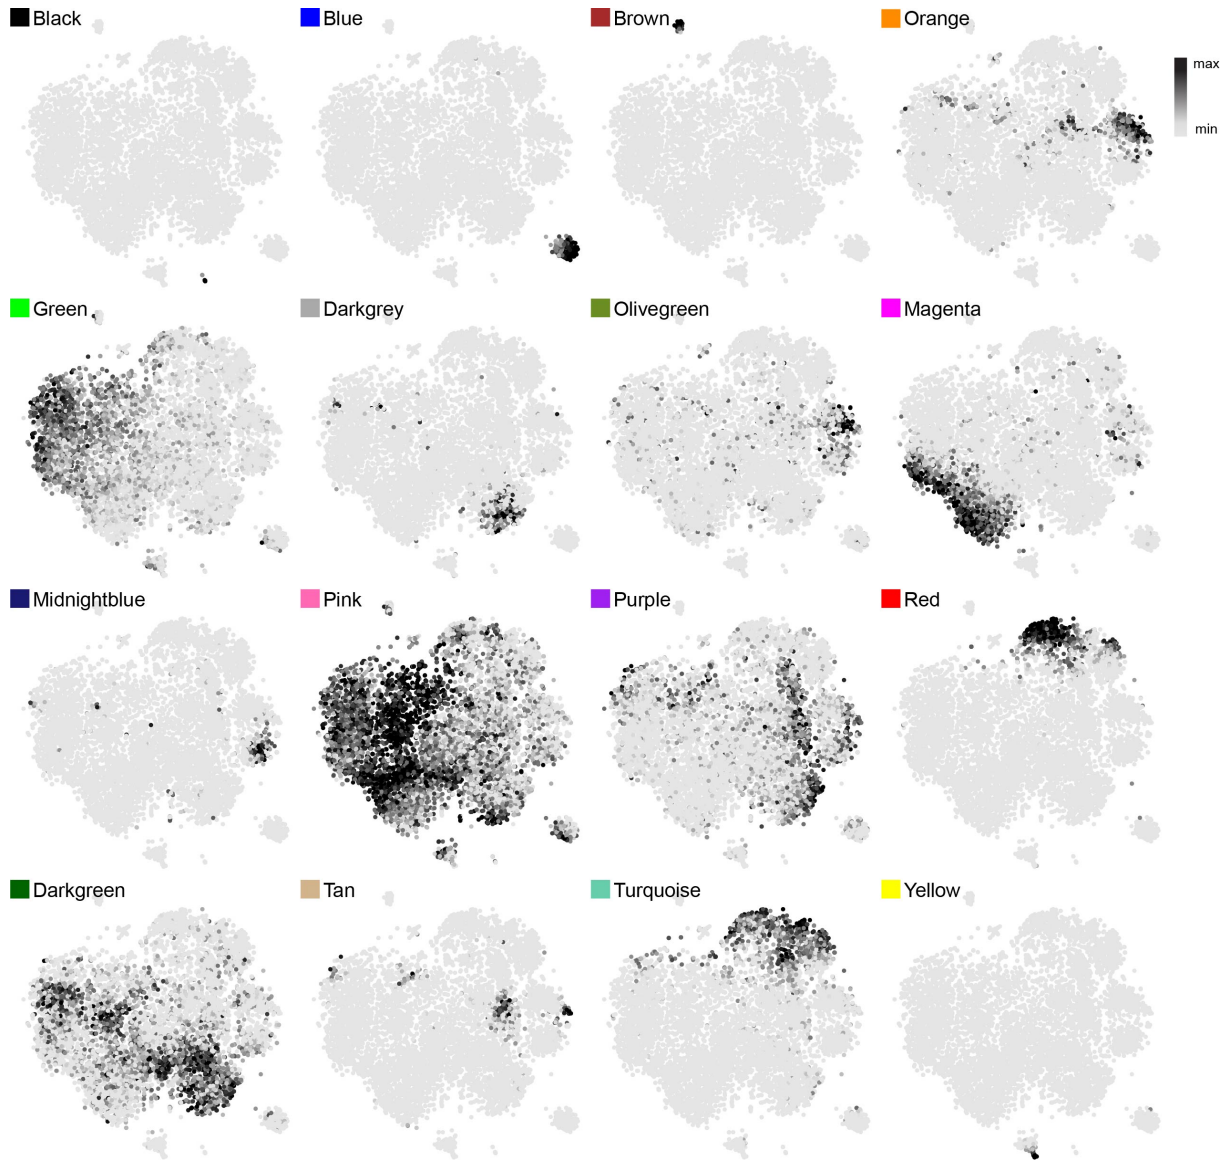

821

822 **Fig. S3 Co-expression modules expression patterns.** Related to Fig. 3. Average expression

823 of each WGCNA co-expression module on the tSNE of sample HH29.

Feregrino et al.

824 **Additional file 1**

825 **XLSX**

826 **Genes with enriched expression per cell population in sample HH25**

827 Genes enriched in the different cell clusters, calculated to be differentially expressed between  
828 each cell cluster and the rest of the cells in the sample. **p\_val**: originally calculated p value;  
829 **avg\_logFC**: average log fold-change relative to the rest of the cells; **pct.x**: percentage of cells  
830 in the focus cluster expressing the gene; **pct.rest**: percentage of cells in the rest of the clusters  
831 expressing the gene; **p\_val\_adj**: p value adjusted for multiple testing; **cluster**: cluster number  
832 in the main text and figures; **gene**: ENSEMBL gene identifier; **name**: gene symbol, or name  
833 when available; **enrichment**: ratio of pct.x : pct.rest.

834 **Additional file 3**

835 **XLSX**

836 **Genes with enriched expression per cell population in sample HH29**

837 Genes enriched in the different cell clusters, calculated to be differentially expressed between  
838 each cell cluster and the rest of the cells in the sample. **p\_val**: originally calculated p value;  
839 **avg\_logFC**: average log fold-change relative to the rest of the cells; **pct.x**: percentage of cells  
840 in the focus cluster expressing the gene; **pct.rest**: percentage of cells in the rest of the clusters  
841 expressing the gene; **p\_val\_adj**: p value adjusted for multiple testing; **cluster**: cluster number  
842 in the main text and figures; **gene**: ENSEMBL gene identifier; **name**: gene symbol, or name  
843 when available; **enrichment**: ratio of pct.x : pct.rest.

844 **Additional file 4**

845 **XLSX**

846 **Genes with enriched expression per cell population in sample HH31**

847 Genes enriched in the different cell clusters, calculated to be differentially expressed between  
848 each cell cluster and the rest of the cells in the sample. **p\_val**: originally calculated p value;  
849 **avg\_logFC**: average log fold-change relative to the rest of the cells; **pct.x**: percentage of cells  
850 in the focus cluster expressing the gene; **pct.rest**: percentage of cells in the rest of the clusters  
851 expressing the gene; **p\_val\_adj**: p value adjusted for multiple testing; **cluster**: cluster number  
852 in the main text and figures; **gene**: ENSEMBL gene identifier; **name**: gene symbol, or name  
853 when available; **enrichment**: ratio of pct.x : pct.rest.

854 **Additional file 5**

855 **XLSX**

856 **Co-expression modules and their genes**

Feregrino et al.

857 Genes part of the different co-expression modules. **nodeName**: ENSEMBL identifier of the  
858 genes part of the module; **altName**: gene symbol, or name when available; **membership**:  
859 membership to the module.
