# Supplementary material for: A Single-cell Transcriptomic Atlas of the Developing Chicken Limb
Source: bioRxiv preprint, doi:10.1101/598227, version 1 (2019-04-03)
Supplement: Additional file 2 [file 598227_file02.xlsx]

## Sheet: Mesenchyme - Red - 1
	p_val	avg_logFC	pct.1	pct.rest	p_val_adj	cluster	gene	name	enrichment
ENSGALG00000010255	1.33949e-127	0.577073	0.859	0.608	1.21532e-123	1	ENSGALG00000010255	NASP	1.41283
ENSGALG00000033212	5.18133e-98	0.532151	0.919	0.692	4.70102e-94	1	ENSGALG00000033212	HSP90AA1	1.32803
ENSGALG00000006512	4.61853e-95	0.506636	0.897	0.69	4.1904e-91	1	ENSGALG00000006512	HSPA8	1.3
ENSGALG00000003324	2.8116e-89	0.633672	0.698	0.383	2.55097e-85	1	ENSGALG00000003324	PRRX1	1.82245
ENSGALG00000028409	2.752e-75	0.334914	0.966	0.883	2.49689e-71	1	ENSGALG00000028409	SNRPG	1.094
ENSGALG00000008066	1.33476e-72	0.337825	0.946	0.851	1.21102e-68	1	ENSGALG00000008066	UQCR10	1.11163
ENSGALG00000009305	7.36567e-70	0.567676	0.708	0.44	6.68287e-66	1	ENSGALG00000009305	LBR	1.60909
ENSGALG00000037953	8.57375e-68	0.299797	0.996	0.941	7.77896e-64	1	ENSGALG00000037953	TUBA1A	1.05845
ENSGALG00000029292	1.27482e-57	0.429399	0.652	0.425	1.15664e-53	1	ENSGALG00000029292	PCNA	1.53412
ENSGALG00000037167	2.99486e-57	0.837433	0.496	0.322	2.71723e-53	1	ENSGALG00000037167	HIST1H103	1.54037
ENSGALG00000009070	7.57535e-57	0.30963	0.944	0.865	6.87312e-53	1	ENSGALG00000009070	HSPE1	1.09133
ENSGALG00000003922	1.31615e-56	0.550424	0.574	0.315	1.19415e-52	1	ENSGALG00000003922	TOP2A	1.82222
ENSGALG00000009286	4.87679e-50	0.263406	0.969	0.932	4.42471e-46	1	ENSGALG00000009286	ATP5G3	1.0397
ENSGALG00000006841	3.45279e-49	0.271221	0.852	0.756	3.13272e-45	1	ENSGALG00000006841	POLR2L	1.12698
ENSGALG00000029837	1.19207e-48	0.267906	0.913	0.828	1.08157e-44	1	ENSGALG00000029837	OST4	1.10266
ENSGALG00000008094	1.91939e-48	0.384557	0.718	0.524	1.74146e-44	1	ENSGALG00000008094	HSPD1	1.37023
ENSGALG00000009228	3.41828e-47	0.373038	0.7	0.525	3.1014e-43	1	ENSGALG00000009228	PARP1	1.33333
ENSGALG00000032930	1.22463e-46	0.269061	0.908	0.847	1.1111e-42	1	ENSGALG00000032930	NCL	1.07202
ENSGALG00000021047	3.08962e-45	0.478858	0.384	0.203	2.80322e-41	1	ENSGALG00000021047	KIFAP3	1.89163
ENSGALG00000006326	7.2782e-44	0.252443	0.961	0.901	6.60351e-40	1	ENSGALG00000006326	MIF	1.06659
ENSGALG00000015691	1.29782e-43	0.450508	0.647	0.379	1.17751e-39	1	ENSGALG00000015691	SMC2	1.70712
ENSGALG00000007936	4.29112e-43	0.36588	0.587	0.415	3.89333e-39	1	ENSGALG00000007936	PGK1	1.41446
ENSGALG00000016442	8.21907e-42	0.444871	0.303	0.14	7.45716e-38	1	ENSGALG00000016442	RRM2	2.16429
ENSGALG00000015013	4.70945e-40	0.581421	0.281	0.103	4.27288e-36	1	ENSGALG00000015013	MSX1	2.72816
ENSGALG00000011747	1.67035e-39	0.531868	0.353	0.198	1.5155e-35	1	ENSGALG00000011747	HISTH1	1.78283
ENSGALG00000011931	2.90425e-38	0.31105	0.733	0.592	2.63502e-34	1	ENSGALG00000011931	SNU13	1.23818
ENSGALG00000032039	4.38821e-38	0.508819	0.326	0.15	3.98142e-34	1	ENSGALG00000032039	HOXD13	2.17333
ENSGALG00000009309	1.63733e-37	0.258327	0.729	0.609	1.48555e-33	1	ENSGALG00000009309	EIF5A2	1.19704
ENSGALG00000008812	2.7426e-37	0.34024	0.657	0.487	2.48836e-33	1	ENSGALG00000008812	CCT4	1.34908
ENSGALG00000009733	3.0144e-37	0.234523	0.904	0.821	2.73496e-33	1	ENSGALG00000009733	SEM1	1.1011
ENSGALG00000032207	1.73563e-36	0.27129	0.785	0.652	1.57473e-32	1	ENSGALG00000032207	HMGN2	1.20399
ENSGALG00000037483	2.45322e-36	0.246451	0.89	0.796	2.2258e-32	1	ENSGALG00000037483	ANP32B	1.11809
ENSGALG00000013041	9.40256e-36	0.348579	0.574	0.416	8.53094e-32	1	ENSGALG00000013041	CCT5	1.37981
ENSGALG00000034630	1.89032e-35	0.297426	0.652	0.504	1.71509e-31	1	ENSGALG00000034630	PPIL1	1.29365
ENSGALG00000006367	2.24978e-35	0.338762	0.432	0.277	2.04122e-31	1	ENSGALG00000006367	PCBD2	1.55957
ENSGALG00000033196	7.55854e-34	0.338089	0.552	0.405	6.85786e-30	1	ENSGALG00000033196	EIF2B	1.36296
ENSGALG00000002701	1.30064e-33	0.357592	0.399	0.251	1.18007e-29	1	ENSGALG00000002701	DNAJC9	1.58964
ENSGALG00000025996	3.72449e-33	0.467265	0.26	0.107	3.37923e-29	1	ENSGALG00000025996	MKI67	2.42991
ENSGALG00000034271	1.15482e-32	0.392946	0.287	0.132	1.04777e-28	1	ENSGALG00000034271	UHRF1	2.17424
ENSGALG00000027416	2.20065e-32	0.202925	0.91	0.829	1.99665e-28	1	ENSGALG00000027416	ROMO1	1.09771
ENSGALG00000001654	2.82428e-32	0.304759	0.617	0.473	2.56247e-28	1	ENSGALG00000001654	C1QBP	1.30444
ENSGALG00000014873	3.12706e-32	0.395002	0.473	0.289	2.83718e-28	1	ENSGALG00000014873	GJA1	1.63668
ENSGALG00000004845	3.31343e-32	0.280763	0.659	0.515	3.00627e-28	1	ENSGALG00000004845	TIMM10	1.27961
ENSGALG00000021692	4.67889e-32	0.198275	0.925	0.862	4.24516e-28	1	ENSGALG00000021692	NDUFA11	1.07309
ENSGALG00000042875	1.506e-31	0.210814	0.976	0.91	1.36639e-27	1	ENSGALG00000042875	HMGB1	1.07253
ENSGALG00000007237	2.39599e-31	0.307066	0.615	0.456	2.17388e-27	1	ENSGALG00000007237	ALYREF	1.34868
ENSGALG00000014023	4.02738e-31	0.265233	0.874	0.757	3.65405e-27	1	ENSGALG00000014023	H2AFZ	1.15456
ENSGALG00000002781	6.42248e-31	0.377779	0.186	0.069	5.82712e-27	1	ENSGALG00000002781	BRCA1	2.69565
ENSGALG00000027234	1.99577e-30	0.381418	0.373	0.204	1.81077e-26	1	ENSGALG00000027234	HOXA13	1.82843
ENSGALG00000031238	4.10425e-30	0.267142	0.762	0.641	3.72379e-26	1	ENSGALG00000031238	SLIRP	1.18877
ENSGALG00000012684	7.34994e-30	0.336082	0.426	0.277	6.6686e-26	1	ENSGALG00000012684	DEK	1.53791
ENSGALG00000009690	1.14301e-29	0.540666	0.388	0.198	1.03706e-25	1	ENSGALG00000009690	CENPF	1.9596
ENSGALG00000035096	1.18358e-29	0.294468	0.638	0.497	1.07387e-25	1	ENSGALG00000035096	SON	1.2837
ENSGALG00000010900	1.5254e-29	0.420789	0.314	0.164	1.384e-25	1	ENSGALG00000010900	SPC25	1.91463
ENSGALG00000012466	6.90899e-29	0.271402	0.7	0.587	6.26853e-25	1	ENSGALG00000012466	FKBP3	1.1925
ENSGALG00000000708	1.44868e-28	0.295194	0.664	0.497	1.31439e-24	1	ENSGALG00000000708	NUCKS1	1.33602
ENSGALG00000034645	2.11897e-28	0.248385	0.757	0.636	1.92254e-24	1	ENSGALG00000034645	USMG5	1.19025
ENSGALG00000027700	4.29779e-28	0.380464	0.439	0.268	3.89938e-24	1	ENSGALG00000027700	FLAD1	1.63806
ENSGALG00000006974	5.12003e-28	0.357104	0.338	0.204	4.6454e-24	1	ENSGALG00000006974	DDX27	1.65686
ENSGALG00000032398	7.02134e-28	0.455846	0.418	0.228	6.37046e-24	1	ENSGALG00000032398	ASPM	1.83333
ENSGALG00000010745	8.57356e-28	0.267651	0.821	0.637	7.77879e-24	1	ENSGALG00000010745	HMGB2	1.28885
ENSGALG00000017357	8.77838e-28	0.269038	0.551	0.408	7.96463e-24	1	ENSGALG00000017357	UP_SRSF2	1.35049
ENSGALG00000016984	1.23615e-27	0.287792	0.592	0.463	1.12156e-23	1	ENSGALG00000016984	ZC3H13	1.27862
ENSGALG00000002107	2.72179e-27	0.336783	0.355	0.224	2.46948e-23	1	ENSGALG00000002107	RANBP1	1.58482
ENSGALG00000032679	2.93241e-27	0.286253	0.578	0.452	2.66057e-23	1	ENSGALG00000032679	GCSH	1.27876
ENSGALG00000004701	6.7376e-27	0.19781	0.82	0.74	6.11302e-23	1	ENSGALG00000004701	SET	1.10811
ENSGALG00000039209	4.33529e-26	0.325453	0.164	0.062	3.93341e-22	1	ENSGALG00000039209	WIF1	2.64516
ENSGALG00000012348	5.14602e-26	0.296027	0.307	0.185	4.66899e-22	1	ENSGALG00000012348	MCM6	1.65946
ENSGALG00000033666	5.63886e-26	0.27719	0.637	0.505	5.11614e-22	1	ENSGALG00000033666	NHP2	1.26139
ENSGALG00000039779	9.88826e-26	0.241774	0.773	0.676	8.97162e-22	1	ENSGALG00000039779	SDOS	1.14349
ENSGALG00000015821	1.26375e-25	0.292523	0.475	0.347	1.1466e-21	1	ENSGALG00000015821	CCT8	1.36888
ENSGALG00000029408	1.42011e-25	0.310581	0.33	0.199	1.28846e-21	1	ENSGALG00000029408	BAZ1B	1.65829
ENSGALG00000005490	2.72972e-25	0.114891	0.994	0.974	2.47668e-21	1	ENSGALG00000005490	RPS2	1.02053
ENSGALG00000004245	2.73637e-25	0.295894	0.391	0.259	2.48271e-21	1	ENSGALG00000004245	NUDT1	1.50965
ENSGALG00000009839	3.22089e-25	0.288938	0.573	0.445	2.92231e-21	1	ENSGALG00000009839	PPIG	1.28764
ENSGALG00000016088	3.82966e-25	0.281856	0.573	0.453	3.47465e-21	1	ENSGALG00000016088	CCT7	1.2649
ENSGALG00000002321	3.92635e-25	0.320585	0.457	0.314	3.56238e-21	1	ENSGALG00000002321	GOT2	1.45541
ENSGALG00000011229	3.95229e-25	0.185424	0.861	0.795	3.58591e-21	1	ENSGALG00000011229	SERBP1	1.08302
ENSGALG00000012112	4.27674e-25	0.212951	0.802	0.693	3.88029e-21	1	ENSGALG00000012112	DBI	1.15729
ENSGALG00000014381	7.32667e-25	0.267891	0.469	0.353	6.64749e-21	1	ENSGALG00000014381	HNRNPAB	1.32861
ENSGALG00000004195	1.78198e-24	0.411426	0.413	0.24	1.61679e-20	1	ENSGALG00000004195	KIF4A	1.72083
ENSGALG00000038032	2.86648e-24	0.263934	0.443	0.309	2.60075e-20	1	ENSGALG00000038032	DUT	1.43366
ENSGALG00000010700	2.97614e-24	0.309971	0.345	0.218	2.70025e-20	1	ENSGALG00000010700	RPA3	1.58257
ENSGALG00000034168	4.08315e-24	0.254899	0.682	0.545	3.70464e-20	1	ENSGALG00000034168	WNT5A	1.25138
ENSGALG00000031031	5.13393e-24	0.333326	0.32	0.197	4.65802e-20	1	ENSGALG00000031031	C11orf31	1.62437
ENSGALG00000003522	3.39899e-23	0.259507	0.59	0.455	3.0839e-19	1	ENSGALG00000003522	RBBP4	1.2967
ENSGALG00000014298	3.51404e-23	0.324301	0.236	0.127	3.18829e-19	1	ENSGALG00000014298	RFC1	1.85827
ENSGALG00000010238	3.52705e-23	0.179532	0.828	0.767	3.20009e-19	1	ENSGALG00000010238	NAP1L1	1.07953
ENSGALG00000033569	5.4152e-23	0.210765	0.668	0.564	4.91321e-19	1	ENSGALG00000033569		1.1844
ENSGALG00000009677	7.55453e-23	0.285593	0.41	0.283	6.85423e-19	1	ENSGALG00000009677	UBP	1.44876
ENSGALG00000006037	9.95862e-23	0.297887	0.271	0.163	9.03545e-19	1	ENSGALG00000006037	MCM2	1.66258
ENSGALG00000009274	1.03402e-22	0.38294	0.296	0.153	9.38163e-19	1	ENSGALG00000009274	HOXD12	1.93464
ENSGALG00000034218	2.04128e-22	0.319846	0.301	0.183	1.85205e-18	1	ENSGALG00000034218	UP_PA2G4	1.64481
ENSGALG00000011967	3.73972e-22	0.297478	0.395	0.247	3.39305e-18	1	ENSGALG00000011967	MAD2L1	1.59919
ENSGALG00000031139	4.2593e-22	0.271196	0.518	0.382	3.86447e-18	1	ENSGALG00000031139	LSM3	1.35602
ENSGALG00000004963	5.35175e-22	0.28464	0.408	0.284	4.85564e-18	1	ENSGALG00000004963	TIMM8A	1.43662
ENSGALG00000040586	6.86129e-22	0.340895	0.366	0.227	6.22525e-18	1	ENSGALG00000040586	TUBA3E	1.61233
ENSGALG00000011036	1.22406e-21	0.184598	0.809	0.719	1.11059e-17	1	ENSGALG00000011036	HNRNPA2B1	1.12517
ENSGALG00000002990	1.24915e-21	0.198214	0.801	0.721	1.13336e-17	1	ENSGALG00000002990	PRELID1	1.11096
ENSGALG00000000632	1.8356e-21	0.320763	0.194	0.091	1.66544e-17	1	ENSGALG00000000632	CHTF8	2.13187
ENSGALG00000006267	1.98491e-21	0.364853	0.313	0.178	1.8009e-17	1	ENSGALG00000006267	TPX2	1.75843
ENSGALG00000010702	2.40324e-21	0.303121	0.35	0.23	2.18046e-17	1	ENSGALG00000010702	ADSS	1.52174
ENSGALG00000006899	2.41936e-21	0.118443	0.974	0.952	2.19509e-17	1	ENSGALG00000006899	ATP5L	1.02311
ENSGALG00000038667	3.13913e-21	0.202772	0.699	0.574	2.84813e-17	1	ENSGALG00000038667	MRPS12	1.21777
ENSGALG00000006404	3.28817e-21	0.250829	0.597	0.468	2.98335e-17	1	ENSGALG00000006404	DDX46	1.27564
ENSGALG00000014953	4.10591e-21	0.265858	0.504	0.374	3.7253e-17	1	ENSGALG00000014953	RWDD1	1.34759
ENSGALG00000015105	5.10853e-21	0.271819	0.248	0.148	4.63497e-17	1	ENSGALG00000015105	PSIP1	1.67568
ENSGALG00000008703	5.44061e-21	0.245778	0.305	0.196	4.93627e-17	1	ENSGALG00000008703	RFC4	1.55612
ENSGALG00000043744	6.30173e-21	0.25019	0.452	0.341	5.71756e-17	1	ENSGALG00000043744	NDFIP1	1.32551
ENSGALG00000000894	7.34885e-21	0.358487	0.24	0.122	6.66761e-17	1	ENSGALG00000000894	APCDD1	1.96721
ENSGALG00000032783	7.74184e-21	0.243235	0.527	0.411	7.02417e-17	1	ENSGALG00000032783	SUMO3	1.28224
ENSGALG00000030411	1.06262e-20	0.212638	0.687	0.573	9.64111e-17	1	ENSGALG00000030411	PSMA7	1.19895
ENSGALG00000010884	1.22363e-20	0.272743	0.245	0.144	1.1102e-16	1	ENSGALG00000010884	DDX24	1.70139
ENSGALG00000005309	1.44497e-20	0.256442	0.435	0.314	1.31102e-16	1	ENSGALG00000005309	TKT	1.38535
ENSGALG00000009975	1.62468e-20	0.237816	0.555	0.43	1.47407e-16	1	ENSGALG00000009975	CCT2	1.2907
ENSGALG00000026847	1.96969e-20	0.211356	0.618	0.506	1.7871e-16	1	ENSGALG00000026847	C19orf70	1.22134
ENSGALG00000007537	2.99679e-20	0.384262	0.281	0.143	2.71899e-16	1	ENSGALG00000007537	INCENP	1.96503
ENSGALG00000017380	3.79848e-20	0.127941	0.942	0.904	3.44636e-16	1	ENSGALG00000017380	UQCRH	1.04204
ENSGALG00000027151	4.097e-20	0.129113	0.923	0.885	3.71721e-16	1	ENSGALG00000027151	FKBP12	1.04294
ENSGALG00000017207	4.55025e-20	0.240959	0.525	0.397	4.12844e-16	1	ENSGALG00000017207	CWC15	1.32242
ENSGALG00000041334	7.39066e-20	0.243474	0.483	0.364	6.70554e-16	1	ENSGALG00000041334	SNRPD1	1.32692
ENSGALG00000037807	8.84473e-20	0.278095	0.29	0.179	8.02483e-16	1	ENSGALG00000037807	NOP2	1.62011
ENSGALG00000011464	1.09288e-19	0.242391	0.63	0.5	9.91572e-16	1	ENSGALG00000011464	EIF5	1.26
ENSGALG00000000790	1.56473e-19	0.230157	0.471	0.362	1.41968e-15	1	ENSGALG00000000790	DNAJC8	1.3011
ENSGALG00000010957	2.67109e-19	0.280678	0.251	0.143	2.42348e-15	1	ENSGALG00000010957	USP1	1.75524
ENSGALG00000005105	3.11283e-19	0.237153	0.458	0.347	2.82427e-15	1	ENSGALG00000005105	TPR	1.31988
ENSGALG00000001613	3.46564e-19	0.295968	0.342	0.22	3.14437e-15	1	ENSGALG00000001613	GNL3	1.55455
ENSGALG00000012135	3.56167e-19	0.240943	0.547	0.444	3.23151e-15	1	ENSGALG00000012135	ATF4	1.23198
ENSGALG00000022950	5.40183e-19	0.239496	0.572	0.457	4.90108e-15	1	ENSGALG00000022950	MRPL35	1.25164
ENSGALG00000019358	6.81984e-19	0.242497	0.467	0.362	6.18764e-15	1	ENSGALG00000019358	LLPH	1.29006
ENSGALG00000032489	6.82613e-19	0.234078	0.555	0.442	6.19335e-15	1	ENSGALG00000032489	ELOF1	1.25566
ENSGALG00000012546	7.03409e-19	0.225406	0.245	0.154	6.38203e-15	1	ENSGALG00000012546	MCM5	1.59091
ENSGALG00000002569	7.25448e-19	0.186888	0.768	0.658	6.58199e-15	1	ENSGALG00000002569	RAN	1.16717
ENSGALG00000007124	8.14469e-19	0.257895	0.429	0.314	7.38968e-15	1	ENSGALG00000007124	POP5	1.36624
ENSGALG00000032847	1.23689e-18	0.177008	0.778	0.684	1.12223e-14	1	ENSGALG00000032847	HDGF	1.13743
ENSGALG00000009913	1.26839e-18	0.25048	0.284	0.185	1.15081e-14	1	ENSGALG00000009913	SMARCA5	1.53514
ENSGALG00000002363	1.61933e-18	0.246291	0.452	0.333	1.46922e-14	1	ENSGALG00000002363	HSPA9	1.35736
ENSGALG00000002448	2.35065e-18	0.239006	0.549	0.429	2.13275e-14	1	ENSGALG00000002448	CCT6	1.27972
ENSGALG00000005451	2.70818e-18	0.29241	0.22	0.12	2.45713e-14	1	ENSGALG00000005451	HELLS	1.83333
ENSGALG00000005525	2.91203e-18	0.184085	0.685	0.596	2.64208e-14	1	ENSGALG00000005525	SRSF1	1.14933
ENSGALG00000014331	4.31671e-18	0.247269	0.407	0.292	3.91655e-14	1	ENSGALG00000014331	FKBP4	1.39384
ENSGALG00000010175	4.37544e-18	0.14765	0.814	0.738	3.96984e-14	1	ENSGALG00000010175	HSP90AB1	1.10298
ENSGALG00000008873	4.5378e-18	0.280238	0.33	0.236	4.11715e-14	1	ENSGALG00000008873	POLE3	1.39831
ENSGALG00000032730	4.85723e-18	0.252409	0.439	0.319	4.40696e-14	1	ENSGALG00000032730	NOP56	1.37618
ENSGALG00000026380	6.8134e-18	0.36524	0.377	0.216	6.1818e-14	1	ENSGALG00000026380	UBE2C	1.74537
ENSGALG00000013626	7.05488e-18	0.239435	0.191	0.105	6.40089e-14	1	ENSGALG00000013626	GMNN	1.81905
ENSGALG00000001126	8.79279e-18	0.25223	0.204	0.115	7.9777e-14	1	ENSGALG00000001126	CHAF1A	1.77391
ENSGALG00000035223	9.16451e-18	0.179049	0.752	0.654	8.31496e-14	1	ENSGALG00000035223	NDUFA6	1.14985
ENSGALG00000040335	1.11821e-17	0.262727	0.267	0.172	1.01455e-13	1	ENSGALG00000040335	CEBPZ	1.55233
ENSGALG00000015091	1.18034e-17	0.247412	0.173	0.089	1.07092e-13	1	ENSGALG00000015091	HAUS6	1.94382
ENSGALG00000039967	1.33678e-17	0.190959	0.611	0.518	1.21286e-13	1	ENSGALG00000039967	RP11-529K1.3	1.17954
ENSGALG00000002144	1.41858e-17	0.2558	0.397	0.272	1.28708e-13	1	ENSGALG00000002144	THRAP3	1.45956
ENSGALG00000038041	1.64729e-17	0.216924	0.491	0.379	1.49458e-13	1	ENSGALG00000038041	PHF14	1.29551
ENSGALG00000004848	1.67133e-17	0.0942838	0.987	0.977	1.5164e-13	1	ENSGALG00000004848	YBX1	1.01024
ENSGALG00000030313	1.69804e-17	0.271871	0.159	0.076	1.54063e-13	1	ENSGALG00000030313	RAD51A	2.09211
ENSGALG00000008821	1.81147e-17	0.208063	0.58	0.487	1.64355e-13	1	ENSGALG00000008821	NDUFA5	1.19097
ENSGALG00000008584	1.93589e-17	0.379059	0.216	0.109	1.75643e-13	1	ENSGALG00000008584	NUSAP1	1.98165
ENSGALG00000041857	2.41741e-17	0.253119	0.326	0.217	2.19332e-13	1	ENSGALG00000041857	ZC3H15	1.5023
ENSGALG00000034288	2.47345e-17	0.252422	0.425	0.315	2.24416e-13	1	ENSGALG00000034288	KIAA0101	1.34921
ENSGALG00000001096	4.47578e-17	0.175844	0.762	0.665	4.06088e-13	1	ENSGALG00000001096	UQCR11	1.14586
ENSGALG00000002514	6.27893e-17	0.211759	0.625	0.501	5.69687e-13	1	ENSGALG00000002514	SFPQ	1.2475
ENSGALG00000012425	7.97744e-17	0.248731	0.249	0.154	7.23793e-13	1	ENSGALG00000012425	FERMT2	1.61688
ENSGALG00000020999	8.29621e-17	0.234245	0.359	0.255	7.52715e-13	1	ENSGALG00000020999	DYNLL1	1.40784
ENSGALG00000014791	9.08333e-17	0.215233	0.249	0.152	8.24131e-13	1	ENSGALG00000014791	WDR3	1.63816
ENSGALG00000006777	9.58567e-17	0.243216	0.356	0.261	8.69708e-13	1	ENSGALG00000006777	MRPS11	1.36398
ENSGALG00000005674	1.49656e-16	0.256751	0.398	0.282	1.35783e-12	1	ENSGALG00000005674	USP10	1.41135
ENSGALG00000014555	1.70007e-16	0.137725	0.822	0.77	1.54247e-12	1	ENSGALG00000014555	C12orf57	1.06753
ENSGALG00000008517	1.79358e-16	0.206534	0.463	0.363	1.62732e-12	1	ENSGALG00000008517	MCTS1	1.27548
ENSGALG00000026077	2.83342e-16	0.205742	0.609	0.493	2.57076e-12	1	ENSGALG00000026077	ALDOC	1.23529
ENSGALG00000015830	3.63042e-16	0.239283	0.359	0.253	3.29388e-12	1	ENSGALG00000015830	SYNCRIP	1.41897
ENSGALG00000028900	3.90639e-16	0.260131	0.158	0.078	3.54427e-12	1	ENSGALG00000028900	CENPT	2.02564
ENSGALG00000015000	5.04998e-16	0.268239	0.313	0.194	4.58184e-12	1	ENSGALG00000015000	LYAR	1.6134
ENSGALG00000010167	6.06476e-16	0.22833	0.414	0.315	5.50256e-12	1	ENSGALG00000010167	PNN	1.31429
ENSGALG00000039964	6.64704e-16	0.294302	0.29	0.184	6.03086e-12	1	ENSGALG00000039964	KIFC1	1.57609
ENSGALG00000040109	9.33919e-16	0.245855	0.471	0.354	8.47345e-12	1	ENSGALG00000040109	LARP1	1.33051
ENSGALG00000007606	1.01172e-15	0.249578	0.425	0.312	9.17931e-12	1	ENSGALG00000007606	PGAM1	1.36218
ENSGALG00000024481	1.01675e-15	0.224882	0.345	0.24	9.22496e-12	1	ENSGALG00000024481	CENPS	1.4375
ENSGALG00000006334	1.1128e-15	0.221611	0.214	0.131	1.00964e-11	1	ENSGALG00000006334	LAP3	1.63359
ENSGALG00000004503	1.16745e-15	0.223929	0.154	0.084	1.05923e-11	1	ENSGALG00000004503	CENPV	1.83333
ENSGALG00000003795	1.24387e-15	0.23252	0.407	0.307	1.12856e-11	1	ENSGALG00000003795	DENR	1.32573
ENSGALG00000000707	1.36468e-15	0.227514	0.374	0.274	1.23817e-11	1	ENSGALG00000000707	PSMD7	1.36496
ENSGALG00000011409	1.39373e-15	0.140409	0.81	0.746	1.26453e-11	1	ENSGALG00000011409	SNRPF	1.08579
ENSGALG00000036935	1.45466e-15	0.230542	0.46	0.361	1.31981e-11	1	ENSGALG00000036935	CCDC86	1.27424
ENSGALG00000014513	1.46418e-15	0.316674	0.214	0.115	1.32845e-11	1	ENSGALG00000014513	CDCA3	1.86087
ENSGALG00000014841	1.87208e-15	0.212922	0.429	0.328	1.69854e-11	1	ENSGALG00000014841	HDDC2	1.30793
ENSGALG00000042254	2.09008e-15	0.251546	0.299	0.209	1.89633e-11	1	ENSGALG00000042254		1.43062
ENSGALG00000029476	2.5967e-15	0.212176	0.483	0.371	2.35599e-11	1	ENSGALG00000029476	XPO1	1.30189
ENSGALG00000002531	2.83925e-15	0.256586	0.346	0.242	2.57605e-11	1	ENSGALG00000002531	UP_SF3B3	1.42975
ENSGALG00000025759	3.88988e-15	0.249177	0.283	0.188	3.52928e-11	1	ENSGALG00000025759	TFDP2	1.50532
ENSGALG00000014897	4.17704e-15	0.240916	0.278	0.178	3.78983e-11	1	ENSGALG00000014897	TYMS	1.5618
ENSGALG00000041625	4.94236e-15	0.175881	0.516	0.422	4.4842e-11	1	ENSGALG00000041625	LSM5	1.22275
ENSGALG00000008289	5.01333e-15	0.213278	0.3	0.202	4.54859e-11	1	ENSGALG00000008289	RBM19	1.48515
ENSGALG00000009110	6.50544e-15	0.207606	0.376	0.273	5.90239e-11	1	ENSGALG00000009110	LSM8	1.37729
ENSGALG00000016582	1.05544e-14	0.278409	0.283	0.163	9.57597e-11	1	ENSGALG00000016582	PBK	1.7362
ENSGALG00000043002	1.30387e-14	0.106047	0.952	0.919	1.183e-10	1	ENSGALG00000043002	TOMM6	1.03591
ENSGALG00000028851	1.60254e-14	0.210062	0.406	0.306	1.45399e-10	1	ENSGALG00000028851	RAB8A	1.3268
ENSGALG00000009071	1.63763e-14	0.155615	0.761	0.683	1.48582e-10	1	ENSGALG00000009071	HMGB3	1.1142
ENSGALG00000032642	1.67294e-14	0.19885	0.408	0.309	1.51786e-10	1	ENSGALG00000032642	SMARCC1	1.32039
ENSGALG00000013018	1.70795e-14	0.209849	0.236	0.153	1.54963e-10	1	ENSGALG00000013018	TPRKB	1.54248
ENSGALG00000001283	2.05096e-14	0.229109	0.4	0.299	1.86084e-10	1	ENSGALG00000001283	SRRM1	1.33779
ENSGALG00000000456	2.14516e-14	0.124657	0.868	0.803	1.94631e-10	1	ENSGALG00000000456	MRPS21	1.08095
ENSGALG00000007153	2.98872e-14	0.164573	0.706	0.62	2.71166e-10	1	ENSGALG00000007153	DYL1	1.13871
ENSGALG00000003947	3.49474e-14	0.135499	0.764	0.707	3.17078e-10	1	ENSGALG00000003947	HNRNPH3	1.08062
ENSGALG00000038812	4.56579e-14	0.188679	0.448	0.359	4.14254e-10	1	ENSGALG00000038812	MRPL27	1.24791
ENSGALG00000005535	5.33492e-14	0.237825	0.245	0.161	4.84037e-10	1	ENSGALG00000005535	TCOF1	1.52174
ENSGALG00000016764	5.7e-14	0.213081	0.536	0.419	5.17161e-10	1	ENSGALG00000016764	EIF5B	1.27924
ENSGALG00000008587	5.79184e-14	0.197079	0.299	0.208	5.25494e-10	1	ENSGALG00000008587	NDUFAF1	1.4375
ENSGALG00000033781	6.1367e-14	0.217527	0.22	0.136	5.56783e-10	1	ENSGALG00000033781	FEN1	1.61765
ENSGALG00000042309	7.1271e-14	0.103035	0.921	0.891	6.46641e-10	1	ENSGALG00000042309	CHURC1	1.03367
ENSGALG00000004143	8.3384e-14	0.174881	0.584	0.502	7.56543e-10	1	ENSGALG00000004143	YWHAB	1.16335
ENSGALG00000037944	9.43477e-14	0.204143	0.17	0.093	8.56017e-10	1	ENSGALG00000037944	LNPK	1.82796
ENSGALG00000013916	9.47185e-14	0.169582	0.629	0.534	8.59381e-10	1	ENSGALG00000013916	HYPK	1.1779
ENSGALG00000023191	1.05473e-13	0.216379	0.359	0.261	9.56958e-10	1	ENSGALG00000023191	MRPS18C	1.37548
ENSGALG00000005782	1.12892e-13	0.240325	0.294	0.21	1.02426e-09	1	ENSGALG00000005782	DNTTIP2	1.4
ENSGALG00000028302	1.22735e-13	0.179633	0.569	0.465	1.11358e-09	1	ENSGALG00000028302	UQCRQ	1.22366
ENSGALG00000000470	1.26335e-13	0.212356	0.383	0.283	1.14624e-09	1	ENSGALG00000000470	LMNB2	1.35336
ENSGALG00000015704	1.34212e-13	0.120373	0.905	0.886	1.21771e-09	1	ENSGALG00000015704	TXN	1.02144
ENSGALG00000009985	1.38619e-13	0.185754	0.48	0.388	1.25769e-09	1	ENSGALG00000009985	LSM6	1.23711
ENSGALG00000005587	1.40765e-13	0.131937	0.813	0.749	1.27716e-09	1	ENSGALG00000005587	EIF4G2	1.08545
ENSGALG00000008187	1.62218e-13	0.236779	0.362	0.26	1.4718e-09	1	ENSGALG00000008187	EIF3J	1.39231
ENSGALG00000033926	1.64703e-13	0.202272	0.287	0.21	1.49435e-09	1	ENSGALG00000033926	CBX1	1.36667
ENSGALG00000028937	1.79658e-13	0.151485	0.749	0.666	1.63004e-09	1	ENSGALG00000028937	TIMM13	1.12462
ENSGALG00000012484	1.99478e-13	0.213267	0.159	0.088	1.80986e-09	1	ENSGALG00000012484	RIF1	1.80682
ENSGALG00000031401	2.11973e-13	0.254666	0.251	0.161	1.92323e-09	1	ENSGALG00000031401		1.55901
ENSGALG00000023066	2.11999e-13	0.234644	0.321	0.22	1.92346e-09	1	ENSGALG00000023066	DNAJA1	1.45909
ENSGALG00000035869	2.21871e-13	0.216607	0.202	0.13	2.01303e-09	1	ENSGALG00000035869	ATAD3A	1.55385
ENSGALG00000002624	2.32166e-13	0.227149	0.293	0.208	2.10645e-09	1	ENSGALG00000002624	BMS1	1.40865
ENSGALG00000001949	2.78787e-13	0.162406	0.492	0.424	2.52944e-09	1	ENSGALG00000001949	MDH2	1.16038
ENSGALG00000032993	3.61486e-13	0.248319	0.203	0.121	3.27976e-09	1	ENSGALG00000032993	FTSJ3	1.67769
ENSGALG00000040987	3.76754e-13	0.165479	0.661	0.591	3.41829e-09	1	ENSGALG00000040987	NDUFA8	1.11844
ENSGALG00000012702	3.89226e-13	0.214973	0.178	0.105	3.53145e-09	1	ENSGALG00000012702	JARID2	1.69524
ENSGALG00000006113	3.98235e-13	0.208557	0.339	0.25	3.61319e-09	1	ENSGALG00000006113	ZNF326	1.356
ENSGALG00000009553	4.38117e-13	0.274466	0.185	0.101	3.97504e-09	1	ENSGALG00000009553	SMC4	1.83168
ENSGALG00000017077	4.78722e-13	0.230971	0.183	0.103	4.34344e-09	1	ENSGALG00000017077	HSPH1	1.7767
ENSGALG00000014573	5.22536e-13	0.205215	0.169	0.099	4.74097e-09	1	ENSGALG00000014573	NAT10	1.70707
ENSGALG00000035421	5.63766e-13	0.150844	0.718	0.618	5.11505e-09	1	ENSGALG00000035421	SNRPB	1.16181
ENSGALG00000000895	6.10737e-13	0.203511	0.278	0.197	5.54122e-09	1	ENSGALG00000000895	NUDC	1.41117
ENSGALG00000008613	6.43921e-13	0.162486	0.613	0.527	5.8423e-09	1	ENSGALG00000008613	NDUFA1	1.16319
ENSGALG00000011020	6.50369e-13	0.162806	0.639	0.541	5.9008e-09	1	ENSGALG00000011020	CYCS	1.18115
ENSGALG00000011581	6.87545e-13	0.209267	0.17	0.103	6.23809e-09	1	ENSGALG00000011581	KIF26A	1.65049
ENSGALG00000007528	6.93378e-13	0.206147	0.258	0.165	6.29101e-09	1	ENSGALG00000007528	TCERG1	1.56364
ENSGALG00000007822	7.2609e-13	0.220305	0.359	0.266	6.58781e-09	1	ENSGALG00000007822	MRPL58	1.34962
ENSGALG00000028958	7.49968e-13	0.201492	0.294	0.208	6.80446e-09	1	ENSGALG00000028958	NOL9	1.41346
ENSGALG00000040864	8.2327e-13	0.222156	0.214	0.137	7.46953e-09	1	ENSGALG00000040864	WDR77	1.56204
ENSGALG00000004133	8.32524e-13	0.195501	0.43	0.328	7.55349e-09	1	ENSGALG00000004133	SRSF10	1.31098
ENSGALG00000040976	8.90878e-13	0.210095	0.36	0.27	8.08293e-09	1	ENSGALG00000040976	ACTR6	1.33333
ENSGALG00000008957	9.1704e-13	0.194859	0.156	0.093	8.3203e-09	1	ENSGALG00000008957	MSH6	1.67742
ENSGALG00000028648	9.49645e-13	0.197703	0.2	0.127	8.61613e-09	1	ENSGALG00000028648	CCDC59	1.5748
ENSGALG00000029789	1.01514e-12	0.222728	0.353	0.26	9.21037e-09	1	ENSGALG00000029789	PPP1R2	1.35769
ENSGALG00000004304	1.18996e-12	0.199988	0.426	0.34	1.07965e-08	1	ENSGALG00000004304	TCF12	1.25294
ENSGALG00000036019	1.49144e-12	0.212674	0.286	0.205	1.35318e-08	1	ENSGALG00000036019	SPAG1	1.39512
ENSGALG00000000990	1.62096e-12	0.17943	0.48	0.377	1.4707e-08	1	ENSGALG00000000990	SRSF6	1.27321
ENSGALG00000013365	1.75013e-12	0.202053	0.362	0.27	1.58789e-08	1	ENSGALG00000013365	SAFB	1.34074
ENSGALG00000003786	2.03007e-12	0.215029	0.405	0.308	1.84188e-08	1	ENSGALG00000003786	BRD7	1.31494
ENSGALG00000011797	2.17004e-12	0.209608	0.183	0.115	1.96888e-08	1	ENSGALG00000011797	MTHFD1	1.5913
ENSGALG00000031120	2.30229e-12	0.135744	0.753	0.675	2.08887e-08	1	ENSGALG00000031120	HNRNPH1	1.11556
ENSGALG00000008368	2.41815e-12	0.227514	0.165	0.099	2.19399e-08	1	ENSGALG00000008368	RAD18	1.66667
ENSGALG00000009332	2.66421e-12	0.181302	0.315	0.231	2.41724e-08	1	ENSGALG00000009332	RBM25	1.36364
ENSGALG00000000533	2.86456e-12	0.157512	0.666	0.59	2.59902e-08	1	ENSGALG00000000533	SRSF3	1.12881
ENSGALG00000032219	3.02552e-12	0.160374	0.581	0.487	2.74505e-08	1	ENSGALG00000032219	FUS	1.19302
ENSGALG00000004108	3.17534e-12	0.194662	0.285	0.212	2.88099e-08	1	ENSGALG00000004108	CCAR1	1.34434
ENSGALG00000001363	3.59547e-12	0.222811	0.188	0.114	3.26217e-08	1	ENSGALG00000001363	MYBBP1A	1.64912
ENSGALG00000008550	3.72324e-12	0.188464	0.336	0.251	3.3781e-08	1	ENSGALG00000008550	MRPS5	1.33865
ENSGALG00000006531	4.06749e-12	0.197648	0.429	0.344	3.69043e-08	1	ENSGALG00000006531	TRA2B	1.24709
ENSGALG00000027963	4.24956e-12	0.0767394	0.954	0.929	3.85563e-08	1	ENSGALG00000027963	COX7C	1.02691
ENSGALG00000002222	4.40924e-12	0.204916	0.187	0.114	4.0005e-08	1	ENSGALG00000002222	NOC2L	1.64035
ENSGALG00000041060	6.0577e-12	0.169128	0.637	0.552	5.49615e-08	1	ENSGALG00000041060	MRPL33	1.15399
ENSGALG00000011377	7.1627e-12	0.179124	0.264	0.192	6.49872e-08	1	ENSGALG00000011377	METAP2	1.375
ENSGALG00000014788	7.27622e-12	0.258295	0.184	0.101	6.60172e-08	1	ENSGALG00000014788	CENPH	1.82178
ENSGALG00000017025	7.71479e-12	0.238146	0.377	0.256	6.99963e-08	1	ENSGALG00000017025	CKAP2	1.47266
ENSGALG00000008939	8.52986e-12	0.129479	0.67	0.604	7.73914e-08	1	ENSGALG00000008939	FUBP1	1.10927
ENSGALG00000026978	8.95942e-12	0.0428243	1	0.999	8.12888e-08	1	ENSGALG00000026978	RPL29	1.001
ENSGALG00000010285	9.0345e-12	0.186189	0.367	0.281	8.197e-08	1	ENSGALG00000010285	MRPL14	1.30605
ENSGALG00000016946	9.4756e-12	0.170044	0.365	0.279	8.59722e-08	1	ENSGALG00000016946	SUGT1	1.30824
ENSGALG00000029172	1.02512e-11	0.117554	0.766	0.694	9.30092e-08	1	ENSGALG00000029172	NDUFC2	1.10375
ENSGALG00000012876	1.12025e-11	0.114783	0.647	0.591	1.0164e-07	1	ENSGALG00000012876	SSBP1	1.09475
ENSGALG00000009732	1.18467e-11	0.196926	0.19	0.117	1.07485e-07	1	ENSGALG00000009732	PCDH18	1.62393
ENSGALG00000038528	1.30293e-11	0.219461	0.36	0.267	1.18215e-07	1	ENSGALG00000038528	SRSF7L	1.34831
ENSGALG00000005961	1.32698e-11	0.193254	0.273	0.193	1.20397e-07	1	ENSGALG00000005961	dAK	1.41451
ENSGALG00000008586	1.44713e-11	0.211222	0.431	0.311	1.31298e-07	1	ENSGALG00000008586	TUBB	1.38585
ENSGALG00000002495	1.50053e-11	0.09061	0.972	0.94	1.36143e-07	1	ENSGALG00000002495	CHCHD2	1.03404
ENSGALG00000035841	1.53912e-11	0.16967	0.354	0.267	1.39644e-07	1	ENSGALG00000035841	RCJMB04	1.32584
ENSGALG00000001640	1.65169e-11	0.207643	0.215	0.141	1.49858e-07	1	ENSGALG00000001640	RNF122	1.52482
ENSGALG00000036552	1.67751e-11	0.158586	0.378	0.309	1.522e-07	1	ENSGALG00000036552	PDAP1	1.2233
ENSGALG00000041102	1.70855e-11	0.196727	0.255	0.174	1.55017e-07	1	ENSGALG00000041102	CDK5RAP2	1.46552
ENSGALG00000012721	1.76563e-11	0.23217	0.256	0.179	1.60196e-07	1	ENSGALG00000012721	C2H6orf52	1.43017
ENSGALG00000021340	2.29773e-11	0.154801	0.206	0.144	2.08473e-07	1	ENSGALG00000021340	CA9	1.43056
ENSGALG00000033001	2.40667e-11	0.0975075	0.9	0.853	2.18357e-07	1	ENSGALG00000033001	ATP5J2	1.0551
ENSGALG00000003265	2.5033e-11	0.173886	0.333	0.249	2.27124e-07	1	ENSGALG00000003265	PTP4A2	1.33735
ENSGALG00000015656	2.78056e-11	0.217855	0.261	0.177	2.52281e-07	1	ENSGALG00000015656	AKAP2	1.47458
ENSGALG00000000650	3.23127e-11	0.191896	0.419	0.321	2.93174e-07	1	ENSGALG00000000650	NIP7	1.3053
ENSGALG00000003355	3.26052e-11	0.199182	0.295	0.218	2.95827e-07	1	ENSGALG00000003355	NOP16	1.35321
ENSGALG00000001101	3.40339e-11	0.178728	0.374	0.292	3.08789e-07	1	ENSGALG00000001101	MBD3	1.28082
ENSGALG00000000428	3.42734e-11	0.119604	0.678	0.605	3.10963e-07	1	ENSGALG00000000428	chPKCI HINT1Z	1.12066
ENSGALG00000039629	3.69448e-11	0.209635	0.159	0.09	3.352e-07	1	ENSGALG00000039629	HOXD11	1.76667
ENSGALG00000036837	3.8813e-11	0.170976	0.404	0.316	3.5215e-07	1	ENSGALG00000036837	PTGES3	1.27848
ENSGALG00000016410	3.91832e-11	0.191504	0.397	0.312	3.55509e-07	1	ENSGALG00000016410	EIF1AY	1.27244
ENSGALG00000040873	4.14906e-11	0.203213	0.198	0.133	3.76444e-07	1	ENSGALG00000040873	MRPL3	1.48872
ENSGALG00000017350	4.18381e-11	0.232121	0.233	0.148	3.79597e-07	1	ENSGALG00000017350	RRM1	1.57432
ENSGALG00000000397	4.29101e-11	0.206632	0.19	0.124	3.89323e-07	1	ENSGALG00000000397	IPO9	1.53226
ENSGALG00000001803	4.81171e-11	0.175781	0.285	0.208	4.36567e-07	1	ENSGALG00000001803	IWS1	1.37019
ENSGALG00000036240	5.01889e-11	0.159432	0.523	0.433	4.55364e-07	1	ENSGALG00000036240	AKAP12	1.20785
ENSGALG00000017153	5.48662e-11	0.18075	0.257	0.176	4.97801e-07	1	ENSGALG00000017153	RDX	1.46023
ENSGALG00000016444	5.61737e-11	0.171135	0.404	0.317	5.09664e-07	1	ENSGALG00000016444	ODC1	1.27445
ENSGALG00000000137	5.85119e-11	0.0819759	0.909	0.869	5.30878e-07	1	ENSGALG00000000137	SNRPE	1.04603
ENSGALG00000003882	6.21897e-11	0.131241	0.549	0.48	5.64247e-07	1	ENSGALG00000003882	SMARCE1	1.14375
ENSGALG00000003092	6.40916e-11	0.187579	0.241	0.165	5.81504e-07	1	ENSGALG00000003092	ERLIN2	1.46061
ENSGALG00000003085	6.49803e-11	0.189101	0.375	0.257	5.89566e-07	1	ENSGALG00000003085	CDK1	1.45914
ENSGALG00000043359	6.5846e-11	0.190568	0.16	0.099	5.9742e-07	1	ENSGALG00000043359	RRP9	1.61616
ENSGALG00000007556	6.66212e-11	0.193272	0.246	0.176	6.04454e-07	1	ENSGALG00000007556	ORAOV1	1.39773
ENSGALG00000006617	7.72231e-11	0.200242	0.223	0.157	7.00645e-07	1	ENSGALG00000006617	BCCIP	1.42038
ENSGALG00000006939	8.11727e-11	0.196739	0.192	0.127	7.36479e-07	1	ENSGALG00000006939	PFKP	1.51181
ENSGALG00000029140	8.47491e-11	0.173087	0.199	0.127	7.68928e-07	1	ENSGALG00000029140	CRABP2	1.56693
ENSGALG00000009250	9.01169e-11	0.0984934	0.846	0.796	8.17631e-07	1	ENSGALG00000009250	HNRNPA3	1.06281
ENSGALG00000022813	9.97338e-11	0.142988	0.557	0.482	9.04885e-07	1	ENSGALG00000022813	NDUFV3	1.1556
ENSGALG00000042941	1.00057e-10	0.141304	0.589	0.517	9.07818e-07	1	ENSGALG00000042941	MRPL9	1.13926
ENSGALG00000011625	1.00143e-10	0.199093	0.346	0.259	9.08595e-07	1	ENSGALG00000011625	MRPL18	1.33591
ENSGALG00000012229	1.00193e-10	0.0515177	1	0.996	9.09053e-07	1	ENSGALG00000012229	RPS29	1.00402
ENSGALG00000008249	1.03028e-10	0.145871	0.285	0.219	9.34776e-07	1	ENSGALG00000008249	DNAJC2	1.30137
ENSGALG00000023199	1.11146e-10	0.13875	0.633	0.559	1.00843e-06	1	ENSGALG00000023199	HNRNPDL	1.13238
ENSGALG00000013726	1.16786e-10	0.196539	0.277	0.203	1.0596e-06	1	ENSGALG00000013726	AIRC	1.36453
ENSGALG00000021473	1.20645e-10	0.176579	0.433	0.338	1.09461e-06	1	ENSGALG00000021473	FAM192A	1.28107
ENSGALG00000015340	1.29187e-10	0.206357	0.221	0.143	1.17212e-06	1	ENSGALG00000015340	TGS1	1.54545
ENSGALG00000032329	1.35659e-10	0.181359	0.186	0.117	1.23083e-06	1	ENSGALG00000032329	NPM3	1.58974
ENSGALG00000006456	1.41472e-10	0.186146	0.175	0.108	1.28358e-06	1	ENSGALG00000006456	C16orf45	1.62037
ENSGALG00000029817	1.83428e-10	0.165271	0.183	0.121	1.66424e-06	1	ENSGALG00000029817	USP22	1.5124
ENSGALG00000009369	1.93244e-10	0.173465	0.357	0.27	1.7533e-06	1	ENSGALG00000009369	PRDX3	1.32222
ENSGALG00000012724	2.24566e-10	0.167028	0.172	0.113	2.03749e-06	1	ENSGALG00000012724	PAK1IP1	1.52212
ENSGALG00000030070	2.2606e-10	0.17816	0.216	0.147	2.05104e-06	1	ENSGALG00000030070	QDPR	1.46939
ENSGALG00000035645	2.28904e-10	0.153711	0.39	0.324	2.07684e-06	1	ENSGALG00000035645	GNAI2	1.2037
ENSGALG00000006743	2.32855e-10	0.195972	0.174	0.106	2.11269e-06	1	ENSGALG00000006743	YWHAH	1.64151
ENSGALG00000005559	2.45756e-10	0.17751	0.35	0.277	2.22975e-06	1	ENSGALG00000005559	MRPS23	1.26354
ENSGALG00000029980	2.46867e-10	0.177751	0.246	0.179	2.23982e-06	1	ENSGALG00000029980	QARS	1.3743
ENSGALG00000011811	2.74464e-10	0.169701	0.271	0.201	2.49021e-06	1	ENSGALG00000011811	SYNE2	1.34826
ENSGALG00000032148	2.8265e-10	0.182245	0.223	0.159	2.56449e-06	1	ENSGALG00000032148	CANX	1.40252
ENSGALG00000007021	2.92719e-10	0.188752	0.2	0.126	2.65584e-06	1	ENSGALG00000007021	PCNT	1.5873
ENSGALG00000005487	3.16527e-10	0.18519	0.221	0.156	2.87185e-06	1	ENSGALG00000005487	CCDC12	1.41667
ENSGALG00000035836	3.47701e-10	0.150479	0.758	0.669	3.15469e-06	1	ENSGALG00000035836	LDHB	1.13303
ENSGALG00000016704	3.59693e-10	0.15735	0.468	0.389	3.2635e-06	1	ENSGALG00000016704	CDC5L	1.20308
ENSGALG00000014789	3.70934e-10	0.176731	0.342	0.266	3.36548e-06	1	ENSGALG00000014789	MRPS36	1.28571
ENSGALG00000038801	3.87324e-10	0.106158	0.803	0.736	3.51419e-06	1	ENSGALG00000038801	ATP5B	1.09103
ENSGALG00000000629	3.89931e-10	0.154424	0.596	0.522	3.53785e-06	1	ENSGALG00000000629	CD320	1.14176
ENSGALG00000007520	3.9831e-10	0.172521	0.31	0.231	3.61387e-06	1	ENSGALG00000007520	SSRP1	1.34199
ENSGALG00000036962	4.85227e-10	0.170088	0.16	0.104	4.40246e-06	1	ENSGALG00000036962	KPNB1	1.53846
ENSGALG00000000529	5.05196e-10	0.17421	0.316	0.245	4.58364e-06	1	ENSGALG00000000529	LIMD2	1.2898
ENSGALG00000004442	5.08626e-10	0.1803	0.322	0.244	4.61476e-06	1	ENSGALG00000004442	PPA1	1.31967
ENSGALG00000006561	5.83181e-10	0.145469	0.451	0.372	5.2912e-06	1	ENSGALG00000006561	MRPL23	1.21237
ENSGALG00000014804	5.87967e-10	0.198345	0.151	0.089	5.33462e-06	1	ENSGALG00000014804	THBS4	1.69663
ENSGALG00000035489	6.84594e-10	0.279095	0.559	0.519	6.21132e-06	1	ENSGALG00000035489	Wpkci-8	1.07707
ENSGALG00000009045	7.14255e-10	0.172643	0.428	0.339	6.48044e-06	1	ENSGALG00000009045	EBNA1BP2	1.26254
ENSGALG00000007555	7.63793e-10	0.177548	0.238	0.17	6.9299e-06	1	ENSGALG00000007555	CCND1	1.4
ENSGALG00000007768	8.41893e-10	0.26776	0.202	0.113	7.6385e-06	1	ENSGALG00000007768	AURKA	1.78761
ENSGALG00000001330	8.4233e-10	0.0982965	0.86	0.812	7.64246e-06	1	ENSGALG00000001330	ATP5G1	1.05911
ENSGALG00000033690	8.58038e-10	0.168222	0.245	0.172	7.78498e-06	1	ENSGALG00000033690	RSL1D1	1.42442
ENSGALG00000002661	9.33517e-10	0.0906445	0.838	0.789	8.4698e-06	1	ENSGALG00000002661	YWHAE	1.0621
ENSGALG00000001555	9.37365e-10	0.190572	0.256	0.196	8.50472e-06	1	ENSGALG00000001555	AURKAIP1	1.30612
ENSGALG00000002853	1.00026e-09	0.19609	0.242	0.167	9.07537e-06	1	ENSGALG00000002853	CFDP1	1.4491
ENSGALG00000003467	1.04089e-09	0.17511	0.16	0.101	9.44395e-06	1	ENSGALG00000003467	BYSL	1.58416
ENSGALG00000012165	1.063e-09	0.257304	0.207	0.115	9.64461e-06	1	ENSGALG00000012165	DLGAP5	1.8
ENSGALG00000007843	1.20039e-09	0.114414	0.65	0.596	1.08912e-05	1	ENSGALG00000007843	ATRX	1.0906
ENSGALG00000011305	1.28156e-09	0.169838	0.309	0.224	1.16276e-05	1	ENSGALG00000011305	SRSF11	1.37946
ENSGALG00000004353	1.37604e-09	0.130137	0.581	0.507	1.24848e-05	1	ENSGALG00000004353	TBCA	1.14596
ENSGALG00000004465	1.53435e-09	0.162365	0.295	0.219	1.39212e-05	1	ENSGALG00000004465	PALD1	1.34703
ENSGALG00000035030	1.53501e-09	0.265641	0.189	0.109	1.39272e-05	1	ENSGALG00000035030	KIF20A	1.73394
ENSGALG00000004115	1.61544e-09	0.144189	0.429	0.347	1.46569e-05	1	ENSGALG00000004115	DNAJA2	1.23631
ENSGALG00000012834	1.65047e-09	0.125363	0.44	0.371	1.49747e-05	1	ENSGALG00000012834	AKR1D1	1.18598
ENSGALG00000010671	1.73225e-09	0.163106	0.266	0.199	1.57167e-05	1	ENSGALG00000010671	HNRNPU	1.33668
ENSGALG00000002033	1.92818e-09	0.105363	0.728	0.66	1.74944e-05	1	ENSGALG00000002033	NDUFB6	1.10303
ENSGALG00000009967	1.92836e-09	0.165319	0.256	0.193	1.7496e-05	1	ENSGALG00000009967	LRPPRC	1.32642
ENSGALG00000006910	2.19188e-09	0.164175	0.404	0.331	1.9887e-05	1	ENSGALG00000006910	IMPDH	1.22054
ENSGALG00000011271	2.35744e-09	0.162347	0.244	0.171	2.1389e-05	1	ENSGALG00000011271	LUM	1.4269
ENSGALG00000042822	2.36336e-09	0.159032	0.344	0.269	2.14428e-05	1	ENSGALG00000042822	TAX1BP1	1.27881
ENSGALG00000008858	2.43444e-09	0.143147	0.53	0.447	2.20877e-05	1	ENSGALG00000008858	MDH1	1.18568
ENSGALG00000006077	2.45826e-09	0.106503	0.653	0.574	2.23038e-05	1	ENSGALG00000006077	C11orf58	1.13763
ENSGALG00000004554	2.49302e-09	0.175677	0.188	0.127	2.26192e-05	1	ENSGALG00000004554	CACYBP	1.48031
ENSGALG00000008091	2.57176e-09	0.180587	0.215	0.155	2.33336e-05	1	ENSGALG00000008091	PTPMT1	1.3871
ENSGALG00000026492	2.5827e-09	0.154454	0.383	0.319	2.34328e-05	1	ENSGALG00000026492	EMC6	1.20063
ENSGALG00000007900	2.6492e-09	0.169575	0.178	0.12	2.40362e-05	1	ENSGALG00000007900	COMMD3	1.48333
ENSGALG00000029674	2.79652e-09	0.195618	0.199	0.139	2.53729e-05	1	ENSGALG00000029674	POM121CL	1.43165
ENSGALG00000013191	3.2149e-09	0.129726	0.444	0.383	2.91688e-05	1	ENSGALG00000013191	NDUFS6	1.15927
ENSGALG00000004161	3.29687e-09	0.251077	0.254	0.159	2.99125e-05	1	ENSGALG00000004161	CCNB2	1.59748
ENSGALG00000014526	3.3787e-09	0.122329	0.721	0.648	3.06549e-05	1	ENSGALG00000014526	TPI1	1.11265
ENSGALG00000001992	3.55061e-09	0.149569	0.665	0.564	3.22147e-05	1	ENSGALG00000001992	PKM	1.17908
ENSGALG00000009961	3.75327e-09	0.174345	0.26	0.194	3.40534e-05	1	ENSGALG00000009961	RLI	1.34021
ENSGALG00000005001	3.77235e-09	0.169931	0.596	0.498	3.42265e-05	1	ENSGALG00000005001	CNBP	1.19679
ENSGALG00000042539	3.99157e-09	0.143846	0.463	0.38	3.62155e-05	1	ENSGALG00000042539	NNF1	1.21842
ENSGALG00000014753	4.11705e-09	0.187979	0.199	0.132	3.7354e-05	1	ENSGALG00000014753	CENPK	1.50758
ENSGALG00000004003	4.1523e-09	0.17645	0.193	0.131	3.76739e-05	1	ENSGALG00000004003	AIFM1	1.47328
ENSGALG00000011504	4.6662e-09	0.172061	0.291	0.225	4.23364e-05	1	ENSGALG00000011504	TMPO	1.29333
ENSGALG00000007974	4.90631e-09	0.169304	0.214	0.148	4.4515e-05	1	ENSGALG00000007974	NUP85	1.44595
ENSGALG00000035769	5.32343e-09	0.164517	0.21	0.142	4.82995e-05	1	ENSGALG00000035769	EPB41L2	1.47887
ENSGALG00000008569	6.35243e-09	0.164819	0.192	0.133	5.76356e-05	1	ENSGALG00000008569	CHP1	1.44361
ENSGALG00000002060	6.46157e-09	0.144656	0.412	0.34	5.86258e-05	1	ENSGALG00000002060	TAF15	1.21176
ENSGALG00000009544	7.10164e-09	0.171403	0.203	0.146	6.44332e-05	1	ENSGALG00000009544	ZCRB1	1.39041
ENSGALG00000033120	8.19813e-09	0.111489	0.691	0.621	7.43816e-05	1	ENSGALG00000033120	SRSF7	1.11272
ENSGALG00000009835	8.32084e-09	0.155854	0.174	0.124	7.5495e-05	1	ENSGALG00000009835	XPOT	1.40323
ENSGALG00000002612	8.32791e-09	0.171418	0.31	0.237	7.55591e-05	1	ENSGALG00000002612	U2SURP	1.30802
ENSGALG00000000086	8.66128e-09	0.137491	0.346	0.278	7.85837e-05	1	ENSGALG00000000086	TIMM17A	1.2446
ENSGALG00000009451	8.83441e-09	0.157705	0.268	0.193	8.01546e-05	1	ENSGALG00000009451	PPID	1.3886
ENSGALG00000038362	9.26422e-09	0.16874	0.234	0.171	8.40543e-05	1	ENSGALG00000038362		1.36842
ENSGALG00000007138	9.66851e-09	0.172702	0.292	0.224	8.77224e-05	1	ENSGALG00000007138	MED28	1.30357
ENSGALG00000012759	1.01737e-08	0.166414	0.217	0.152	9.23056e-05	1	ENSGALG00000012759	NUP37	1.42763
ENSGALG00000031160	1.08649e-08	0.149532	0.322	0.256	9.85771e-05	1	ENSGALG00000031160		1.25781
ENSGALG00000004493	1.11407e-08	0.149929	0.244	0.178	0.00010108	1	ENSGALG00000004493	RSRC2	1.37079
ENSGALG00000016921	1.25161e-08	0.135349	0.297	0.235	0.000113559	1	ENSGALG00000016921	UCHL3	1.26383
ENSGALG00000029261	1.37126e-08	0.163841	0.299	0.23	0.000124415	1	ENSGALG00000029261	RTN4	1.3
ENSGALG00000032595	1.38836e-08	0.0778027	0.82	0.783	0.000125965	1	ENSGALG00000032595	NDUFB2	1.04725
ENSGALG00000006596	1.42822e-08	0.0812931	0.659	0.615	0.000129582	1	ENSGALG00000006596	SNRPD3	1.07154
ENSGALG00000007481	1.49686e-08	0.191439	0.216	0.154	0.00013581	1	ENSGALG00000007481	HACD3	1.4026
ENSGALG00000011570	1.56783e-08	0.127536	0.587	0.528	0.000142249	1	ENSGALG00000011570	ILF2	1.11174
ENSGALG00000007664	1.69615e-08	0.15863	0.318	0.247	0.000153892	1	ENSGALG00000007664	PSMD1	1.28745
ENSGALG00000039891	1.73147e-08	0.136311	0.332	0.254	0.000157097	1	ENSGALG00000039891	ANP32E	1.30709
ENSGALG00000034831	1.83122e-08	0.168843	0.187	0.13	0.000166147	1	ENSGALG00000034831	YTHDF2	1.43846
ENSGALG00000036892	2.04416e-08	0.213787	0.253	0.163	0.000185466	1	ENSGALG00000036892	BUB1B	1.55215
ENSGALG00000037726	2.1223e-08	0.130794	0.396	0.323	0.000192556	1	ENSGALG00000037726	MARCKS	1.22601
ENSGALG00000003205	2.24029e-08	0.110754	0.584	0.494	0.000203262	1	ENSGALG00000003205	EIF4EBP1	1.18219
ENSGALG00000003288	2.30159e-08	0.181181	0.195	0.134	0.000208823	1	ENSGALG00000003288	TARS	1.45522
ENSGALG00000011856	2.37699e-08	0.159938	0.498	0.427	0.000215664	1	ENSGALG00000011856	FMC1	1.16628
ENSGALG00000041461	2.52616e-08	0.153714	0.244	0.176	0.000229198	1	ENSGALG00000041461	DNMT3B	1.38636
ENSGALG00000028664	2.69214e-08	0.208577	0.204	0.131	0.000244257	1	ENSGALG00000028664	UP_CKS1B	1.55725
ENSGALG00000031796	2.84335e-08	0.15665	0.172	0.121	0.000257977	1	ENSGALG00000031796	SP3	1.42149
ENSGALG00000038672	2.95147e-08	0.181998	0.303	0.23	0.000267787	1	ENSGALG00000038672	ATPIF1	1.31739
ENSGALG00000003906	3.18424e-08	0.153495	0.171	0.114	0.000288906	1	ENSGALG00000003906	MPHOSPH10	1.5
ENSGALG00000017033	3.62046e-08	0.134481	0.336	0.27	0.000328485	1	ENSGALG00000017033	MRPS31	1.24444
ENSGALG00000003750	3.86133e-08	0.113366	0.26	0.197	0.000350339	1	ENSGALG00000003750	PLCG1	1.3198
ENSGALG00000026796	3.97937e-08	0.153163	0.331	0.261	0.000361048	1	ENSGALG00000026796	SNAPIN	1.2682
ENSGALG00000008746	4.0268e-08	0.153057	0.333	0.269	0.000365351	1	ENSGALG00000008746	MRPL41	1.23792
ENSGALG00000010463	4.51289e-08	0.16202	0.227	0.161	0.000409454	1	ENSGALG00000010463	AHSA1	1.40994
ENSGALG00000002524	4.62354e-08	0.131578	0.3	0.234	0.000419494	1	ENSGALG00000002524	UCHL5	1.28205
ENSGALG00000003475	4.658e-08	0.152374	0.352	0.278	0.00042262	1	ENSGALG00000003475	ACLY	1.26619
ENSGALG00000032142	4.67759e-08	0.022744	1	1	0.000424398	1	ENSGALG00000032142	MT-CO1	1
ENSGALG00000001717	5.72921e-08	0.16908	0.181	0.121	0.000519811	1	ENSGALG00000001717	SLC16A1	1.49587
ENSGALG00000010658	7.47255e-08	0.133715	0.353	0.291	0.000677984	1	ENSGALG00000010658	RWDD4	1.21306
ENSGALG00000039803	8.17523e-08	0.140899	0.465	0.389	0.000741739	1	ENSGALG00000039803	LSM12	1.19537
ENSGALG00000005338	8.71438e-08	0.0285517	1	0.999	0.000790656	1	ENSGALG00000005338	RPS21	1.001
ENSGALG00000004410	8.92713e-08	0.148293	0.3	0.235	0.000809959	1	ENSGALG00000004410	ANAPC16	1.2766
ENSGALG00000029523	9.10193e-08	0.168256	0.252	0.187	0.000825819	1	ENSGALG00000029523	RAD21	1.34759
ENSGALG00000008852	9.70447e-08	0.136946	0.266	0.204	0.000880487	1	ENSGALG00000008852	DNAJC19	1.30392
ENSGALG00000003547	1.00937e-07	0.142042	0.156	0.104	0.000915801	1	ENSGALG00000003547	SKP2	1.5
ENSGALG00000012946	1.0112e-07	0.147487	0.174	0.121	0.000917461	1	ENSGALG00000012946	FAM60A	1.43802
ENSGALG00000005667	1.04283e-07	0.135791	0.274	0.21	0.000946158	1	ENSGALG00000005667	UBE2G2	1.30476
ENSGALG00000002705	1.05183e-07	0.14613	0.222	0.167	0.000954329	1	ENSGALG00000002705	CISD1	1.32934
ENSGALG00000015118	1.052e-07	0.169035	0.161	0.112	0.000954478	1	ENSGALG00000015118	SMC5	1.4375
ENSGALG00000009971	1.09378e-07	0.24191	0.226	0.136	0.000992387	1	ENSGALG00000009971	CDC20	1.66176
ENSGALG00000039576	1.11784e-07	0.219881	0.226	0.14	0.00101422	1	ENSGALG00000039576	KNSTRN	1.61429
ENSGALG00000004834	1.12201e-07	0.149855	0.204	0.15	0.001018	1	ENSGALG00000004834	COPS3	1.36
ENSGALG00000011619	1.16494e-07	0.145141	0.161	0.111	0.00105695	1	ENSGALG00000011619	SIVA1	1.45045
ENSGALG00000002659	1.17443e-07	0.120385	0.206	0.152	0.00106556	1	ENSGALG00000002659	WDR5B	1.35526
ENSGALG00000000907	1.2197e-07	0.152175	0.29	0.217	0.00110664	1	ENSGALG00000000907	KARS	1.33641
ENSGALG00000009668	1.28997e-07	0.134127	0.28	0.221	0.00117039	1	ENSGALG00000009668	HPF1	1.26697
ENSGALG00000009615	1.49274e-07	0.171327	0.239	0.175	0.00135436	1	ENSGALG00000009615	RRP15	1.36571
ENSGALG00000006294	1.49945e-07	0.138809	0.3	0.238	0.00136045	1	ENSGALG00000006294	PSMD2	1.2605
ENSGALG00000007183	1.51632e-07	0.139358	0.193	0.14	0.00137576	1	ENSGALG00000007183	ERGIC2	1.37857
ENSGALG00000005694	1.55633e-07	0.181227	0.216	0.157	0.00141206	1	ENSGALG00000005694	GARS	1.3758
ENSGALG00000039897	1.62002e-07	0.14141	0.164	0.117	0.00146984	1	ENSGALG00000039897	FBXO22	1.40171
ENSGALG00000039315	1.63868e-07	0.124507	0.235	0.181	0.00148677	1	ENSGALG00000039315	MARS	1.29834
ENSGALG00000032456	1.66764e-07	0.0192251	1	1	0.00151305	1	ENSGALG00000032456	MT-CO2	1
ENSGALG00000029199	1.69448e-07	0.188555	0.18	0.123	0.0015374	1	ENSGALG00000029199	WDR55	1.46341
ENSGALG00000010079	1.70558e-07	0.116411	0.449	0.383	0.00154748	1	ENSGALG00000010079	HP1BP3	1.17232
ENSGALG00000005507	1.8216e-07	0.11951	0.58	0.539	0.00165274	1	ENSGALG00000005507	NONO	1.07607
ENSGALG00000035978	1.95897e-07	0.148738	0.263	0.199	0.00177738	1	ENSGALG00000035978	CDCA7L	1.32161
ENSGALG00000000734	2.02715e-07	0.154779	0.222	0.162	0.00183923	1	ENSGALG00000000734	RPA2	1.37037
ENSGALG00000041528	2.03437e-07	0.134043	0.186	0.137	0.00184579	1	ENSGALG00000041528	LMF2	1.35766
ENSGALG00000005707	2.28282e-07	0.103181	0.543	0.48	0.0020712	1	ENSGALG00000005707	IFT20	1.13125
ENSGALG00000014435	2.286e-07	0.120851	0.602	0.533	0.00207409	1	ENSGALG00000014435	MRPL51	1.12946
ENSGALG00000011637	2.39012e-07	0.121288	0.44	0.373	0.00216856	1	ENSGALG00000011637	TCP1	1.17962
ENSGALG00000030351	2.48989e-07	0.119777	0.267	0.216	0.00225907	1	ENSGALG00000030351	ILF3	1.23611
ENSGALG00000006446	2.63406e-07	0.138953	0.203	0.153	0.00238989	1	ENSGALG00000006446	NAP1L4	1.3268
ENSGALG00000001550	2.72213e-07	0.14216	0.402	0.332	0.00246979	1	ENSGALG00000001550	RBM39	1.21084
ENSGALG00000001962	2.97532e-07	0.123056	0.456	0.384	0.00269951	1	ENSGALG00000001962	PTBP1	1.1875
ENSGALG00000041080	2.98667e-07	0.130989	0.296	0.233	0.0027098	1	ENSGALG00000041080	CHD7	1.27039
ENSGALG00000016461	2.99024e-07	0.152433	0.293	0.233	0.00271304	1	ENSGALG00000016461	DDX1	1.25751
ENSGALG00000035677	3.10436e-07	0.0169586	0.999	1	0.00281658	1	ENSGALG00000035677	RPL35	0.999
ENSGALG00000007307	3.12935e-07	0.134468	0.183	0.134	0.00283926	1	ENSGALG00000007307	USP7	1.36567
ENSGALG00000010026	3.31383e-07	0.121142	0.223	0.169	0.00300664	1	ENSGALG00000010026	PPP1CB	1.31953
ENSGALG00000032830	3.31766e-07	0.111675	0.492	0.411	0.00301011	1	ENSGALG00000032830	Sep	1.19708
ENSGALG00000012007	3.372e-07	0.157175	0.42	0.349	0.00305941	1	ENSGALG00000012007	ST13	1.20344
ENSGALG00000005034	3.4674e-07	0.150028	0.232	0.175	0.00314597	1	ENSGALG00000005034	ACAD9	1.32571
ENSGALG00000010154	3.637e-07	0.127876	0.239	0.186	0.00329985	1	ENSGALG00000010154	GEMIN2	1.28495
ENSGALG00000000227	3.72964e-07	0.160903	0.234	0.182	0.00338391	1	ENSGALG00000000227	DPYSL2	1.28571
ENSGALG00000026300	3.80512e-07	0.0663069	0.798	0.787	0.00345239	1	ENSGALG00000026300	TOMM5	1.01398
ENSGALG00000001540	3.91208e-07	0.145523	0.224	0.172	0.00354943	1	ENSGALG00000001540	SF3A3	1.30233
ENSGALG00000004821	3.91746e-07	0.14168	0.153	0.104	0.00355431	1	ENSGALG00000004821	PTPN11	1.47115
ENSGALG00000033993	3.92428e-07	0.130711	0.205	0.149	0.0035605	1	ENSGALG00000033993	EIF6	1.37584
ENSGALG00000010178	4.28238e-07	0.167018	0.226	0.175	0.0038854	1	ENSGALG00000010178	PUM3	1.29143
ENSGALG00000014906	4.42823e-07	0.151445	0.249	0.198	0.00401773	1	ENSGALG00000014906	MOCS2	1.25758
ENSGALG00000009076	4.45969e-07	0.0709307	0.702	0.654	0.00404627	1	ENSGALG00000009076	NDUFB5	1.07339
ENSGALG00000010185	4.49946e-07	0.154936	0.154	0.103	0.00408236	1	ENSGALG00000010185	HSPA4L	1.49515
ENSGALG00000009899	4.59564e-07	0.140054	0.177	0.131	0.00416962	1	ENSGALG00000009899		1.35115
ENSGALG00000004203	4.82724e-07	0.129956	0.243	0.187	0.00437976	1	ENSGALG00000004203	PSMG3	1.29947
ENSGALG00000043006	5.52872e-07	0.142793	0.31	0.245	0.0050162	1	ENSGALG00000043006	PDIA4	1.26531
ENSGALG00000002906	5.60127e-07	0.146155	0.338	0.268	0.00508203	1	ENSGALG00000002906	TARDBP	1.26119
ENSGALG00000007473	5.63736e-07	0.127322	0.328	0.272	0.00511478	1	ENSGALG00000007473	MRPL28	1.20588
ENSGALG00000014395	5.7825e-07	0.142958	0.262	0.204	0.00524646	1	ENSGALG00000014395	DHX15	1.28431
ENSGALG00000003454	5.95589e-07	0.11835	0.511	0.435	0.00540378	1	ENSGALG00000003454	ZNF207	1.17471
ENSGALG00000029390	6.00957e-07	0.126243	0.245	0.193	0.00545248	1	ENSGALG00000029390	C12orf65	1.26943
ENSGALG00000043399	6.07435e-07	0.173013	0.206	0.139	0.00551126	1	ENSGALG00000043399	EZH2	1.48201
ENSGALG00000026517	6.15916e-07	0.122807	0.358	0.293	0.00558821	1	ENSGALG00000026517	RFC5	1.22184
ENSGALG00000003878	6.36107e-07	0.0974961	0.618	0.556	0.0057714	1	ENSGALG00000003878	PIN4	1.11151
ENSGALG00000034768	6.38665e-07	0.155172	0.167	0.119	0.0057946	1	ENSGALG00000034768	ESF1	1.40336
ENSGALG00000023335	6.49718e-07	0.16213	0.236	0.174	0.00589489	1	ENSGALG00000023335	Rchy1	1.35632
ENSGALG00000001602	6.76612e-07	0.106405	0.501	0.442	0.0061389	1	ENSGALG00000001602	NUTF2	1.13348
ENSGALG00000026009	6.902e-07	0.136952	0.326	0.272	0.00626219	1	ENSGALG00000026009	SRP9	1.19853
ENSGALG00000005807	7.03559e-07	0.114891	0.261	0.205	0.00638339	1	ENSGALG00000005807	IPO7	1.27317
ENSGALG00000026470	7.36482e-07	0.132048	0.309	0.247	0.0066821	1	ENSGALG00000026470	BOD1L1	1.25101
ENSGALG00000013883	7.47537e-07	0.115443	0.35	0.277	0.00678241	1	ENSGALG00000013883	SNRNP27	1.26354
ENSGALG00000006197	7.68088e-07	0.142403	0.269	0.207	0.00696887	1	ENSGALG00000006197	CSNK2A1	1.29952
ENSGALG00000014801	7.69172e-07	0.211066	0.155	0.088	0.00697869	1	ENSGALG00000014801	NDC80	1.76136
ENSGALG00000025842	8.03866e-07	0.0970957	0.452	0.387	0.00729348	1	ENSGALG00000025842	TPM2	1.16796
ENSGALG00000009565	8.09226e-07	0.120095	0.351	0.295	0.0073421	1	ENSGALG00000009565	EIF2S1	1.18983
ENSGALG00000003891	8.23237e-07	0.129135	0.291	0.221	0.00746923	1	ENSGALG00000003891	ZNF423	1.31674
ENSGALG00000011330	8.65133e-07	0.133209	0.279	0.222	0.00784935	1	ENSGALG00000011330	DYNC1H1	1.25676
ENSGALG00000016379	8.79933e-07	0.145526	0.197	0.147	0.00798363	1	ENSGALG00000016379	SMS	1.34014
ENSGALG00000035203	9.01538e-07	0.104855	0.338	0.29	0.00817965	1	ENSGALG00000035203	MCRS1	1.16552
ENSGALG00000009525	9.3445e-07	0.137193	0.158	0.114	0.00847826	1	ENSGALG00000009525	HAT1	1.38596
ENSGALG00000002089	9.35028e-07	0.140158	0.205	0.154	0.00848351	1	ENSGALG00000002089	TIMM23B	1.33117
ENSGALG00000001313	9.99249e-07	0.12732	0.461	0.389	0.00906619	1	ENSGALG00000001313	EIF4H	1.18509
ENSGALG00000039500	1.00598e-06	0.118747	0.268	0.221	0.00912729	1	ENSGALG00000039500	GSPT1	1.21267
ENSGALG00000003438	1.02509e-06	0.164249	0.16	0.095	0.00930062	1	ENSGALG00000003438	NUF2	1.68421
ENSGALG00000030994	1.05954e-06	0.0852388	0.525	0.463	0.00961322	1	ENSGALG00000030994	MRPL24	1.13391
ENSGALG00000042976	1.08078e-06	0.118182	0.162	0.124	0.00980591	1	ENSGALG00000042976	UBTF	1.30645
ENSGALG00000041390	1.09661e-06	0.107543	0.42	0.36	0.00994953	1	ENSGALG00000041390	TMEM141	1.16667
ENSGALG00000043607	1.11047e-06	0.146827	0.286	0.217	0.0100753	1	ENSGALG00000043607	CENPX	1.31797
ENSGALG00000017384	1.236e-06	0.0624501	0.791	0.744	0.0112142	1	ENSGALG00000017384	ERH	1.06317
ENSGALG00000029856	1.34584e-06	0.0725434	0.814	0.763	0.0122108	1	ENSGALG00000029856	TOMM7	1.06684
ENSGALG00000006043	1.35677e-06	0.130392	0.344	0.284	0.0123099	1	ENSGALG00000006043	RBBP6	1.21127
ENSGALG00000026757	1.42265e-06	0.125522	0.179	0.128	0.0129077	1	ENSGALG00000026757	DHFR	1.39844
ENSGALG00000029369	1.46226e-06	0.135825	0.194	0.141	0.0132671	1	ENSGALG00000029369	PREB	1.37589
ENSGALG00000038097	1.5849e-06	0.152638	0.247	0.192	0.0143798	1	ENSGALG00000038097	EI24	1.28646
ENSGALG00000037315	1.62068e-06	0.125	0.165	0.117	0.0147045	1	ENSGALG00000037315	KLHDC4	1.41026
ENSGALG00000039205	1.65776e-06	0.122448	0.348	0.293	0.0150409	1	ENSGALG00000039205	CCT3	1.18771
ENSGALG00000038078	1.69303e-06	0.11039	0.191	0.142	0.0153609	1	ENSGALG00000038078		1.34507
ENSGALG00000040259	1.73906e-06	0.123987	0.167	0.122	0.0157785	1	ENSGALG00000040259	DHPS	1.36885
ENSGALG00000041337	1.89912e-06	0.119896	0.225	0.179	0.0172307	1	ENSGALG00000041337	OTUD6B	1.25698
ENSGALG00000014118	1.92929e-06	0.117759	0.304	0.255	0.0175044	1	ENSGALG00000014118	MRPS26	1.19216
ENSGALG00000012039	1.93666e-06	0.104092	0.46	0.399	0.0175713	1	ENSGALG00000012039	PSMA3	1.15288
ENSGALG00000016198	1.97724e-06	0.10607	0.463	0.396	0.0179395	1	ENSGALG00000016198	U2AF1	1.16919
ENSGALG00000029449	2.02945e-06	0.134186	0.213	0.166	0.0184132	1	ENSGALG00000029449	RFC2	1.28313
ENSGALG00000042503	2.05059e-06	0.13196	0.375	0.305	0.018605	1	ENSGALG00000042503	HSPBP1	1.22951
ENSGALG00000009427	2.08244e-06	0.136791	0.225	0.18	0.018894	1	ENSGALG00000009427	TIAL1	1.25
ENSGALG00000009828	2.09722e-06	0.127931	0.158	0.11	0.0190281	1	ENSGALG00000009828	PPP2R5A	1.43636
ENSGALG00000032270	2.13175e-06	0.19555	0.157	0.094	0.0193413	1	ENSGALG00000032270	NCAPH	1.67021
ENSGALG00000029881	2.1983e-06	0.138521	0.182	0.132	0.0199451	1	ENSGALG00000029881	LAMTOR2	1.37879
ENSGALG00000012526	2.25265e-06	0.134105	0.231	0.176	0.0204383	1	ENSGALG00000012526	PRPF40A	1.3125
ENSGALG00000032316	2.26975e-06	0.125628	0.214	0.163	0.0205934	1	ENSGALG00000032316	CDV3	1.31288
ENSGALG00000007205	2.35347e-06	0.0333569	0.977	0.969	0.021353	1	ENSGALG00000007205	COX6A1	1.00826
ENSGALG00000025796	2.36994e-06	0.121842	0.171	0.124	0.0215025	1	ENSGALG00000025796	ADI1	1.37903
ENSGALG00000011476	2.3959e-06	0.0947868	0.275	0.219	0.021738	1	ENSGALG00000011476	Sep	1.25571
ENSGALG00000031265	2.42501e-06	0.127017	0.212	0.16	0.0220021	1	ENSGALG00000031265	MTIF2	1.325
ENSGALG00000015783	2.46488e-06	0.129908	0.18	0.129	0.0223638	1	ENSGALG00000015783	IMMT	1.39535
ENSGALG00000041283	2.50012e-06	0.102516	0.286	0.232	0.0226836	1	ENSGALG00000041283		1.23276
ENSGALG00000040626	2.56237e-06	0.0861895	0.702	0.637	0.0232484	1	ENSGALG00000040626	NDUFA2	1.10204
ENSGALG00000001587	2.62439e-06	0.142915	0.203	0.148	0.0238111	1	ENSGALG00000001587	MRPL40	1.37162
ENSGALG00000026225	2.64435e-06	0.112756	0.314	0.256	0.0239922	1	ENSGALG00000026225	PSMD12	1.22656
ENSGALG00000008530	2.72694e-06	0.126277	0.314	0.261	0.0247415	1	ENSGALG00000008530	EIF4A3	1.20307
ENSGALG00000007170	2.8446e-06	0.135438	0.388	0.324	0.0258091	1	ENSGALG00000007170	SNRPA1	1.19753
ENSGALG00000005907	2.89183e-06	0.134009	0.436	0.369	0.0262376	1	ENSGALG00000005907	RPN1	1.18157
ENSGALG00000010842	2.95026e-06	0.111434	0.198	0.159	0.0267677	1	ENSGALG00000010842		1.24528
ENSGALG00000000787	3.07946e-06	0.125797	0.174	0.122	0.0279399	1	ENSGALG00000000787	DHX38	1.42623
ENSGALG00000007378	3.08915e-06	0.114366	0.22	0.172	0.0280278	1	ENSGALG00000007378	FAM162A	1.27907
ENSGALG00000042796	3.18674e-06	0.104371	0.226	0.179	0.0289133	1	ENSGALG00000042796	DNAJC7	1.26257
ENSGALG00000007470	3.19332e-06	0.111254	0.295	0.235	0.028973	1	ENSGALG00000007470	POLR1D	1.25532
ENSGALG00000030022	3.1955e-06	0.143243	0.246	0.194	0.0289927	1	ENSGALG00000030022	FANCL	1.26804
ENSGALG00000013438	3.20159e-06	0.142875	0.168	0.118	0.029048	1	ENSGALG00000013438	TEX10	1.42373
ENSGALG00000012263	3.21765e-06	0.148891	0.181	0.132	0.0291937	1	ENSGALG00000012263	NEMF	1.37121
ENSGALG00000037258	3.3216e-06	0.111811	0.216	0.167	0.0301369	1	ENSGALG00000037258	MRPL32	1.29341
ENSGALG00000012291	3.33043e-06	0.1466	0.362	0.29	0.030217	1	ENSGALG00000012291	POLR2F	1.24828
ENSGALG00000002605	3.41978e-06	0.121329	0.263	0.213	0.0310276	1	ENSGALG00000002605	MRPL17	1.23474
ENSGALG00000042890	3.57475e-06	0.125292	0.29	0.242	0.0324337	1	ENSGALG00000042890	PIN1	1.19835
ENSGALG00000017627	3.59395e-06	0.166112	0.166	0.114	0.0326079	1	ENSGALG00000017627	TWNK	1.45614
ENSGALG00000008713	3.63357e-06	0.15373	0.414	0.324	0.0329674	1	ENSGALG00000008713	BIRC5	1.27778
ENSGALG00000010570	3.71994e-06	0.0951236	0.473	0.416	0.033751	1	ENSGALG00000010570	BTF3L4	1.13702
ENSGALG00000011038	3.84892e-06	0.108379	0.378	0.322	0.0349212	1	ENSGALG00000011038	CBX3	1.17391
ENSGALG00000028880	4.07446e-06	0.125404	0.209	0.154	0.0369675	1	ENSGALG00000028880	FDPS	1.35714
ENSGALG00000005704	4.12271e-06	0.125667	0.246	0.194	0.0374054	1	ENSGALG00000005704	NDUFB8	1.26804
ENSGALG00000034352	4.54174e-06	0.0566078	0.65	0.601	0.0412072	1	ENSGALG00000034352		1.08153
ENSGALG00000001054	4.61849e-06	0.150705	0.198	0.146	0.0419036	1	ENSGALG00000001054	C20H20ORF24	1.35616
ENSGALG00000035696	4.62983e-06	0.152055	0.178	0.13	0.0420065	1	ENSGALG00000035696	RRP1B	1.36923
ENSGALG00000008454	4.69573e-06	0.121164	0.223	0.17	0.0426044	1	ENSGALG00000008454	NOP58	1.31176
ENSGALG00000011652	5.25135e-06	0.122299	0.274	0.224	0.0476455	1	ENSGALG00000011652	TSN	1.22321

## Sheet: nsCT - Maroon - 2
	p_val	avg_logFC	pct.2	pct.rest	p_val_adj	cluster	gene	name	enrichment
ENSGALG00000035266	1.34123e-64	0.962529	0.233	0.016	1.2169e-60	2	ENSGALG00000035266	ANOS1	14.5625
ENSGALG000000096411	2.1221e-61	0.701073	0.894	0.698	1.92538e-57	2	ENSGALG00000009641	COL1A2	1.2808
ENSGALG000000031931	1.59267e-51	1.014	0.675	0.325	1.44503e-47	2	ENSGALG00000003193	CRABP-I	2.07692
ENSGALG00000007000	2.99216e-51	0.759164	0.306	0.065	2.71478e-47	2	ENSGALG00000007000	NR2F2	4.70769
ENSGALG00000010794	2.74284e-45	0.703227	0.225	0.022	2.48858e-41	2	ENSGALG00000010794	MEOX2	10.2273
ENSGALG00000040297	8.02534e-42	0.768263	0.542	0.245	7.28139e-38	2	ENSGALG00000040297	NBL1	2.21224
ENSGALG00000042077	3.02897e-41	0.65289	0.247	0.047	2.74819e-37	2	ENSGALG00000042077	HIC1	5.25532
ENSGALG000000371641	1.94285e-26	0.592021	0.328	0.117	1.76275e-22	2	ENSGALG00000037164	ZFHX4	2.80342
ENSGALG000000007131	3.93768e-26	0.587476	0.325	0.143	3.57266e-22	2	ENSGALG00000000713	ZFHX3	2.27273
ENSGALG00000036073	3.90556e-25	0.570594	0.592	0.346	3.54352e-21	2	ENSGALG00000036073		1.71098
ENSGALG00000004039	3.39476e-18	0.392276	0.897	0.793	3.08006e-14	2	ENSGALG00000004039	MINOS1	1.13115
ENSGALG00000003767	7.0958e-16	0.471262	0.25	0.119	6.43802e-12	2	ENSGALG00000003767	NKD1	2.10084
ENSGALG00000027835	1.16597e-14	0.478029	0.319	0.167	1.05789e-10	2	ENSGALG00000027835	PCBD1	1.91018
ENSGALG000000025461	1.82383e-14	0.476889	0.375	0.207	1.65476e-10	2	ENSGALG00000002546	COL5A1	1.81159
ENSGALG00000010652	1.88265e-14	0.438345	0.558	0.365	1.70813e-10	2	ENSGALG00000010652	SCP2	1.52877
ENSGALG00000009612	2.59392e-14	0.544203	0.158	0.036	2.35346e-10	2	ENSGALG00000009612	TGFB2	4.38889
ENSGALG000000142611	2.77731e-14	0.462094	0.292	0.163	2.51985e-10	2	ENSGALG00000014261		1.79141
ENSGALG000000119621	3.26025e-14	0.558229	0.303	0.115	2.95802e-10	2	ENSGALG00000011962	NDNF	2.63478
ENSGALG000000043041	3.51132e-13	0.431944	0.564	0.388	3.18582e-09	2	ENSGALG00000004304	TCF12	1.45361
ENSGALG00000008298	3.57772e-12	0.395949	0.228	0.117	3.24606e-08	2	ENSGALG00000008298	LRRC17	1.94872
ENSGALG000000403921	7.7909e-12	0.538142	0.333	0.152	7.06868e-08	2	ENSGALG00000040392	ALC	2.19079
ENSGALG00000002203	8.24971e-12	0.457929	0.178	0.059	7.48496e-08	2	ENSGALG00000002203	FGF-18	3.01695
ENSGALG00000009755	2.03157e-10	0.364659	0.208	0.108	1.84324e-06	2	ENSGALG00000009755	LRIG3	1.92593
ENSGALG000000112741	5.77562e-08	0.331703	0.389	0.239	0.000524022	2	ENSGALG00000011274	DCN	1.62762
ENSGALG00000035996	5.81145e-08	0.248366	0.817	0.741	0.000527273	2	ENSGALG00000035996		1.10256
ENSGALG000000306471	8.55361e-08	0.285215	0.681	0.591	0.000776069	2	ENSGALG00000030647	MFAP2	1.15228
ENSGALG000000275611	5.45939e-07	0.206941	0.925	0.847	0.0049533	2	ENSGALG00000027561	GNG5	1.09209
ENSGALG00000009264	9.83262e-07	0.310987	0.3	0.2	0.00892114	2	ENSGALG00000009264	MTX2	1.5
ENSGALG00000006715	1.80008e-06	0.202748	0.169	0.106	0.0163322	2	ENSGALG00000006715	OAF	1.59434
ENSGALG00000007839	3.28761e-06	0.272173	0.233	0.146	0.0298285	2	ENSGALG00000007839	NCAM1	1.59589
ENSGALG00000016348	4.59151e-06	0.266685	0.164	0.094	0.0416587	2	ENSGALG00000016348	SAT1	1.74468

## Sheet: Blood - Gray - 3
	p_val	avg_logFC	pct.3	pct.rest	p_val_adj	cluster	gene	name	enrichment
ENSGALG000000237402	5.35349e-137	3.16743	0.641	0.204	4.85722e-133	3	ENSGALG00000023740	HBZ	3.14216
ENSGALG000000432341	6.27264e-74	3.12493	0.59	0.114	5.69116e-70	3	ENSGALG00000043234	HBAA	5.17544
ENSGALG000000173472	1.11299e-73	3.71151	0.615	0.167	1.00981e-69	3	ENSGALG00000017347	HBE	3.68263
ENSGALG00000031597	5.77777e-48	2.59981	0.519	0.064	5.24217e-44	3	ENSGALG00000031597	HBAD	8.10938
ENSGALG000000096211	9.08759e-17	0.493465	0.987	0.988	8.24517e-13	3	ENSGALG00000009621	ACTB	0.998988
ENSGALG000000263831	1.0173e-16	0.733588	1	0.97	9.22998e-13	3	ENSGALG00000026383	TMSB4X	1.03093
ENSGALG000000309182	7.12899e-15	0.620431	0.936	0.83	6.46813e-11	3	ENSGALG00000030918	CIRBP	1.12771
ENSGALG000000014752	2.07298e-13	0.52462	0.974	0.954	1.88082e-09	3	ENSGALG00000001475	STMN1	1.02096
ENSGALG00000008435	2.28153e-13	0.69682	0.583	0.368	2.07003e-09	3	ENSGALG00000008435	SUMO1	1.58424
ENSGALG00000008684	1.01283e-12	0.575212	0.744	0.56	9.18943e-09	3	ENSGALG00000008684	EIF4A2	1.32857
ENSGALG00000043768	1.39882e-12	0.487232	0.955	0.938	1.26915e-08	3	ENSGALG00000043768	MT-ND2	1.01812
ENSGALG000000025692	3.56423e-11	0.56812	0.84	0.73	3.23382e-07	3	ENSGALG00000002569	RAN	1.15068
ENSGALG000000370671	4.77574e-11	0.547758	0.718	0.553	4.33303e-07	3	ENSGALG00000037067	EIF3E	1.29837
ENSGALG000000412771	5.55354e-11	0.544056	0.974	0.921	5.03873e-07	3	ENSGALG00000041277	UBC	1.05755
ENSGALG00000016363	7.31855e-11	0.632036	0.474	0.262	6.64012e-07	3	ENSGALG00000016363	ACP1	1.80916
ENSGALG00000036827	1.87034e-10	0.725664	0.314	0.104	1.69696e-06	3	ENSGALG00000036827	UBE2S	3.01923
ENSGALG00000006428	1.44603e-09	0.634791	0.378	0.204	1.31198e-05	3	ENSGALG00000006428	UBE2I	1.85294
ENSGALG000000389331	1.78914e-09	0.699636	0.494	0.272	1.62329e-05	3	ENSGALG00000038933	FABP7	1.81618
ENSGALG000000100231	2.25396e-09	0.552941	0.808	0.689	2.04502e-05	3	ENSGALG00000010023	CALM	1.17271
ENSGALG000000264211	5.01469e-09	0.558532	0.615	0.425	4.54983e-05	3	ENSGALG00000026421	PSMB2	1.44706
ENSGALG00000031960	7.80266e-09	0.479949	0.173	0.063	7.07935e-05	3	ENSGALG00000031960	Lef-1	2.74603
ENSGALG000000166911	9.34203e-09	0.501465	0.808	0.693	8.47602e-05	3	ENSGALG00000016691	SLC25A6	1.16595
ENSGALG000000292922	9.77857e-09	0.459883	0.686	0.578	8.8721e-05	3	ENSGALG00000029292	PCNA	1.18685
ENSGALG00000043733	1.2251e-08	0.496343	0.333	0.179	0.000111153	3	ENSGALG00000043733	TMEM50A	1.86034
ENSGALG00000040016	1.56657e-08	0.540164	0.519	0.329	0.000142135	3	ENSGALG00000040016	PPP1CA	1.57751
ENSGALG000000115141	1.58499e-08	0.594462	0.654	0.456	0.000143806	3	ENSGALG00000011514	SLC25A3	1.43421
ENSGALG000000291402	2.20563e-08	0.5995	0.321	0.172	0.000200117	3	ENSGALG00000029140	CRABP2	1.86628
ENSGALG00000036359	2.49953e-08	0.471402	0.179	0.062	0.000226782	3	ENSGALG00000036359		2.8871
ENSGALG00000017090	3.46292e-08	0.552285	0.513	0.386	0.000314191	3	ENSGALG00000017090	POMP	1.32902
ENSGALG00000007971	4.6468e-08	0.528011	0.808	0.623	0.000421604	3	ENSGALG00000007971	SUMO2	1.29695
ENSGALG000000173841	5.32428e-08	0.554966	0.865	0.774	0.000483072	3	ENSGALG00000017384	ERH	1.11757
ENSGALG00000031983	7.05705e-08	0.553482	0.372	0.197	0.000640286	3	ENSGALG00000031983	MPHOSPH6	1.88832
ENSGALG00000008867	8.02631e-08	0.553058	0.321	0.185	0.000728227	3	ENSGALG00000008867	COMMD5	1.73514
ENSGALG00000042112	1.0766e-07	0.47198	0.288	0.15	0.000976802	3	ENSGALG00000042112	EIF4E	1.92
ENSGALG000000135121	1.2169e-07	0.552886	0.59	0.429	0.00110409	3	ENSGALG00000013512	BTF3	1.37529
ENSGALG00000004693	1.47284e-07	0.53475	0.327	0.165	0.00133631	3	ENSGALG00000004693	ARPC1A	1.98182
ENSGALG00000008667	2.46567e-07	0.463447	0.91	0.813	0.00223711	3	ENSGALG00000008667	DSTN	1.11931
ENSGALG00000043039	2.69816e-07	0.484234	0.647	0.524	0.00244804	3	ENSGALG00000043039	HSBP1	1.23473
ENSGALG000000050012	5.39205e-07	0.480136	0.718	0.561	0.00489221	3	ENSGALG00000005001	CNBP	1.27986
ENSGALG000000371951	8.89232e-07	0.437781	0.462	0.396	0.008068	3	ENSGALG00000037195	TALDO1	1.16667
ENSGALG000000267571	9.11459e-07	0.46647	0.282	0.159	0.00826967	3	ENSGALG00000026757	DHFR	1.77358
ENSGALG00000005622	1.74696e-06	0.537801	0.423	0.289	0.0158501	3	ENSGALG00000005622	ARF5	1.46367
ENSGALG00000004034	2.03852e-06	0.490961	0.385	0.254	0.0184955	3	ENSGALG00000004034	CAPZB	1.51575
ENSGALG000000128211	2.24092e-06	0.497032	0.436	0.302	0.0203319	3	ENSGALG00000012821	TUBB2A	1.44371
ENSGALG00000021679	2.7302e-06	0.403252	0.301	0.198	0.0247711	3	ENSGALG00000021679	SF3A2	1.5202
ENSGALG000000336091	2.83318e-06	0.474509	0.603	0.443	0.0257055	3	ENSGALG00000033609	NACA	1.36117
ENSGALG000000071701	2.83448e-06	0.459247	0.462	0.365	0.0257172	3	ENSGALG00000007170	SNRPA1	1.26575
ENSGALG000000379532	3.58988e-06	0.365569	1	0.978	0.032571	3	ENSGALG00000037953	TUBA1A	1.02249
ENSGALG000000104101	4.64769e-06	0.492303	0.551	0.425	0.0421685	3	ENSGALG00000010410	PFN2	1.29647

## Sheet: Chondrocytes - Blue - 4
	p_val	avg_logFC	pct.4	pct.rest	p_val_adj	cluster	gene	name	enrichment
ENSGALG000000404931	6.10079e-167	1.44844	0.479	0.064	5.53524e-163	4	ENSGALG00000040493	PTN	7.48437
ENSGALG000000027632	5.32288e-155	1.05101	0.5	0.123	4.82945e-151	4	ENSGALG00000002763	FRZB	4.06504
ENSGALG000000355992	1.20059e-124	1.02687	0.531	0.191	1.0893e-120	4	ENSGALG00000035599	CD24	2.7801
ENSGALG000000139481	8.33071e-93	0.870272	0.336	0.077	7.55845e-89	4	ENSGALG00000013948	RASL11B	4.36364
ENSGALG00000015970	2.76934e-90	0.840015	0.206	0.008	2.51262e-86	4	ENSGALG00000015970	COL9A1	25.75
ENSGALG00000004028	7.17537e-75	0.673184	0.191	0.023	6.51022e-71	4	ENSGALG00000004028	MATN4	8.30435
ENSGALG00000005263	8.32537e-65	0.62084	0.216	0.045	7.55361e-61	4	ENSGALG00000005263	SOX8	4.8
ENSGALG000000119622	1.72867e-62	0.843719	0.327	0.091	1.56842e-58	4	ENSGALG00000011962	NDNF	3.59341
ENSGALG000000307121	7.44766e-62	0.70814	0.275	0.086	6.75727e-58	4	ENSGALG00000030712	COL2A1	3.19767
ENSGALG000000156243	1.61614e-53	0.663945	0.45	0.229	1.46632e-49	4	ENSGALG00000015624	VCAN	1.96507
ENSGALG000000151932	2.04777e-51	0.725372	0.458	0.246	1.85794e-47	4	ENSGALG00000015193	CCDC80	1.86179
ENSGALG00000031425	8.36453e-50	0.617916	0.211	0.055	7.58914e-46	4	ENSGALG00000031425	PMP22	3.83636
ENSGALG000000169711	5.16256e-49	0.63097	0.326	0.139	4.68399e-45	4	ENSGALG00000016971	TSC22D1	2.34532
ENSGALG000000086771	1.71514e-48	0.566622	0.716	0.533	1.55614e-44	4	ENSGALG00000008677	VIM	1.34334
ENSGALG00000027526	1.63175e-45	0.576294	0.182	0.042	1.48049e-41	4	ENSGALG00000027526	COL9A2	4.33333
ENSGALG000000157801	3.07222e-45	0.584623	0.703	0.477	2.78742e-41	4	ENSGALG00000015780	PNRC1	1.47379
ENSGALG00000032768	1.34212e-44	0.536241	0.166	0.034	1.2177e-40	4	ENSGALG00000032768	SOX5	4.88235
ENSGALG000000150152	3.21199e-40	0.705015	0.521	0.292	2.91424e-36	4	ENSGALG00000015015	CYTL1	1.78425
ENSGALG000000287492	8.49513e-38	0.45185	0.937	0.849	7.70763e-34	4	ENSGALG00000028749	ACTB ACTC2L	1.10365
ENSGALG000000169451	5.92773e-36	0.579186	0.264	0.111	5.37823e-32	4	ENSGALG00000016945	CNMD	2.37838
ENSGALG000000083672	3.6479e-33	0.687943	0.854	0.677	3.30974e-29	4	ENSGALG00000008367	MDK	1.26145
ENSGALG000000346613	2.92705e-27	0.598692	0.697	0.55	2.65572e-23	4	ENSGALG00000034661	Id1	1.26727
ENSGALG000000035802	1.0363e-25	0.468525	0.231	0.103	9.40234e-22	4	ENSGALG00000003580	MMP2	2.24272
ENSGALG00000010870	3.29269e-22	0.410165	0.193	0.084	2.98746e-18	4	ENSGALG00000010870	JUN	2.29762
ENSGALG000000025462	8.83e-22	0.481028	0.351	0.194	8.01146e-18	4	ENSGALG00000002546	COL5A1	1.80928
ENSGALG000000005422	8.57195e-21	0.40415	0.777	0.67	7.77733e-17	4	ENSGALG00000000542	ZNF593	1.1597
ENSGALG000000176441	8.03946e-20	0.425676	0.349	0.22	7.29421e-16	4	ENSGALG00000017644	COTL1	1.58636
ENSGALG00000010924	2.68088e-19	0.413003	0.197	0.096	2.43236e-15	4	ENSGALG00000010924	cNFI-A	2.05208
ENSGALG00000036263	9.3692e-19	0.399424	0.176	0.081	8.50067e-15	4	ENSGALG00000036263	UBA7	2.17284
ENSGALG000000399851	1.27373e-18	0.437079	0.533	0.384	1.15565e-14	4	ENSGALG00000039985	CDH11	1.38802
ENSGALG000000370672	3.26768e-17	0.369027	0.659	0.54	2.96477e-13	4	ENSGALG00000037067	EIF3E	1.22037
ENSGALG000000405222	3.95687e-17	0.381712	0.68	0.554	3.59007e-13	4	ENSGALG00000040522	EIF3H	1.22744
ENSGALG000000200783	5.17538e-17	0.3744	0.947	0.9	4.69562e-13	4	ENSGALG00000020078	H3F3C	1.05222
ENSGALG000000112761	8.84953e-16	0.404819	0.312	0.179	8.02918e-12	4	ENSGALG00000011276	BTG1	1.74302
ENSGALG000000334711	1.48811e-15	0.367599	0.549	0.402	1.35016e-11	4	ENSGALG00000033471	CALD1	1.36567
ENSGALG000000097551	2.29045e-15	0.352112	0.2	0.099	2.07813e-11	4	ENSGALG00000009755	LRIG3	2.0202
ENSGALG000000323353	4.06487e-15	0.393373	0.28	0.171	3.68806e-11	4	ENSGALG00000032335	MARCKSL1	1.63743
ENSGALG000000169912	4.74045e-15	0.40613	0.359	0.235	4.30101e-11	4	ENSGALG00000016991	ESD	1.52766
ENSGALG00000006808	6.78817e-15	0.33369	0.201	0.111	6.15891e-11	4	ENSGALG00000006808	TSPAN6	1.81081
ENSGALG000000114691	8.87697e-15	0.355851	0.17	0.077	8.05407e-11	4	ENSGALG00000011469	IGFBP2	2.20779
ENSGALG000000151801	2.27047e-14	0.330697	0.185	0.095	2.06e-10	4	ENSGALG00000015180	PSAT1	1.94737
ENSGALG000000344751	3.43406e-14	0.392965	0.619	0.482	3.11572e-10	4	ENSGALG00000034475	EIF3G	1.28423
ENSGALG00000008883	3.48021e-14	0.331763	0.154	0.072	3.15759e-10	4	ENSGALG00000008883	TCF7L2	2.13889
ENSGALG000000293431	4.45488e-13	0.34011	0.797	0.693	4.04191e-09	4	ENSGALG00000029343	EIF3K	1.15007
ENSGALG000000109992	7.04717e-13	0.347041	0.26	0.168	6.3939e-09	4	ENSGALG00000010999	DICER1	1.54762
ENSGALG000000049522	1.46153e-12	0.00364318	1	1	1.32604e-08	4	ENSGALG00000004952	RPL36A	1
ENSGALG000000054411	2.00657e-12	0.357979	0.222	0.137	1.82056e-08	4	ENSGALG00000005441	NFIB	1.62044
ENSGALG000000306472	2.50001e-12	0.352977	0.696	0.58	2.26826e-08	4	ENSGALG00000030647	MFAP2	1.2
ENSGALG000000271422	6.03189e-12	0.0128344	1	1	5.47273e-08	4	ENSGALG00000027142	RPL32	1
ENSGALG000000416211	6.64812e-12	0.326889	0.231	0.15	6.03184e-08	4	ENSGALG00000041621	LY6E	1.54
ENSGALG00000008018	9.48842e-12	0.336114	0.231	0.14	8.60884e-08	4	ENSGALG00000008018	SNAI1	1.65
ENSGALG000000288721	2.48125e-11	0.297875	0.991	0.977	2.25123e-07	4	ENSGALG00000028872	TPT1	1.01433
ENSGALG000000352522	3.07023e-11	0.293165	1	0.991	2.78562e-07	4	ENSGALG00000035252	RPL7	1.00908
ENSGALG000000360991	2.38929e-10	0.278765	0.982	0.959	2.1678e-06	4	ENSGALG00000036099	EEF1D	1.02398
ENSGALG000000141062	2.60841e-10	0.303056	0.216	0.138	2.36661e-06	4	ENSGALG00000014106	PPFIBP1	1.56522
ENSGALG000000057492	3.19195e-10	0.293962	0.862	0.811	2.89605e-06	4	ENSGALG00000005749	COX4I1	1.06289
ENSGALG00000042750	5.34398e-10	0.000916107	0.995	0.997	4.8486e-06	4	ENSGALG00000042750	ND1	0.997994
ENSGALG000000142331	5.52785e-10	0.349881	0.374	0.27	5.01541e-06	4	ENSGALG00000014233	FBLN1	1.38519
ENSGALG000000392381	2.01479e-09	0.262172	0.238	0.159	1.82802e-05	4	ENSGALG00000039238	SALL1	1.49686
ENSGALG000000001503	6.83615e-09	0.255662	1	0.999	6.20244e-05	4	ENSGALG00000000150	RPL9	1.001
ENSGALG000000378382	1.14011e-08	0.245897	1	0.996	0.000103442	4	ENSGALG00000037838	ND6	1.00402
ENSGALG000000294291	1.87462e-08	0.305515	0.238	0.152	0.000170085	4	ENSGALG00000029429	TGFBI	1.56579
ENSGALG000000320791	2.73106e-08	0.0186845	0.999	1	0.000247789	4	ENSGALG00000032079	MT-CYB	0.999
ENSGALG000000026441	3.19868e-08	0.26889	1	0.994	0.000290216	4	ENSGALG00000002644	RPL10A	1.00604
ENSGALG000000353342	7.08176e-08	0.0366953	1	1	0.000642528	4	ENSGALG00000035334	COX3	1
ENSGALG000000303782	9.18015e-08	0.265109	0.999	0.995	0.000832915	4	ENSGALG00000030378	RPL11	1.00402
ENSGALG000000057012	9.29489e-08	0.269226	0.223	0.153	0.000843325	4	ENSGALG00000005701	IP6K2	1.45752
ENSGALG000000101271	1.10946e-07	0.285698	0.463	0.384	0.00100662	4	ENSGALG00000010127	GLO1	1.20573
ENSGALG000000418632	1.14955e-07	0.313049	0.41	0.331	0.00104299	4	ENSGALG00000041863	MRPL13	1.23867
ENSGALG000000121723	1.57857e-07	0.256811	0.992	0.981	0.00143224	4	ENSGALG00000012172	RPL3	1.01121
ENSGALG000000031932	2.39518e-07	0.319247	0.449	0.329	0.00217315	4	ENSGALG00000003193	CRABP-I	1.36474
ENSGALG000000112743	4.64887e-07	0.295537	0.309	0.238	0.00421792	4	ENSGALG00000011274	DCN	1.29832
ENSGALG000000077921	5.31211e-07	0.322141	0.555	0.435	0.00481968	4	ENSGALG00000007792	PFDN4	1.27586
ENSGALG000000144322	1.00336e-06	0.0516159	1	1	0.0091035	4	ENSGALG00000014432	RPS20	1
ENSGALG000000031972	1.11951e-06	0.230128	0.999	0.996	0.0101574	4	ENSGALG00000003197	RPL7A	1.00301
ENSGALG000000355063	1.22636e-06	0.224959	1	0.999	0.0111267	4	ENSGALG00000035506	FAU	1.001
ENSGALG00000026445	1.30086e-06	0.257579	0.776	0.715	0.0118027	4	ENSGALG00000026445	CALM	1.08531
ENSGALG000000302371	1.56532e-06	0.256518	0.238	0.171	0.0142021	4	ENSGALG00000030237	PITX1	1.39181
ENSGALG000000433363	1.92106e-06	0.28224	0.287	0.208	0.0174297	4	ENSGALG00000043336	COPZ1	1.37981
ENSGALG000000336092	3.19072e-06	0.286399	0.519	0.434	0.0289494	4	ENSGALG00000033609	NACA	1.19585
ENSGALG000000154361	4.90315e-06	0.241513	0.418	0.332	0.0444862	4	ENSGALG00000015436	SDCBP	1.25904

## Sheet: Distal - Yellow - 5
	p_val	avg_logFC	pct.5	pct.rest	p_val_adj	cluster	gene	name	enrichment
ENSGALG00000016680	4.52318e-79	1.327	0.513	0.035	4.10388e-75	5	ENSGALG00000016680	TFAP2B	14.6571
ENSGALG000000228193	1.84664e-52	2.23754	0.737	0.15	1.67546e-48	5	ENSGALG00000022819	PCP4	4.91333
ENSGALG00000036189	7.50736e-32	0.960362	0.375	0.05	6.81142e-28	5	ENSGALG00000036189	angiopoietin-2B	7.5
ENSGALG000000072601	3.06468e-31	0.769643	0.48	0.174	2.78059e-27	5	ENSGALG00000007260	ZEB1	2.75862
ENSGALG000000341684	4.64673e-30	0.655368	0.862	0.633	4.21597e-26	5	ENSGALG00000034168	WNT5A	1.36177
ENSGALG00000037310	1.37344e-29	0.756952	0.342	0.053	1.24612e-25	5	ENSGALG00000037310	EVX1	6.45283
ENSGALG00000008193	1.99558e-29	0.717041	0.27	0.035	1.81059e-25	5	ENSGALG00000008193	RELN	7.71429
ENSGALG000000272343	7.13032e-28	0.789561	0.75	0.308	6.46934e-24	5	ENSGALG00000027234	HOXA13	2.43506
ENSGALG00000002242	5.59842e-27	0.535954	0.158	0.014	5.07945e-23	5	ENSGALG00000002242	GALNT9	11.2857
ENSGALG00000009470	2.78046e-22	0.681782	0.27	0.042	2.52271e-18	5	ENSGALG00000009470	SERPINI1	6.42857
ENSGALG00000012775	1.88018e-21	0.638823	0.289	0.047	1.70589e-17	5	ENSGALG00000012775	TFAP2A	6.14894
ENSGALG000000396292	6.19569e-21	0.892964	0.493	0.128	5.62135e-17	5	ENSGALG00000039629	HOXD11	3.85156
ENSGALG00000001124	2.31944e-20	0.666682	0.342	0.09	2.10443e-16	5	ENSGALG00000001124	LHX2	3.8
ENSGALG00000012017	4.00971e-20	0.629057	0.316	0.086	3.63801e-16	5	ENSGALG00000012017	DAAM1	3.67442
ENSGALG00000001434	9.88403e-20	0.534806	0.211	0.03	8.96778e-16	5	ENSGALG00000001434	STOM	7.03333
ENSGALG00000029664	1.76873e-18	0.652898	0.336	0.073	1.60477e-14	5	ENSGALG00000029664	SAMD12	4.60274
ENSGALG00000040993	2.18279e-17	0.519746	0.23	0.042	1.98045e-13	5	ENSGALG00000040993	BAMBI	5.47619
ENSGALG00000037015	2.34794e-17	0.646421	0.276	0.063	2.13028e-13	5	ENSGALG00000037015	DACH1	4.38095
ENSGALG000000357693	2.24129e-16	0.661015	0.48	0.181	2.03352e-12	5	ENSGALG00000035769	EPB41L2	2.65193
ENSGALG00000011000	4.28336e-16	0.471874	0.191	0.042	3.88629e-12	5	ENSGALG00000011000	TARBP1	4.54762
ENSGALG000000150821	9.24196e-16	0.290307	1	0.997	8.38523e-12	5	ENSGALG00000015082	RPS6	1.00301
ENSGALG000000150134	2.00487e-15	0.867704	0.651	0.213	1.81902e-11	5	ENSGALG00000015013	MSX1	3.05634
ENSGALG000000008944	6.55643e-15	0.706606	0.5	0.195	5.94865e-11	5	ENSGALG00000000894	APCDD1	2.5641
ENSGALG00000006379	1.55094e-14	0.710539	0.237	0.016	1.40717e-10	5	ENSGALG00000006379	SHH	14.8125
ENSGALG000000085693	2.09692e-14	0.61229	0.441	0.166	1.90253e-10	5	ENSGALG00000008569	CHP1	2.65663
ENSGALG00000001157	2.31883e-14	0.480858	0.257	0.064	2.10387e-10	5	ENSGALG00000001157	DENND1A	4.01562
ENSGALG00000005346	3.02017e-13	0.494479	0.257	0.076	2.7402e-09	5	ENSGALG00000005346	PPIC	3.38158
ENSGALG000000156173	3.45641e-13	0.206635	1	1	3.136e-09	5	ENSGALG00000015617	RPS23	1
ENSGALG000000279633	9.60225e-13	0.264096	0.98	0.945	8.71212e-09	5	ENSGALG00000027963	COX7C	1.03704
ENSGALG00000038848	2.23605e-12	0.729556	0.375	0.076	2.02876e-08	5	ENSGALG00000038848	MSX2	4.93421
ENSGALG00000006087	5.28067e-12	0.554442	0.276	0.092	4.79115e-08	5	ENSGALG00000006087	GPC3	3
ENSGALG000000320393	5.55996e-12	0.787456	0.697	0.259	5.04455e-08	5	ENSGALG00000032039	HOXD13	2.69112
ENSGALG000000092744	7.89139e-12	0.758216	0.572	0.243	7.15985e-08	5	ENSGALG00000009274	HOXD12	2.35391
ENSGALG00000008072	1.7299e-11	0.567863	0.342	0.114	1.56954e-07	5	ENSGALG00000008072	CHRDL1	3
ENSGALG00000041121	1.93667e-11	0.36997	0.164	0.034	1.75714e-07	5	ENSGALG00000041121	SLIT2	4.82353
ENSGALG000000367742	1.85115e-10	0.222432	1	0.998	1.67955e-06	5	ENSGALG00000036774		1.002
ENSGALG00000041640	2.41072e-10	0.461934	0.289	0.115	2.18725e-06	5	ENSGALG00000041640	TWIST1	2.51304
ENSGALG000000352993	4.35181e-10	0.348948	0.776	0.601	3.94839e-06	5	ENSGALG00000035299	TOMM20	1.29118
ENSGALG000000151951	4.50806e-10	0.102111	1	1	4.09016e-06	5	ENSGALG00000015195	RPS15	1
ENSGALG00000029301	9.88315e-10	0.451009	0.217	0.075	8.96699e-06	5	ENSGALG00000029301	BMP2	2.89333
ENSGALG00000026531	1.22421e-09	0.431766	0.263	0.112	1.11073e-05	5	ENSGALG00000026531	CHST14	2.34821
ENSGALG000000117473	1.80484e-09	0.547277	0.539	0.298	1.63753e-05	5	ENSGALG00000011747	HISTH1	1.80872
ENSGALG000000348111	2.79358e-09	0.123532	1	1	2.53461e-05	5	ENSGALG00000034811	RPLP2	1
ENSGALG00000016558	3.02839e-09	0.412611	0.48	0.235	2.74766e-05	5	ENSGALG00000016558	VEGFD	2.04255
ENSGALG000000097382	3.50228e-09	0.416045	0.474	0.258	3.17762e-05	5	ENSGALG00000009738	CTBP2	1.83721
ENSGALG000000076992	4.36305e-09	0.120544	1	0.999	3.9586e-05	5	ENSGALG00000007699	RPS25	1.001
ENSGALG00000001118	5.53189e-09	0.331573	0.283	0.119	5.01909e-05	5	ENSGALG00000001118	NEK6	2.37815
ENSGALG000000327681	8.08696e-09	0.388926	0.184	0.05	7.3373e-05	5	ENSGALG00000032768	SOX5	3.68
ENSGALG000000048712	9.01574e-09	0.120311	1	0.998	8.17998e-05	5	ENSGALG00000004871	RPS24	1.002
ENSGALG000000148333	1.10382e-08	0.0756882	1	1	0.00010015	5	ENSGALG00000014833	RPL37	1
ENSGALG000000028132	1.2389e-08	0.135833	1	0.99	0.000112405	5	ENSGALG00000002813	RPS10	1.0101
ENSGALG000000045881	1.51488e-08	0.102891	1	0.999	0.000137445	5	ENSGALG00000004588	RPS14	1.001
ENSGALG00000002055	1.87818e-08	0.398168	0.217	0.083	0.000170407	5	ENSGALG00000002055	hairy1	2.61446
ENSGALG000000128343	1.98594e-08	0.509263	0.632	0.412	0.000180184	5	ENSGALG00000012834	AKR1D1	1.53398
ENSGALG000000167751	2.04407e-08	0.0889665	1	0.999	0.000185458	5	ENSGALG00000016775	RPL31	1.001
ENSGALG000000308783	3.59187e-08	0.0856661	1	1	0.00032589	5	ENSGALG00000030878	RPLP1	1
ENSGALG000000300703	4.66557e-08	0.399542	0.401	0.189	0.000423307	5	ENSGALG00000030070	QDPR	2.12169
ENSGALG00000036539	5.46521e-08	0.30436	0.197	0.074	0.000495859	5	ENSGALG00000036539	EFNB1	2.66216
ENSGALG000000049523	7.68074e-08	0.0745387	1	1	0.000696874	5	ENSGALG00000004952	RPL36A	1
ENSGALG00000011207	8.48687e-08	0.240117	0.151	0.05	0.000770014	5	ENSGALG00000011207	DUSP6	3.02
ENSGALG00000033091	8.55342e-08	0.331627	0.191	0.068	0.000776052	5	ENSGALG00000033091	RUNX1T1	2.80882
ENSGALG00000004569	8.90993e-08	0.316426	0.158	0.063	0.000808398	5	ENSGALG00000004569	UNC5B	2.50794
ENSGALG000000437443	9.29695e-08	0.329317	0.645	0.411	0.000843512	5	ENSGALG00000043744	NDFIP1	1.56934
ENSGALG000000269784	1.04118e-07	0.0664829	1	1	0.000944665	5	ENSGALG00000026978	RPL29	1
ENSGALG000000001504	1.0455e-07	0.117875	1	0.999	0.000948581	5	ENSGALG00000000150	RPL9	1.001
ENSGALG000000148041	1.26514e-07	0.408536	0.257	0.128	0.00114786	5	ENSGALG00000014804	THBS4	2.00781
ENSGALG000000101242	1.37365e-07	0.085088	1	1	0.00124631	5	ENSGALG00000010124	RPS8	1
ENSGALG000000096903	1.60021e-07	0.377302	0.487	0.324	0.00145187	5	ENSGALG00000009690	CENPF	1.50309
ENSGALG000000326871	1.75335e-07	0.480874	0.322	0.129	0.00159081	5	ENSGALG00000032687	PHLDA2	2.49612
ENSGALG00000009365	2.08129e-07	0.337336	0.211	0.084	0.00188835	5	ENSGALG00000009365	CYP51	2.5119
ENSGALG00000008403	2.08762e-07	0.315178	0.211	0.093	0.0018941	5	ENSGALG00000008403	PHF21A	2.26882
ENSGALG000000156913	2.91018e-07	0.313538	0.711	0.558	0.00264041	5	ENSGALG00000015691	SMC2	1.27419
ENSGALG000000028682	3.29173e-07	0.0713668	1	1	0.00298658	5	ENSGALG00000002868	RPL26	1
ENSGALG000000016341	3.39537e-07	0.062318	1	1	0.00308062	5	ENSGALG00000001634	RPL23	1
ENSGALG000000021572	4.02298e-07	0.0931077	1	1	0.00365005	5	ENSGALG00000002157	RPS17	1
ENSGALG00000038978	4.36082e-07	0.347145	0.151	0.062	0.00395657	5	ENSGALG00000038978	DPY19L1	2.43548
ENSGALG000000088063	4.37072e-07	0.0979879	1	0.999	0.00396555	5	ENSGALG00000008806	RPL12	1.001
ENSGALG00000007877	4.46834e-07	0.319821	0.243	0.11	0.00405413	5	ENSGALG00000007877	PIP4K2A	2.20909
ENSGALG00000029915	6.72927e-07	0.294719	0.276	0.152	0.00610546	5	ENSGALG00000029915	RBM34	1.81579
ENSGALG000000100233	6.73723e-07	0.218104	0.809	0.689	0.00611269	5	ENSGALG00000010023	CALM	1.17417
ENSGALG000000059482	7.0316e-07	0.0766396	1	0.999	0.00637977	5	ENSGALG00000005948	RPL27A	1.001
ENSGALG00000016329	8.28459e-07	0.358256	0.204	0.093	0.00751661	5	ENSGALG00000016329	AGPAT5	2.19355
ENSGALG000000114721	8.41741e-07	0.0784176	1	1	0.00763712	5	ENSGALG00000011472	RPL37A	1
ENSGALG000000061791	9.48588e-07	0.0883498	1	0.999	0.00860654	5	ENSGALG00000006179	RPL13	1.001
ENSGALG000000007192	1.24308e-06	0.062941	1	0.995	0.0112785	5	ENSGALG00000000719	RPL22	1.00503
ENSGALG000000320021	1.42896e-06	0.0474222	1	1	0.012965	5	ENSGALG00000032002	RPL34	1
ENSGALG000000151322	1.73462e-06	0.334815	0.283	0.145	0.0157382	5	ENSGALG00000015132	CDH2	1.95172
ENSGALG000000428222	1.92717e-06	0.27837	0.467	0.316	0.0174852	5	ENSGALG00000042822	TAX1BP1	1.47785
ENSGALG000000016581	1.99135e-06	0.0771072	1	0.999	0.0180675	5	ENSGALG00000001658	RPL19	1.001
ENSGALG000000131351	2.14077e-06	0.252507	0.283	0.152	0.0194232	5	ENSGALG00000013135	GALNT1	1.86184
ENSGALG000000271423	2.41285e-06	0.0460649	1	1	0.0218918	5	ENSGALG00000027142	RPL32	1
ENSGALG00000005294	2.63603e-06	0.268064	0.257	0.129	0.0239167	5	ENSGALG00000005294	PPFIBP2	1.99225
ENSGALG000000153721	2.93348e-06	0.209183	0.803	0.68	0.0266154	5	ENSGALG00000015372	ATP5I	1.18088
ENSGALG00000040594	3.25022e-06	0.329922	0.237	0.112	0.0294892	5	ENSGALG00000040594	GNPDA1	2.11607
ENSGALG000000362403	3.26572e-06	0.243038	0.618	0.491	0.0296298	5	ENSGALG00000036240	AKAP12	1.25866
ENSGALG000000144323	3.5153e-06	0.0556786	1	1	0.0318943	5	ENSGALG00000014432	RPS20	1
ENSGALG000000359783	3.85685e-06	0.32024	0.401	0.239	0.0349932	5	ENSGALG00000035978	CDCA7L	1.67782
ENSGALG00000005503	3.96473e-06	0.305491	0.171	0.073	0.035972	5	ENSGALG00000005503	WFDC1	2.34247
ENSGALG000000122294	4.03726e-06	0.0408294	1	0.998	0.0366301	5	ENSGALG00000012229	RPS29	1.002
ENSGALG000000077682	4.11597e-06	0.368968	0.322	0.17	0.0373442	5	ENSGALG00000007768	AURKA	1.89412
ENSGALG000000031973	4.71684e-06	0.0897928	1	0.997	0.0427959	5	ENSGALG00000003197	RPL7A	1.00301
ENSGALG00000042416	4.71895e-06	0.286737	0.263	0.118	0.042815	5	ENSGALG00000042416	HOXC11	2.22881
ENSGALG000000298971	5.01313e-06	0.0657629	1	1	0.0454841	5	ENSGALG00000029897	RPL30	1
ENSGALG000000292924	5.46066e-06	0.236369	0.737	0.576	0.0495445	5	ENSGALG00000029292	PCNA	1.27951

## Sheet: Muscle - Black 6
	p_val	avg_logFC	pct.6	pct.rest	p_val_adj	cluster	gene	name	enrichment
ENSGALG00000026276	4.4784e-145	1.52545	0.57	0.012	4.06325e-141	6	ENSGALG00000026276	TCF15	47.5
ENSGALG00000042871	4.44548e-111	1.43685	0.542	0.029	4.03338e-107	6	ENSGALG00000042871	SLIT1	18.6897
ENSGALG00000042492	7.35096e-107	1.88876	0.636	0.002	6.66953e-103	6	ENSGALG00000042492	PITX2	318
ENSGALG00000028543	4.38038e-102	1.14866	0.449	0.008	3.97431e-98	6	ENSGALG00000028543	FGFR4	56.125
ENSGALG00000031211	4.6527e-66	0.966276	0.318	0.003	4.2214e-62	6	ENSGALG00000031211	Lbx3	106
ENSGALG00000010936	1.1046e-65	0.994929	0.308	0.003	1.0022e-61	6	ENSGALG00000010936	MYF6	102.667
ENSGALG000000096121	4.02659e-48	1.42376	0.542	0.034	3.65332e-44	6	ENSGALG00000009612	TGFB2	15.9412
ENSGALG00000000277	1.42662e-47	1.0892	0.327	0.001	1.29437e-43	6	ENSGALG00000000277	GnRH-I	327
ENSGALG00000010316	3.45054e-43	0.964904	0.383	0.026	3.13067e-39	6	ENSGALG00000010316	FRAS1	14.7308
ENSGALG00000012712	3.2044e-39	0.953505	0.196	0.009	2.90735e-35	6	ENSGALG00000012712	RBM24	21.7778
ENSGALG00000011511	1.87163e-38	1.55454	0.57	0.072	1.69813e-34	6	ENSGALG00000011511	CKB	7.91667
ENSGALG00000015419	1.22661e-27	0.747812	0.159	0.006	1.1129e-23	6	ENSGALG00000015419	PENK	26.5
ENSGALG000000122295	3.00829e-22	0.35273	1	0.998	2.72942e-18	6	ENSGALG00000012229	RPS29	1.002
ENSGALG00000043033	3.85615e-20	0.473426	0.159	0.01	3.49868e-16	6	ENSGALG00000043033	EYA1	15.9
ENSGALG00000010614	2.39353e-19	0.624378	0.215	0.028	2.17165e-15	6	ENSGALG00000010614	SLC25A4	7.67857
ENSGALG00000031275	5.37677e-18	0.657067	0.206	0.036	4.87834e-14	6	ENSGALG00000031275	TUBB6	5.72222
ENSGALG00000001191	1.06298e-17	0.580506	0.196	0.016	9.64443e-14	6	ENSGALG00000001191	MEOX1	12.25
ENSGALG00000029439	3.53563e-17	0.804384	0.299	0.038	3.20787e-13	6	ENSGALG00000029439	HOXC9	7.86842
ENSGALG000000293931	6.48327e-17	0.69187	0.383	0.114	5.88227e-13	6	ENSGALG00000029393	HOXC10	3.35965
ENSGALG00000035634	7.51121e-17	0.556856	0.224	0.047	6.81492e-13	6	ENSGALG00000035634	METRN	4.76596
ENSGALG000000150003	5.54029e-16	0.807722	0.589	0.27	5.0267e-12	6	ENSGALG00000015000	LYAR	2.18148
ENSGALG00000008108	3.30473e-15	0.592709	0.598	0.312	2.99839e-11	6	ENSGALG00000008108	PSMC3	1.91667
ENSGALG000000323294	6.55456e-15	0.857009	0.533	0.157	5.94695e-11	6	ENSGALG00000032329	NPM3	3.3949
ENSGALG00000009601	4.37963e-14	0.56139	0.206	0.035	3.97363e-10	6	ENSGALG00000009601	NELL2	5.88571
ENSGALG00000013239	7.28089e-14	0.547851	0.168	0.026	6.60595e-10	6	ENSGALG00000013239	NES	6.46154
ENSGALG00000005426	1.19415e-13	0.425854	0.159	0.024	1.08345e-09	6	ENSGALG00000005426	FREM1	6.625
ENSGALG00000029899	2.16697e-13	0.428341	0.168	0.025	1.96609e-09	6	ENSGALG00000029899	GNG11	6.72
ENSGALG000000093094	2.26256e-13	0.485112	0.916	0.687	2.05282e-09	6	ENSGALG00000009309	EIF5A2	1.33333
ENSGALG000000065124	5.77387e-12	0.431419	0.907	0.83	5.23863e-08	6	ENSGALG00000006512	HSPA8	1.09277
ENSGALG000000301203	2.18929e-11	0.400247	1	0.974	1.98634e-07	6	ENSGALG00000030120	ITGB1BP3	1.02669
ENSGALG00000004357	4.46213e-11	0.433784	0.262	0.109	4.04849e-07	6	ENSGALG00000004357	ANXA6	2.40367
ENSGALG000000048454	5.29013e-11	0.416011	0.757	0.611	4.79973e-07	6	ENSGALG00000004845	TIMM10	1.23895
ENSGALG000000144324	1.94189e-10	0.211476	1	1	1.76187e-06	6	ENSGALG00000014432	RPS20	1
ENSGALG00000009476	4.47754e-10	0.565186	0.449	0.219	4.06247e-06	6	ENSGALG00000009476	CDK6	2.05023
ENSGALG000000275614	7.94551e-10	0.304139	0.944	0.85	7.20896e-06	6	ENSGALG00000027561	GNG5	1.11059
ENSGALG000000139902	1.85829e-09	0.183372	1	1	1.68603e-05	6	ENSGALG00000013990	RPS12	1
ENSGALG000000118853	3.41683e-09	0.479082	0.29	0.12	3.10009e-05	6	ENSGALG00000011885	ANXA5	2.41667
ENSGALG00000021031	4.5103e-09	0.560574	0.178	0.036	4.0922e-05	6	ENSGALG00000021031	ACKR3	4.94444
ENSGALG000000341771	6.06824e-09	0.460926	0.57	0.358	5.50572e-05	6	ENSGALG00000034177	RPS27L	1.59218
ENSGALG000000010963	3.4208e-08	0.344736	0.841	0.729	0.000310369	6	ENSGALG00000001096	UQCR11	1.15364
ENSGALG000000298565	4.06973e-08	0.312653	0.944	0.796	0.000369247	6	ENSGALG00000029856	TOMM7	1.18593
ENSGALG000000083673	5.6243e-08	0.467833	0.925	0.699	0.000510292	6	ENSGALG00000008367	MDK	1.32332
ENSGALG00000003642	5.67018e-08	0.89213	0.327	0.021	0.000514455	6	ENSGALG00000003642	PDGF-A	15.5714
ENSGALG000000260773	5.99649e-08	0.430995	0.72	0.57	0.000544061	6	ENSGALG00000026077	ALDOC	1.26316
ENSGALG000000080943	6.86905e-08	0.442056	0.813	0.654	0.000623229	6	ENSGALG00000008094	HSPD1	1.24312
ENSGALG000000289583	7.379e-08	0.457622	0.467	0.263	0.000669496	6	ENSGALG00000028958	NOL9	1.77567
ENSGALG00000041826	1.25466e-07	0.51648	0.262	0.083	0.00113835	6	ENSGALG00000041826	S100A6	3.15663
ENSGALG000000033552	1.27455e-07	0.512974	0.495	0.266	0.0011564	6	ENSGALG00000003355	NOP16	1.8609
ENSGALG00000010027	1.27944e-07	0.434386	0.28	0.111	0.00116084	6	ENSGALG00000010027	CFL2	2.52252
ENSGALG00000004809	1.9028e-07	0.418806	0.196	0.07	0.00172641	6	ENSGALG00000004809	PPIF	2.8
ENSGALG00000002517	2.15919e-07	0.381642	0.215	0.076	0.00195903	6	ENSGALG00000002517	TMEM35B	2.82895
ENSGALG00000007485	2.39527e-07	0.424689	0.308	0.131	0.00217322	6	ENSGALG00000007485	TFRC	2.35115
ENSGALG000000284094	2.94557e-07	0.238337	0.981	0.939	0.00267251	6	ENSGALG00000028409	SNRPG	1.04473
ENSGALG000000049524	3.28155e-07	0.144797	1	1	0.00297735	6	ENSGALG00000004952	RPL36A	1
ENSGALG000000081873	3.86301e-07	0.42104	0.514	0.326	0.0035049	6	ENSGALG00000008187	EIF3J	1.57669
ENSGALG000000024483	5.67653e-07	0.390398	0.692	0.508	0.00515032	6	ENSGALG00000002448	CCT6	1.3622
ENSGALG000000423093	5.86789e-07	0.230269	0.963	0.91	0.00532394	6	ENSGALG00000042309	CHURC1	1.05824
ENSGALG000000149534	6.3855e-07	0.39042	0.617	0.46	0.00579356	6	ENSGALG00000014953	RWDD1	1.3413
ENSGALG00000039284	7.6718e-07	0.388346	0.374	0.184	0.00696063	6	ENSGALG00000039284	RCN2	2.03261
ENSGALG000000315934	8.02691e-07	0.345585	0.907	0.882	0.00728282	6	ENSGALG00000031593	TMSB15B	1.02834
ENSGALG00000041226	1.20745e-06	0.403528	0.224	0.086	0.0109552	6	ENSGALG00000041226	RRAGA	2.60465
ENSGALG00000009433	1.6447e-06	0.404777	0.262	0.115	0.0149224	6	ENSGALG00000009433	BAG3	2.27826
ENSGALG00000007125	1.89174e-06	0.398989	0.29	0.13	0.0171638	6	ENSGALG00000007125	PARD3	2.23077
ENSGALG000000310313	2.01694e-06	0.387824	0.477	0.278	0.0182997	6	ENSGALG00000031031	C11orf31	1.71583
ENSGALG000000119313	2.16809e-06	0.412934	0.841	0.685	0.0196711	6	ENSGALG00000011931	SNU13	1.22774
ENSGALG000000139163	2.47178e-06	0.366671	0.766	0.596	0.0224265	6	ENSGALG00000013916	HYPK	1.28523
ENSGALG000000363552	2.7801e-06	0.341974	0.682	0.499	0.0252239	6	ENSGALG00000036355	C7orf73	1.36673
ENSGALG000000312383	2.90104e-06	0.331959	0.822	0.722	0.0263211	6	ENSGALG00000031238	SLIRP	1.1385
ENSGALG000000019923	3.01732e-06	0.332095	0.785	0.63	0.0273761	6	ENSGALG00000001992	PKM	1.24603
ENSGALG000000398974	3.52393e-06	0.438188	0.308	0.146	0.0319726	6	ENSGALG00000039897	FBXO22	2.10959
ENSGALG000000088123	3.58361e-06	0.36187	0.738	0.601	0.0325141	6	ENSGALG00000008812	CCT4	1.22795
ENSGALG00000009731	3.73876e-06	0.431072	0.29	0.113	0.0339217	6	ENSGALG00000009731	ARHGAP11A	2.56637
ENSGALG000000170773	4.38819e-06	0.316444	0.299	0.155	0.039814	6	ENSGALG00000017077	HSPH1	1.92903
ENSGALG00000014083	5.01864e-06	0.394145	0.234	0.086	0.0455341	6	ENSGALG00000014083	INTS13	2.72093

## Sheet: AER - Dark purple - 7
	p_val	avg_logFC	pct.7	pct.rest	p_val_adj	cluster	gene	name	enrichment
ENSGALG00000007706	2.46338e-115	3.08428	0.958	0.002	2.23503e-111	7	ENSGALG00000007706	FGF8	479
ENSGALG00000042607	2.26804e-47	1.39815	0.458	0.004	2.05779e-43	7	ENSGALG00000042607	RSPO3	114.5
ENSGALG00000030209	1.49555e-31	1.02007	0.375	0.002	1.35691e-27	7	ENSGALG00000030209	CPZ	187.5
ENSGALG000000372032	2.98498e-28	1.51855	0.958	0.477	2.70827e-24	7	ENSGALG00000037203	CTNNB1	2.00839
ENSGALG000000084372	6.68354e-26	1.66365	0.792	0.176	6.06397e-22	7	ENSGALG00000008437	NET1	4.5
ENSGALG000000326872	3.3446e-23	2.23857	0.833	0.131	3.03456e-19	7	ENSGALG00000032687	PHLDA2	6.35878
ENSGALG00000013183	5.15618e-23	1.27061	0.333	0.007	4.6782e-19	7	ENSGALG00000013183	TERT	47.5714
ENSGALG00000029921	7.8083e-18	1.77874	0.667	0.072	7.08447e-14	7	ENSGALG00000029921	CSRP2	9.26389
ENSGALG00000043290	2.89763e-16	1.34267	0.542	0.089	2.62902e-12	7	ENSGALG00000043290	GNMT	6.08989
ENSGALG00000014687	9.46309e-15	0.883999	0.25	0.002	8.58586e-11	7	ENSGALG00000014687	EPHA1	125
ENSGALG00000009945	1.30175e-14	0.579451	0.208	0.005	1.18107e-10	7	ENSGALG00000009945	CPM	41.6
ENSGALG00000008285	1.87411e-13	1.41882	0.333	0.016	1.70038e-09	7	ENSGALG00000008285	NAPEPLD	20.8125
ENSGALG00000033695	2.81269e-13	0.981062	0.25	0.003	2.55196e-09	7	ENSGALG00000033695	CYP26A1	83.3333
ENSGALG00000038634	3.53956e-13	0.980176	0.25	0.004	3.21144e-09	7	ENSGALG00000038634	KIT	62.5
ENSGALG00000012429	1.04728e-11	1.63413	0.542	0.038	9.50198e-08	7	ENSGALG00000012429	BMP4	14.2632
ENSGALG000000084441	2.94741e-11	1.05561	0.5	0.108	2.67418e-07	7	ENSGALG00000008444	TUBAL3	4.62963
ENSGALG00000000769	4.18205e-11	0.694839	0.167	0.004	3.79438e-07	7	ENSGALG00000000769	RAB7B	41.75
ENSGALG000000112762	5.99166e-11	1.10701	0.667	0.197	5.43623e-07	7	ENSGALG00000011276	BTG1	3.38579
ENSGALG000000275615	1.85287e-10	0.708298	0.958	0.851	1.68111e-06	7	ENSGALG00000027561	GNG5	1.12573
ENSGALG00000028602	2.23515e-10	0.792521	0.167	0.002	2.02795e-06	7	ENSGALG00000028602	HMP19	83.5
ENSGALG00000006702	2.27523e-10	0.845292	0.292	0.029	2.06432e-06	7	ENSGALG00000006702	MFGE8	10.069
ENSGALG000000388481	2.49257e-10	1.72408	0.708	0.081	2.26151e-06	7	ENSGALG00000038848	MSX2	8.74074
ENSGALG00000010198	3.94849e-10	0.565512	0.167	0.003	3.58247e-06	7	ENSGALG00000010198	TPH2	55.6667
ENSGALG00000014582	5.38765e-10	0.633519	0.208	0.011	4.88821e-06	7	ENSGALG00000014582	CADM1	18.9091
ENSGALG000000148334	1.04013e-09	0.501219	1	1	9.43713e-06	7	ENSGALG00000014833	RPL37	1
ENSGALG00000038817	2.65132e-09	0.973381	0.292	0.065	2.40554e-05	7	ENSGALG00000038817	CKS2	4.49231
ENSGALG00000024488	2.73243e-09	1.30373	0.583	0.061	2.47913e-05	7	ENSGALG00000024488	CD99	9.55738
ENSGALG00000002911	3.76172e-09	0.734538	0.167	0.005	3.41301e-05	7	ENSGALG00000002911	MOXD1	33.4
ENSGALG000000100531	1.07815e-08	1.11344	0.5	0.075	9.78209e-05	7	ENSGALG00000010053	PTPRF	6.66667
ENSGALG00000027793	2.19943e-08	0.576945	0.167	0.006	0.000199554	7	ENSGALG00000027793	SCN9A	27.8333
ENSGALG000000079791	2.74266e-08	0.904632	0.292	0.068	0.000248842	7	ENSGALG00000007979	CALML4	4.29412
ENSGALG000000305331	2.80874e-08	1.00708	0.625	0.245	0.000254837	7	ENSGALG00000030533	PGLS	2.55102
ENSGALG00000005914	3.35385e-08	0.991177	0.25	0.061	0.000304295	7	ENSGALG00000005914	WASHC2C	4.09836
ENSGALG00000034649	4.87456e-08	0.683992	0.25	0.034	0.000442269	7	ENSGALG00000034649	TOX3	7.35294
ENSGALG00000016314	8.39492e-08	0.97808	0.458	0.105	0.000761671	7	ENSGALG00000016314	ELOVL5	4.3619
ENSGALG000000287493	1.18659e-07	0.609029	0.875	0.862	0.00107659	7	ENSGALG00000028749	ACTB ACTC2L	1.01508
ENSGALG00000003759	3.73958e-07	0.481065	0.167	0.018	0.00339293	7	ENSGALG00000003759	RORA	9.27778
ENSGALG000000041841	5.19742e-07	0.914464	0.75	0.282	0.00471562	7	ENSGALG00000004184	SPARC	2.65957
ENSGALG00000012365	6.0469e-07	0.796148	0.375	0.075	0.00548636	7	ENSGALG00000012365	PYGL	5
ENSGALG00000009792	6.47769e-07	0.791744	0.167	0.017	0.0058772	7	ENSGALG00000009792		9.82353
ENSGALG00000041927	6.68597e-07	0.821005	0.25	0.028	0.00606618	7	ENSGALG00000041927	FZD9	8.92857
ENSGALG000000298566	8.5398e-07	0.551953	0.875	0.798	0.00774816	7	ENSGALG00000029856	TOMM7	1.09649
ENSGALG00000006409	9.85801e-07	0.932892	0.292	0.04	0.00894417	7	ENSGALG00000006409	PODXL	7.3
ENSGALG00000015546	9.88043e-07	0.565483	0.167	0.016	0.00896452	7	ENSGALG00000015546	TBC1D14	10.4375
ENSGALG00000001376	1.31596e-06	0.713702	0.167	0.014	0.0119397	7	ENSGALG00000001376	ARID3B	11.9286
ENSGALG00000002764	1.34343e-06	0.989439	0.375	0.102	0.0121889	7	ENSGALG00000002764	ATP1B3	3.67647
ENSGALG000000308784	1.75506e-06	0.387198	1	1	0.0159237	7	ENSGALG00000030878	RPLP1	1
ENSGALG000000053461	1.97586e-06	0.996757	0.417	0.079	0.017927	7	ENSGALG00000005346	PPIC	5.27848
ENSGALG000000148734	2.58573e-06	0.795475	0.792	0.413	0.0234603	7	ENSGALG00000014873	GJA1	1.91768
ENSGALG00000012131	2.75892e-06	0.82533	0.375	0.08	0.0250317	7	ENSGALG00000012131	ELOVL6	4.6875
ENSGALG00000010448	2.86652e-06	0.68264	0.292	0.038	0.0260079	7	ENSGALG00000010448	LTBP1	7.68421
ENSGALG00000009604	3.21074e-06	0.752002	0.167	0.015	0.029131	7	ENSGALG00000009604	DBX2	11.1333
ENSGALG00000039028	3.31236e-06	0.700855	0.292	0.02	0.030053	7	ENSGALG00000039028	ECM1	14.6
ENSGALG000000352392	4.65803e-06	0.881716	0.375	0.192	0.0422623	7	ENSGALG00000035239	GLCCI1	1.95312
ENSGALG000000059221	5.19233e-06	0.565443	1	0.938	0.0471101	7	ENSGALG00000005922	RPL5	1.0661
ENSGALG000000139903	5.30936e-06	0.402509	1	1	0.0481718	7	ENSGALG00000013990	RPS12	1
ENSGALG000000026062	5.42568e-06	0.777242	0.542	0.216	0.0492272	7	ENSGALG00000002606	CLSTN1	2.50926

## Sheet: Skin- Purple - 8
	p_val	avg_logFC	pct.8	pct.rest	p_val_adj	cluster	gene	name	enrichment
ENSGALG00000006346	0	2.85039	0.876	0.031	0	8	ENSGALG00000006346	CXCL14	28.2581
ENSGALG000000278915	0	1.92557	0.899	0.311	0	8	ENSGALG00000027891	NREP	2.89068
ENSGALG000000367111	1.76816e-247	1.89353	0.752	0.045	1.60425e-243	8	ENSGALG00000036711	S100A11	16.7111
ENSGALG000000037701	7.56591e-224	1.77463	0.661	0.018	6.86455e-220	8	ENSGALG00000003770	ANXA2	36.7222
ENSGALG000000162891	7.91093e-220	1.63897	0.633	0.032	7.17759e-216	8	ENSGALG00000016289	DST	19.7812
ENSGALG000000113581	1.00263e-181	1.6946	0.569	0.006	9.09685e-178	8	ENSGALG00000011358	WNT6	94.8333
ENSGALG000000035784	5.53206e-167	1.91776	0.908	0.188	5.01924e-163	8	ENSGALG00000003578	FN1	4.82979
ENSGALG00000019719	2.84173e-165	1.51844	0.505	0.038	2.5783e-161	8	ENSGALG00000019719	KRT19	13.2895
ENSGALG000000284513	5.38466e-162	1.5467	0.693	0.125	4.88551e-158	8	ENSGALG00000028451	MT4L	5.544
ENSGALG00000008969	4.63989e-145	1.39832	0.495	0.006	4.20977e-141	8	ENSGALG00000008969	EPCAM	82.5
ENSGALG00000009495	2.49795e-142	1.19956	0.459	0.027	2.26639e-138	8	ENSGALG00000009495	FGFR2	17
ENSGALG000000036421	1.31368e-141	1.36724	0.468	0.01	1.1919e-137	8	ENSGALG00000003642	PDGF-A	46.8
ENSGALG000000268621	1.60924e-137	1.46418	0.495	0.004	1.46006e-133	8	ENSGALG00000026862	CLDN1	123.75
ENSGALG000000006081	4.36561e-132	1.19733	0.417	0.017	3.96091e-128	8	ENSGALG00000000608	CDH3	24.5294
ENSGALG00000027240	6.31392e-115	1.06359	0.417	0.04	5.72862e-111	8	ENSGALG00000027240	TSPAN13	10.425
ENSGALG00000013342	1.97971e-110	1.0679	0.372	0.027	1.79619e-106	8	ENSGALG00000013342	GBX2	13.7778
ENSGALG000000035702	1.71386e-104	1.02818	0.812	0.401	1.55499e-100	8	ENSGALG00000003570	ATIC	2.02494
ENSGALG00000006563	2.9598e-92	1.07117	0.367	0.004	2.68543e-88	8	ENSGALG00000006563	SEMA3D	91.75
ENSGALG00000038688	3.40982e-86	0.851566	0.28	0.011	3.09373e-82	8	ENSGALG00000038688	ADAMTS17	25.4545
ENSGALG000000083674	9.22958e-82	1.16921	0.986	0.692	8.374e-78	8	ENSGALG00000008367	MDK	1.42486
ENSGALG000000100532	9.46383e-82	0.98424	0.454	0.062	8.58653e-78	8	ENSGALG00000010053	PTPRF	7.32258
ENSGALG000000091291	6.89244e-79	1.18102	0.463	0.038	6.25351e-75	8	ENSGALG00000009129	DLX5	12.1842
ENSGALG000000127901	4.92292e-76	0.77713	0.257	0.01	4.46656e-72	8	ENSGALG00000012790	DSP	25.7
ENSGALG00000040167	9.68013e-73	0.916109	0.44	0.108	8.78278e-69	8	ENSGALG00000040167	RP11-26J3.4	4.07407
ENSGALG00000016415	2.68972e-72	0.757381	0.252	0.006	2.44038e-68	8	ENSGALG00000016415	MAP7D2	42
ENSGALG00000037675	4.10953e-70	1.08128	0.349	0.002	3.72858e-66	8	ENSGALG00000037675	COL14A1	174.5
ENSGALG000000041842	8.60481e-69	0.864459	0.67	0.269	7.80714e-65	8	ENSGALG00000004184	SPARC	2.49071
ENSGALG000000296171	1.24371e-68	0.840242	0.266	0.003	1.12842e-64	8	ENSGALG00000029617	COL17A1	88.6667
ENSGALG00000037050	2.24376e-68	0.880852	0.275	0.011	2.03577e-64	8	ENSGALG00000037050	FABP3	25
ENSGALG000000308785	2.83298e-68	0.445415	1	1	2.57036e-64	8	ENSGALG00000030878	RPLP1	1
ENSGALG00000026754	5.74916e-64	0.682914	0.243	0.003	5.21622e-60	8	ENSGALG00000026754	Keratin	81
ENSGALG000000315935	9.20917e-63	0.71632	0.963	0.879	8.35548e-59	8	ENSGALG00000031593	TMSB15B	1.09556
ENSGALG000000033741	1.69594e-61	0.648081	0.211	0.006	1.53872e-57	8	ENSGALG00000003374	ESRP2	35.1667
ENSGALG00000013640	2.78504e-60	0.579927	0.206	0.006	2.52686e-56	8	ENSGALG00000013640	MBP	34.3333
ENSGALG000000148335	7.63763e-60	0.370075	1	1	6.92962e-56	8	ENSGALG00000014833	RPL37	1
ENSGALG00000036836	2.26955e-56	0.629352	0.211	0.003	2.05917e-52	8	ENSGALG00000036836	SOSTDC1	70.3333
ENSGALG000000403163	4.83574e-52	0.906654	0.564	0.213	4.38747e-48	8	ENSGALG00000040316	GPC1	2.64789
ENSGALG00000014616	3.63651e-49	0.628539	0.22	0.02	3.29941e-45	8	ENSGALG00000014616	MT1 MT3	11
ENSGALG000000357251	1.41835e-46	0.717275	0.211	0.001	1.28687e-42	8	ENSGALG00000035725	SP8	211
ENSGALG00000001405	2.31337e-44	0.761768	0.225	0.001	2.09892e-40	8	ENSGALG00000001405	IRF6	225
ENSGALG00000005619	4.84577e-44	0.511984	0.151	0.003	4.39656e-40	8	ENSGALG00000005619	F3	50.3333
ENSGALG00000034868	6.44738e-44	0.731656	0.165	0.003	5.84971e-40	8	ENSGALG00000034868	otokeratin	55
ENSGALG00000042454	5.78316e-43	0.592817	0.17	0.002	5.24706e-39	8	ENSGALG00000042454	DCDC2	85
ENSGALG00000021271	9.42867e-41	0.486713	0.183	0.016	8.55463e-37	8	ENSGALG00000021271	MPZL3	11.4375
ENSGALG00000030002	1.19719e-40	0.634376	0.179	0.02	1.08621e-36	8	ENSGALG00000030002	KRT18	8.95
ENSGALG00000015348	1.77164e-40	0.558232	0.165	0.013	1.60741e-36	8	ENSGALG00000015348	ALCAM	12.6923
ENSGALG00000012561	3.23752e-37	0.650772	0.326	0.08	2.9374e-33	8	ENSGALG00000012561	PKP4	4.075
ENSGALG000000244881	5.93462e-37	0.665491	0.294	0.054	5.38448e-33	8	ENSGALG00000024488	CD99	5.44444
ENSGALG00000009302	2.90463e-36	0.523889	0.179	0.001	2.63538e-32	8	ENSGALG00000009302	EMX2	179
ENSGALG00000006008	1.24607e-35	0.729268	0.344	0.094	1.13056e-31	8	ENSGALG00000006008	HOMER2	3.65957
ENSGALG00000043092	1.37494e-35	0.598906	0.381	0.112	1.24748e-31	8	ENSGALG00000043092	MYH9	3.40179
ENSGALG00000022557	8.46393e-35	0.642776	0.193	0.001	7.67932e-31	8	ENSGALG00000022557	CLDN3	193
ENSGALG00000027058	3.17052e-34	0.495863	0.197	0.027	2.87662e-30	8	ENSGALG00000027058	EMP2	7.2963
ENSGALG000000139904	9.07229e-34	0.296141	1	1	8.23129e-30	8	ENSGALG00000013990	RPS12	1
ENSGALG000000294392	1.26338e-33	0.685717	0.252	0.035	1.14626e-29	8	ENSGALG00000029439	HOXC9	7.2
ENSGALG000000049561	1.06221e-32	0.669587	0.431	0.164	9.63742e-29	8	ENSGALG00000004956	GPI	2.62805
ENSGALG00000039118	3.97218e-32	0.552245	0.183	0.014	3.60396e-28	8	ENSGALG00000039118	Meis2a.1	13.0714
ENSGALG000000287494	1.20014e-31	0.455853	0.959	0.859	1.08889e-27	8	ENSGALG00000028749	ACTB ACTC2L	1.11641
ENSGALG000000114693	7.76156e-30	0.551774	0.307	0.083	7.04207e-26	8	ENSGALG00000011469	IGFBP2	3.6988
ENSGALG00000032997	1.97167e-29	0.530041	0.216	0.034	1.7889e-25	8	ENSGALG00000032997	EMILIN2	6.35294
ENSGALG000000112763	5.54523e-29	0.606157	0.445	0.189	5.03119e-25	8	ENSGALG00000011276	BTG1	2.3545
ENSGALG000000072202	2.03937e-27	0.356775	0.991	0.967	1.85032e-23	8	ENSGALG00000007220	FTH1	1.02482
ENSGALG000000374413	2.12081e-27	0.285139	1	0.997	1.92421e-23	8	ENSGALG00000037441	RPS27	1.00301
ENSGALG000000112381	3.7601e-27	0.592826	0.468	0.208	3.41154e-23	8	ENSGALG00000011238	WLS	2.25
ENSGALG00000037093	5.81365e-26	0.491671	0.243	0.059	5.27473e-22	8	ENSGALG00000037093		4.11864
ENSGALG000000263834	4.87585e-25	0.439182	0.986	0.971	4.42386e-21	8	ENSGALG00000026383	TMSB4X	1.01545
ENSGALG00000011252	1.28924e-24	0.503718	0.216	0.053	1.16973e-20	8	ENSGALG00000011252	RACGAP1L	4.07547
ENSGALG000000035212	1.69029e-24	0.543065	0.454	0.224	1.5336e-20	8	ENSGALG00000003521	TPM1	2.02679
ENSGALG000000051711	3.93186e-24	0.46754	0.174	0.027	3.56738e-20	8	ENSGALG00000005171	AP1S3	6.44444
ENSGALG000000115112	2.09449e-23	0.812622	0.326	0.071	1.90033e-19	8	ENSGALG00000011511	CKB	4.59155
ENSGALG000000122297	2.59046e-23	0.25518	1	0.998	2.35032e-19	8	ENSGALG00000012229	RPS29	1.002
ENSGALG000000019924	8.91313e-23	0.480438	0.789	0.627	8.08688e-19	8	ENSGALG00000001992	PKM	1.25837
ENSGALG000000378385	1.94196e-22	0.245384	1	0.997	1.76194e-18	8	ENSGALG00000037838	ND6	1.00301
ENSGALG000000320023	1.00094e-21	0.218751	1	1	9.08155e-18	8	ENSGALG00000032002	RPL34	1
ENSGALG000000382901	1.4034e-21	0.461129	0.472	0.261	1.27331e-17	8	ENSGALG00000038290	P4HB	1.80843
ENSGALG000000036012	1.40898e-21	0.48169	0.312	0.111	1.27837e-17	8	ENSGALG00000003601	ATP2B4	2.81081
ENSGALG000000386353	1.99593e-21	0.478309	0.431	0.195	1.81091e-17	8	ENSGALG00000038635	MYL12B	2.21026
ENSGALG00000038536	2.53509e-21	0.509615	0.303	0.106	2.30008e-17	8	ENSGALG00000038536	SH3BGRL3	2.85849
ENSGALG000000028684	5.47702e-21	0.20374	1	1	4.9693e-17	8	ENSGALG00000002868	RPL26	1
ENSGALG000000419143	9.45138e-21	0.495575	0.413	0.203	8.57524e-17	8	ENSGALG00000041914	Brain protein I4	2.03448
ENSGALG000000436901	1.23876e-20	0.498256	0.248	0.084	1.12392e-16	8	ENSGALG00000043690	C2orf40	2.95238
ENSGALG000000288724	1.48057e-20	0.280889	1	0.978	1.34332e-16	8	ENSGALG00000028872	TPT1	1.02249
ENSGALG000000025464	3.18838e-19	0.489927	0.486	0.207	2.89282e-15	8	ENSGALG00000002546	COL5A1	2.34783
ENSGALG000000045311	3.18863e-19	0.53916	0.362	0.153	2.89305e-15	8	ENSGALG00000004531	PLOD1	2.36601
ENSGALG00000038089	3.71158e-19	0.474731	0.193	0.046	3.36752e-15	8	ENSGALG00000038089	EGFR	4.19565
ENSGALG00000015109	4.37223e-19	0.46011	0.161	0.031	3.96692e-15	8	ENSGALG00000015109	TJP2	5.19355
ENSGALG00000009015	6.58483e-19	0.453227	0.211	0.071	5.97441e-15	8	ENSGALG00000009015	PIGK	2.97183
ENSGALG00000006856	6.9624e-19	0.448369	0.165	0.034	6.31698e-15	8	ENSGALG00000006856	CD151	4.85294
ENSGALG000000285201	1.18763e-18	0.424457	0.587	0.418	1.07754e-14	8	ENSGALG00000028520	CST3	1.40431
ENSGALG000000298973	2.13474e-18	0.224997	1	1	1.93685e-14	8	ENSGALG00000029897	RPL30	1
ENSGALG000000004745	1.62459e-17	0.208656	1	0.999	1.47399e-13	8	ENSGALG00000000474	RPL36	1.001
ENSGALG00000003733	3.42515e-17	0.409379	0.156	0.04	3.10764e-13	8	ENSGALG00000003733	LIFR	3.9
ENSGALG000000363554	4.34253e-17	0.38221	0.638	0.497	3.93998e-13	8	ENSGALG00000036355	C7orf73	1.2837
ENSGALG00000008827	4.48088e-17	0.359707	0.174	0.039	4.0655e-13	8	ENSGALG00000008827	FERMT1	4.46154
ENSGALG00000021231	1.37201e-16	0.334499	0.161	0.034	1.24483e-12	8	ENSGALG00000021231	TMEM254	4.73529
ENSGALG000000282042	1.75765e-16	0.313999	0.881	0.839	1.59471e-12	8	ENSGALG00000028204	GPX1	1.05006
ENSGALG000000053386	2.14306e-16	0.182116	1	1	1.9444e-12	8	ENSGALG00000005338	RPS21	1
ENSGALG00000034898	2.65191e-16	0.395131	0.161	0.036	2.40608e-12	8	ENSGALG00000034898	ITPK1	4.47222
ENSGALG000000001506	8.86431e-16	0.175361	1	0.999	8.04259e-12	8	ENSGALG00000000150	RPL9	1.001
ENSGALG00000013002	1.16293e-15	0.378333	0.266	0.11	1.05513e-11	8	ENSGALG00000013002	DAP1	2.41818
ENSGALG000000172993	1.51002e-15	0.182879	1	1	1.37004e-11	8	ENSGALG00000017299	cRPS11	1
ENSGALG000000275616	1.62021e-15	0.265651	0.927	0.849	1.47001e-11	8	ENSGALG00000027561	GNG5	1.09187
ENSGALG00000017414	1.71126e-15	0.423201	0.239	0.088	1.55262e-11	8	ENSGALG00000017414	JUP	2.71591
ENSGALG000000069472	2.11213e-15	0.533343	0.381	0.171	1.91633e-11	8	ENSGALG00000006947	BDH1	2.22807
ENSGALG000000109861	3.51471e-15	0.376696	0.156	0.028	3.1889e-11	8	ENSGALG00000010986	GNG4	5.57143
ENSGALG000000269786	3.5278e-15	0.169552	1	1	3.20077e-11	8	ENSGALG00000026978	RPL29	1
ENSGALG000000420001	6.37237e-15	0.344848	0.188	0.075	5.78165e-11	8	ENSGALG00000042000	C18orf32	2.50667
ENSGALG00000015480	9.00201e-15	0.440172	0.243	0.1	8.16752e-11	8	ENSGALG00000015480	POGLUT1	2.43
ENSGALG000000067715	1.48482e-14	0.155603	1	1	1.34717e-10	8	ENSGALG00000006771	RPS15A	1
ENSGALG000000041071	1.68501e-14	0.392581	0.385	0.207	1.52881e-10	8	ENSGALG00000004107	ITM2A	1.8599
ENSGALG000000286851	1.93876e-14	0.432064	0.298	0.132	1.75904e-10	8	ENSGALG00000028685	SEMA5A	2.25758
ENSGALG000000169961	2.96571e-14	0.425418	0.298	0.131	2.69079e-10	8	ENSGALG00000016996	ITM2B	2.27481
ENSGALG000000407931	3.4102e-14	0.460016	0.417	0.218	3.09407e-10	8	ENSGALG00000040793	KDELR2	1.91284
ENSGALG00000029766	3.9345e-14	0.408953	0.229	0.081	3.56978e-10	8	ENSGALG00000029766	ITGB5	2.82716
ENSGALG000000156175	7.54044e-14	0.156633	1	1	6.84144e-10	8	ENSGALG00000015617	RPS23	1
ENSGALG000000021574	1.74864e-13	0.145201	1	1	1.58654e-09	8	ENSGALG00000002157	RPS17	1
ENSGALG000000348113	1.77615e-13	0.155493	1	1	1.6115e-09	8	ENSGALG00000034811	RPLP2	1
ENSGALG00000021636	2.28563e-13	0.348824	0.216	0.078	2.07375e-09	8	ENSGALG00000021636	CUX1	2.76923
ENSGALG00000028567	4.14945e-13	0.293393	0.266	0.12	3.7648e-09	8	ENSGALG00000028567	MYL9	2.21667
ENSGALG000000159174	4.65879e-13	0.142102	1	1	4.22692e-09	8	ENSGALG00000015917	EEF1A1	1
ENSGALG00000012186	9.53175e-13	0.412188	0.193	0.079	8.64816e-09	8	ENSGALG00000012186	CASP6	2.44304
ENSGALG000000162322	1.35773e-12	0.180459	0.995	0.995	1.23187e-08	8	ENSGALG00000016232	RPL8	1
ENSGALG00000010493	1.41383e-12	0.404111	0.202	0.069	1.28277e-08	8	ENSGALG00000010493	INPP5A	2.92754
ENSGALG000000100234	1.58126e-12	0.265353	0.729	0.691	1.43468e-08	8	ENSGALG00000010023	CALM	1.05499
ENSGALG00000011715	1.99803e-12	0.368235	0.202	0.069	1.81281e-08	8	ENSGALG00000011715	HSPA2	2.92754
ENSGALG000000305332	2.66377e-12	0.358276	0.417	0.24	2.41684e-08	8	ENSGALG00000030533	PGLS	1.7375
ENSGALG00000027950	2.81352e-12	0.40596	0.486	0.316	2.55271e-08	8	ENSGALG00000027950	TXNDC17	1.53797
ENSGALG000000029903	2.95754e-12	0.290247	0.867	0.772	2.68338e-08	8	ENSGALG00000002990	PRELID1	1.12306
ENSGALG00000006594	4.36204e-12	0.395936	0.225	0.09	3.95768e-08	8	ENSGALG00000006594	POFUT1	2.5
ENSGALG000000059484	5.51196e-12	0.134859	0.995	0.999	5.001e-08	8	ENSGALG00000005948	RPL27A	0.995996
ENSGALG000000101244	9.53023e-12	0.128807	1	1	8.64678e-08	8	ENSGALG00000010124	RPS8	1
ENSGALG000000028133	1.01893e-11	0.150912	0.991	0.99	9.24472e-08	8	ENSGALG00000002813	RPS10	1.00101
ENSGALG000000073311	3.02982e-11	0.439488	0.243	0.081	2.74896e-07	8	ENSGALG00000007331	SVIL	3
ENSGALG00000042458	3.80615e-11	0.350345	0.225	0.094	3.45332e-07	8	ENSGALG00000042458	ACTN1	2.39362
ENSGALG000000276822	4.28268e-11	0.144974	1	0.998	3.88568e-07	8	ENSGALG00000027682	C12orf66	1.002
ENSGALG000000156245	4.58131e-11	0.338199	0.431	0.255	4.15662e-07	8	ENSGALG00000015624	VCAN	1.6902
ENSGALG000000031976	6.88496e-11	0.140469	0.995	0.997	6.24672e-07	8	ENSGALG00000003197	RPL7A	0.997994
ENSGALG000000150823	7.20292e-11	0.144325	1	0.997	6.53521e-07	8	ENSGALG00000015082	RPS6	1.00301
ENSGALG000000061793	8.46785e-11	0.148507	1	0.999	7.68288e-07	8	ENSGALG00000006179	RPL13	1.001
ENSGALG00000010798	1.0735e-10	0.347475	0.156	0.046	9.73986e-07	8	ENSGALG00000010798	DHCR24	3.3913
ENSGALG00000012159	1.5193e-10	0.338811	0.399	0.231	1.37846e-06	8	ENSGALG00000012159	ACTR3	1.72727
ENSGALG000000076994	1.65408e-10	0.137985	1	0.999	1.50075e-06	8	ENSGALG00000007699	RPS25	1.001
ENSGALG000000149811	3.40781e-10	0.301695	0.482	0.306	3.09191e-06	8	ENSGALG00000014981	COX17	1.57516
ENSGALG000000007193	3.82967e-10	0.137171	1	0.995	3.47466e-06	8	ENSGALG00000000719	RPL22	1.00503
ENSGALG000000271731	4.86158e-10	0.324379	0.161	0.06	4.41091e-06	8	ENSGALG00000027173	TMEM159	2.68333
ENSGALG000000013282	5.81544e-10	0.320791	0.518	0.336	5.27635e-06	8	ENSGALG00000001328	BSG	1.54167
ENSGALG000000355066	7.26734e-10	0.120376	1	0.999	6.59366e-06	8	ENSGALG00000035506	FAU	1.001
ENSGALG000000026063	7.45466e-10	0.325304	0.362	0.212	6.76361e-06	8	ENSGALG00000002606	CLSTN1	1.70755
ENSGALG000000298567	8.52613e-10	0.227862	0.904	0.794	7.73576e-06	8	ENSGALG00000029856	TOMM7	1.13854
ENSGALG000000127751	1.03832e-09	0.336952	0.156	0.049	9.42069e-06	8	ENSGALG00000012775	TFAP2A	3.18367
ENSGALG000000271424	1.08176e-09	0.09516	1	1	9.81485e-06	8	ENSGALG00000027142	RPL32	1
ENSGALG00000007438	1.51382e-09	0.286689	0.161	0.061	1.37349e-05	8	ENSGALG00000007438	IFT46	2.63934
ENSGALG000000367871	1.96774e-09	0.383273	0.284	0.143	1.78533e-05	8	ENSGALG00000036787	HSD17B12	1.98601
ENSGALG00000010158	2.41204e-09	0.390991	0.183	0.077	2.18844e-05	8	ENSGALG00000010158	KANK1	2.37662
ENSGALG000000367743	2.45902e-09	0.119306	1	0.998	2.23106e-05	8	ENSGALG00000036774		1.002
ENSGALG00000032247	2.8254e-09	0.312912	0.252	0.135	2.56348e-05	8	ENSGALG00000032247	ATP1A1	1.86667
ENSGALG000000005423	3.71326e-09	0.227908	0.794	0.681	3.36904e-05	8	ENSGALG00000000542	ZNF593	1.16593
ENSGALG000000084373	4.19793e-09	0.356985	0.307	0.173	3.80878e-05	8	ENSGALG00000008437	NET1	1.77457
ENSGALG00000014846	4.82028e-09	0.334434	0.22	0.095	4.37344e-05	8	ENSGALG00000014846	OXCT1	2.31579
ENSGALG000000352973	6.22125e-09	0.235513	0.349	0.218	5.64454e-05	8	ENSGALG00000035297	GABARAP	1.60092
ENSGALG000000014753	6.26777e-09	0.155163	0.982	0.954	5.68675e-05	8	ENSGALG00000001475	STMN1	1.02935
ENSGALG000000029882	7.12953e-09	0.358181	0.33	0.184	6.46863e-05	8	ENSGALG00000002988	PHGDH	1.79348
ENSGALG000000141063	7.58875e-09	0.320603	0.266	0.145	6.88527e-05	8	ENSGALG00000014106	PPFIBP1	1.83448
ENSGALG00000010809	7.78505e-09	0.251512	0.583	0.434	7.06337e-05	8	ENSGALG00000010809	BZW2	1.34332
ENSGALG00000006080	8.90269e-09	0.288526	0.165	0.067	8.07741e-05	8	ENSGALG00000006080	GPC4	2.46269
ENSGALG00000039114	1.00213e-08	0.309749	0.248	0.116	9.09235e-05	8	ENSGALG00000039114	TMEM256	2.13793
ENSGALG000000151952	1.01767e-08	0.0907518	1	1	9.23336e-05	8	ENSGALG00000015195	RPS15	1
ENSGALG00000005475	1.10372e-08	0.235372	0.151	0.061	0.000100141	8	ENSGALG00000005475		2.47541
ENSGALG000000001224	1.19031e-08	0.118174	1	0.988	0.000107996	8	ENSGALG00000000122	GNB2L1	1.01215
ENSGALG000000076592	1.93422e-08	0.296521	0.394	0.251	0.000175491	8	ENSGALG00000007659	HYOU1	1.56972
ENSGALG000000377144	1.94476e-08	0.276294	0.555	0.397	0.000176448	8	ENSGALG00000037714	BBIP1	1.39798
ENSGALG000000112746	2.18506e-08	0.341658	0.385	0.243	0.000198251	8	ENSGALG00000011274	DCN	1.58436
ENSGALG000000372033	2.55956e-08	0.209807	0.606	0.474	0.000232229	8	ENSGALG00000037203	CTNNB1	1.27848
ENSGALG000000049711	2.57391e-08	0.258977	0.67	0.55	0.00023353	8	ENSGALG00000004971	URM1	1.21818
ENSGALG000000427502	2.98219e-08	0.0619836	0.991	0.997	0.000270574	8	ENSGALG00000042750	ND1	0.993982
ENSGALG000000345091	3.22703e-08	0.31724	0.472	0.316	0.000292789	8	ENSGALG00000034509	DYNLRB1	1.49367
ENSGALG000000049525	3.84159e-08	0.101378	1	1	0.000348548	8	ENSGALG00000004952	RPL36A	1
ENSGALG000000071451	4.83501e-08	0.328225	0.39	0.23	0.000438681	8	ENSGALG00000007145	ITGB1	1.69565
ENSGALG00000031519	5.138e-08	0.313837	0.202	0.096	0.000466171	8	ENSGALG00000031519	KHDRBS3	2.10417
ENSGALG000000163923	5.5399e-08	0.0975401	1	0.986	0.000502635	8	ENSGALG00000016392	RPS7	1.0142
ENSGALG000000039662	6.25115e-08	0.109206	1	1	0.000567167	8	ENSGALG00000003966	RPL23A	1
ENSGALG00000043373	8.2647e-08	0.284695	0.161	0.06	0.000749856	8	ENSGALG00000043373	ARVCF	2.68333
ENSGALG000000114722	9.04913e-08	0.111692	1	1	0.000821027	8	ENSGALG00000011472	RPL37A	1
ENSGALG00000000059	1.22868e-07	0.34283	0.202	0.086	0.00111478	8	ENSGALG00000000059	Tubulin beta chain	2.34884
ENSGALG000000144325	1.35154e-07	0.0977423	1	1	0.00122625	8	ENSGALG00000014432	RPS20	1
ENSGALG000000063501	1.39381e-07	0.354616	0.28	0.136	0.0012646	8	ENSGALG00000006350	UP_DDT	2.05882
ENSGALG000000380032	1.44914e-07	0.267561	0.459	0.306	0.0013148	8	ENSGALG00000038003	EDF1	1.5
ENSGALG000000167752	1.59087e-07	0.0907374	1	0.999	0.0014434	8	ENSGALG00000016775	RPL31	1.001
ENSGALG000000048315	1.73203e-07	0.0932148	1	0.999	0.00157147	8	ENSGALG00000004831	RPS4	1.001
ENSGALG00000007981	2.5939e-07	0.300022	0.179	0.082	0.00235345	8	ENSGALG00000007981	CLN6	2.18293
ENSGALG000000358364	2.59396e-07	0.201788	0.803	0.727	0.0023535	8	ENSGALG00000035836	LDHB	1.10454
ENSGALG00000007905	2.81128e-07	0.307389	0.353	0.215	0.00255068	8	ENSGALG00000007905	LAMB1	1.64186
ENSGALG000000394702	2.87127e-07	0.104534	1	0.998	0.0026051	8	ENSGALG00000039470	RPL10L	1.002
ENSGALG000000059222	3.5298e-07	0.0992812	0.94	0.938	0.00320259	8	ENSGALG00000005922	RPL5	1.00213
ENSGALG00000026231	3.70391e-07	0.29386	0.17	0.071	0.00336056	8	ENSGALG00000026231	ARID3A	2.39437
ENSGALG000000310382	3.75361e-07	0.0938273	0.995	0.996	0.00340565	8	ENSGALG00000031038	RPL28	0.998996
ENSGALG00000041037	3.89212e-07	0.293355	0.206	0.098	0.00353132	8	ENSGALG00000041037	YIPF3	2.10204
ENSGALG000000378631	4.44034e-07	0.197906	0.761	0.652	0.00402872	8	ENSGALG00000037863	SEC61G	1.16718
ENSGALG00000029508	4.60665e-07	0.242374	0.193	0.101	0.00417962	8	ENSGALG00000029508	SMIM19	1.91089
ENSGALG000000088064	4.79705e-07	0.0942525	1	0.999	0.00435237	8	ENSGALG00000008806	RPL12	1.001
ENSGALG000000048714	6.00957e-07	0.0827917	1	0.998	0.00545248	8	ENSGALG00000004871	RPS24	1.002
ENSGALG000000016343	6.6315e-07	0.0657583	1	1	0.00601676	8	ENSGALG00000001634	RPL23	1
ENSGALG000000112903	6.85375e-07	0.103673	1	0.999	0.00621841	8	ENSGALG00000011290	RPL15	1.001
ENSGALG000000025953	7.09214e-07	0.17597	0.693	0.589	0.0064347	8	ENSGALG00000002595	Glutathione peroxidase 5	1.17657
ENSGALG000000293433	7.10701e-07	0.155868	0.78	0.706	0.00644819	8	ENSGALG00000029343	EIF3K	1.10482
ENSGALG000000264905	7.65515e-07	0.0796586	1	0.999	0.00694552	8	ENSGALG00000026490	RPS16	1.001
ENSGALG00000014933	7.69634e-07	0.202548	0.193	0.105	0.00698289	8	ENSGALG00000014933	HEXB	1.8381
ENSGALG000000285174	8.00924e-07	0.236262	0.587	0.454	0.00726678	8	ENSGALG00000028517	EIF1	1.29295
ENSGALG000000045882	9.59346e-07	0.0766064	0.995	0.999	0.00870415	8	ENSGALG00000004588	RPS14	0.995996
ENSGALG00000001250	1.14167e-06	0.264232	0.225	0.129	0.0103584	8	ENSGALG00000001250	APLP2	1.74419
ENSGALG00000014787	1.20833e-06	0.2167	0.17	0.085	0.0109632	8	ENSGALG00000014787	SLC30A5	2
ENSGALG000000320523	1.38223e-06	0.0814168	1	0.999	0.012541	8	ENSGALG00000032052	RPS26	1.001
ENSGALG000000100775	1.4012e-06	0.0511168	1	0.998	0.0127131	8	ENSGALG00000010077	RPS3A	1.002
ENSGALG000000135371	1.43721e-06	0.244157	0.555	0.371	0.0130398	8	ENSGALG00000013537	TPM3	1.49596
ENSGALG000000304362	1.45925e-06	0.0980869	0.977	0.967	0.0132398	8	ENSGALG00000030436	MT-ND3	1.01034
ENSGALG000000096214	1.46036e-06	0.0748018	0.972	0.989	0.0132498	8	ENSGALG00000009621	ACTB	0.982811
ENSGALG000000039691	1.81875e-06	0.274378	0.193	0.096	0.0165016	8	ENSGALG00000003969	EMC1	2.01042
ENSGALG000000077113	1.87167e-06	0.079479	0.995	0.996	0.0169816	8	ENSGALG00000007711	RPL4	0.998996
ENSGALG00000033950	1.92265e-06	0.275425	0.156	0.077	0.0174442	8	ENSGALG00000033950	DERL1	2.02597
ENSGALG00000039191	2.25269e-06	0.210529	0.216	0.13	0.0204387	8	ENSGALG00000039191		1.66154
ENSGALG00000007848	2.30033e-06	0.210272	0.193	0.09	0.0208709	8	ENSGALG00000007848	PTS	2.14444
ENSGALG000000060963	3.39795e-06	0.0931533	0.995	0.991	0.0308296	8	ENSGALG00000006096	RPS13	1.00404
ENSGALG00000033677	3.69078e-06	0.307421	0.312	0.19	0.0334864	8	ENSGALG00000033677	AHCY	1.64211
ENSGALG000000166913	3.74597e-06	0.117576	0.734	0.694	0.0339872	8	ENSGALG00000016691	SLC25A6	1.05764
ENSGALG000000128213	4.05305e-06	0.314723	0.472	0.3	0.0367733	8	ENSGALG00000012821	TUBB2A	1.57333
ENSGALG00000015960	4.37453e-06	0.22158	0.202	0.108	0.0396901	8	ENSGALG00000015960	RPIA	1.87037
ENSGALG000000282651	4.43208e-06	0.287136	0.33	0.197	0.0402123	8	ENSGALG00000028265	SURF4	1.67513
ENSGALG000000026444	4.44557e-06	0.0850456	1	0.995	0.0403347	8	ENSGALG00000002644	RPL10A	1.00503
ENSGALG000000412001	4.71099e-06	0.196415	0.633	0.512	0.0427428	8	ENSGALG00000041200	ZNF706	1.23633
ENSGALG000000367903	4.8244e-06	0.0754524	1	0.998	0.0437718	8	ENSGALG00000036790	RPS27A	1.002
ENSGALG000000307122	5.04012e-06	0.23293	0.22	0.109	0.045729	8	ENSGALG00000030712	COL2A1	2.01835
